# Supplementary material for: Change in time spent visiting and experiences of green space following restrictions on movement during the COVID-19 pandemic: a nationally representative cross-sectional study of UK adults
Source: PubMed Central journal article supplement (PMC7942249; doi:10.1136/bmjopen-2020-044067), 2021-03-08
Supplement: bmjopen-2020-044067.draft_revisions.pdf [file bmjopen-2020-044067.draft_revisions.pdf]

# BMJ Open

BMJ Open is committed to open peer review. As part of this commitment we make the peer review history of every article we publish publicly available.

When an article is published we post the peer reviewers' comments and the authors' responses online. We also post the versions of the paper that were used during peer review. These are the versions that the peer review comments apply to.

The versions of the paper that follow are the versions that were submitted during the peer review process. They are not the versions of record or the final published versions. They should not be cited or distributed as the published version of this manuscript.

BMJ Open is an open access journal and the full, final, typeset and author-corrected version of record of the manuscript is available on our site with no access controls, subscription charges or pay-per-view fees (<http://bmjopen.bmj.com>).

If you have any questions on BMJ Open's open peer review process please email [info.bmjopen@bmj.com](mailto:info.bmjopen@bmj.com)

# BMJ Open

## Changes in the frequency and experiences of visits to green space following restrictions on movement during the COVID-19 pandemic: A nationally representative cross-sectional study of UK adults.

|                               |                                                                                                                                                                                                                                                                                                                                                                          |
|-------------------------------|--------------------------------------------------------------------------------------------------------------------------------------------------------------------------------------------------------------------------------------------------------------------------------------------------------------------------------------------------------------------------|
| Journal:                      | <i>BMJ Open</i>                                                                                                                                                                                                                                                                                                                                                          |
| Manuscript ID                 | bmjopen-2020-044067                                                                                                                                                                                                                                                                                                                                                      |
| Article Type:                 | Original research                                                                                                                                                                                                                                                                                                                                                        |
| Date Submitted by the Author: | 21-Aug-2020                                                                                                                                                                                                                                                                                                                                                              |
| Complete List of Authors:     | Burnett, Hannah; University of Glasgow, MRC/CSO Social and Public Health Sciences Unit<br>Olsen, Jonathan; University of Glasgow, MRC/CSO Social and Public Health Sciences Unit<br>Nicholls, Natalie; University of Glasgow, MRC/CSO Social and Public Health Sciences Unit<br>Mitchell, Richard; University of Glasgow, MRC/CSO Social and Public Health Sciences Unit |
| Keywords:                     | MENTAL HEALTH, COVID-19, PUBLIC HEALTH                                                                                                                                                                                                                                                                                                                                   |
|                               |                                                                                                                                                                                                                                                                                                                                                                          |

SCHOLARONE™  
Manuscripts

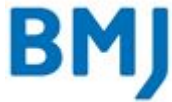

I, the Submitting Author has the right to grant and does grant on behalf of all authors of the Work (as defined in the below author licence), an exclusive licence and/or a non-exclusive licence for contributions from authors who are: i) UK Crown employees; ii) where BMJ has agreed a CC-BY licence shall apply, and/or iii) in accordance with the terms applicable for US Federal Government officers or employees acting as part of their official duties; on a worldwide, perpetual, irrevocable, royalty-free basis to BMJ Publishing Group Ltd ("BMJ") its licensees and where the relevant Journal is co-owned by BMJ to the co-owners of the Journal, to publish the Work in this journal and any other BMJ products and to exploit all rights, as set out in our [licence](#).

The Submitting Author accepts and understands that any supply made under these terms is made by BMJ to the Submitting Author unless you are acting as an employee on behalf of your employer or a postgraduate student of an affiliated institution which is paying any applicable article publishing charge ("APC") for Open Access articles. Where the Submitting Author wishes to make the Work available on an Open Access basis (and intends to pay the relevant APC), the terms of reuse of such Open Access shall be governed by a Creative Commons licence – details of these licences and which [Creative Commons](#) licence will apply to this Work are set out in our licence referred to above.

Other than as permitted in any relevant BMJ Author's Self Archiving Policies, I confirm this Work has not been accepted for publication elsewhere, is not being considered for publication elsewhere and does not duplicate material already published. I confirm all authors consent to publication of this Work and authorise the granting of this licence.

1  
2  
3 **Changes in the frequency and experiences of visits to green space following**  
4 **restrictions on movement during the COVID-19 pandemic: A nationally**  
5 **representative cross-sectional study of UK adults.**  
6  
7

8 **Hannah Burnett<sup>1</sup>, Jonathan R Olsen<sup>1</sup>, Natalie Nicholls<sup>1</sup>, Richard Mitchell<sup>1</sup>**  
9 **<sup>1</sup>MRC/CSO Social and Public Health Sciences Unit, University of Glasgow, Berkeley**  
10 **Square, 99 Berkeley Street, Glasgow, G3 7HR, United Kingdom.**  
11  
12

13 **Correspondence:**  
14 **Hannah Burnett**  
15 **MRC/CSO Social and Public Health Sciences Unit,**  
16 **University of Glasgow,**  
17 **Berkeley Square,**  
18 **99 Berkeley Street,**  
19 **Glasgow,**  
20 **G3 7HR.**  
21 **Email: h.burnett.1@research.gla.ac.uk**  
22  
23

24 **Key words: mental health; COVID-19; public health.**  
25  
26

27 **Word Count: 3,054**  
28 **Tables : 3**  
29 **Figures : 1**  
30 **Supplementary tables : 3**  
31  
32  
33  
34  
35  
36  
37  
38  
39  
40  
41  
42  
43  
44  
45  
46  
47  
48  
49  
50  
51  
52  
53  
54  
55  
56  
57  
58  
59  
60

## ABSTRACT

**Objectives** Green space has previously been found to positively influence health and well-being, however inequalities in green space visitation are prevalent. Restrictions on movement enforced due to the COVID-19 pandemic could have exacerbated the existing inequalities regarding who visits green space. Therefore, this study aimed to explore how restrictions on movement have changed the frequency and experiences of visits to green space in the United Kingdom (UK) and how these differed by individual-level demographic and socio-economic characteristics.

**Design and outcome measures** A nationally representative cross-sectional survey administered through YouGov between 30<sup>th</sup> April – 1<sup>st</sup> May 2020. Data were collected on the frequency of visits and experiences within green space, including missing social interaction, increased physical activity, and feeling greater mental health benefits in green space. Demographic information was collected on sex, age, ethnicity, social grade and dog ownership. Associations between specific outcome variables and predictors were assessed using logistic regression.

**Setting** United Kingdom, with population weights applied.

**Participants** 2,252 adults aged 18 years and over.

**Results** Overall, 63% of respondents reported a decrease in green space visits following restrictions on movement. Lower social grade respondents were less likely to visit green space before *and* after restrictions were enforced (OR: 0.35 (95% CI: 0.24-0.51); OR: 0.68 (95% CI: 0.56-0.83)). Older (65+) (OR: 1.30 (95% CI: 1.04-1.64)) and female (OR: 1.26 (95% CI: 1.04-1.54)) respondents were more likely than middle age (25 to 64 years) and male respondents to report decreased visits and to agree that green space benefitted their mental health more following restrictions on movement.

**Conclusions** Inequalities in green space use were sustained, and possibly exacerbated, during restrictions on movement. Further investigation is required to determine how these patterns change through the different stages of the COVID-19 pandemic in the UK.

**(Word Count: 289)**

### Strengths and Limitations of this study

- Our data are currently the only existing data covering change in the frequency and experiences of green space for the UK population following the restrictions on movement enforced due to the COVID-19 pandemic.
- The sample is nationally representative of UK adults.
- The data collected for this study were from a cross-sectional survey, therefore it is not possible to demonstrate causality between change in green space use and experiences and the demographic data.
- Certain variable response categories were recategorised for analysis, which meant that some distinctiveness across groups were lost, particularly for the ethnicity and age variables.

## INTRODUCTION

Evidence suggests that exposure to green space has a positive influence on health and well-being.[1,2] Green space has been found to increase levels of social interaction and physical activity, and decrease levels of all-cause mortality, loneliness and stress.[3–5] Additionally, there is evidence that contact with green space may disproportionately benefit disadvantaged populations, reducing health inequalities and therefore weakening the effects of poverty – known as the ‘equigenic’ effect.[6,7]

The health impacts of contact with green spaces are quite well studied by both observational and experimental designs. There is rather less literature on the levels, motivations and barriers of visiting green spaces in the first place. Recent surveys by Natural England and Scottish Natural Heritage have found that 74% of the English population and 70% of the Scottish population visit green space ‘frequently’ (once a month or more often). In both countries, the top three reasons stated for frequent green space use were health and exercise, walking the dog, and to relax/unwind.[8,9] Further research exploring the motivations and reasons for visiting green space found that visitation frequency is affected by an individual’s feelings of nature connectedness, as well as their childhood exposure to nature.[10–12]. It is important to note that substantial inequalities in green space use have also been reported, with existing studies stating that females, older people and those from less advantaged socioeconomic positions (SEP) are more likely to be infrequent users than their male, younger and higher SEP counterparts.[9,13–15]

In 2020, the United Kingdom (UK) experienced major disruption to everyday life due to the novel coronavirus disease 2019 (COVID-19) pandemic. COVID-19 is an infectious disease first identified in the city of Wuhan, China in December 2019.[16] As a result of the COVID-19 outbreak, the UK announced a series of restrictions on movement from 23<sup>rd</sup> March 2020. These included rules around social distancing, meaning that people could only leave their households to make ‘essential trips’ for food, medication and exercise.[17] The aim of this research was to explore changes in the frequency and experience of visits to green space among the UK population following restrictions on movement. The sociodemographic characteristics focused on were those identified by the literature as being most consistent markers of inequality in use. The research questions were:

- 1) How did frequency of green space use change following restrictions on movement, compared with before, and for whom?
- 2) How did experiences of visits to green space change following the restrictions, and did any change vary by sex, social grade, age, ethnicity and dog ownership?  
Specifically,
  - a) Did respondents feel that green space benefitted their mental health more since restrictions than before?
  - b) Did respondents miss social interaction in green space more following restrictions on movement?
  - c) Had physical activity increased following restrictions on movement?

## METHODS

### Survey design and sample

An online cross-sectional survey was administered by YouGov between 30<sup>th</sup> April and 1<sup>st</sup> May 2020.[18] Questions were answered by a sample of 2,252 adults from the UK (aged 18 and over). The sample was drawn from a panel of over 800,000 individuals who specifically opted in to participate in online research activities. Sample members were selected at random from the panel and sent an email providing a survey link. Table 1 shows the themes and specific survey instruments analysed in this paper. Demographic information about participants was also collected (including sex, age and social grade, which was classified by occupation).[19,20] Although the sample was reasonably large, small numbers in variable response categories necessitated some category mergers (Table 1 and Supplementary Table 1).

The survey covered adults from across the UK, with respondents from England (N=1,875), Scotland (N=209), Wales (N=107), Northern Ireland (N=61) and weightings were applied to render the sample representative of UK adults (detailed below). When the survey was distributed, the same restrictions on movement were implemented across the UK. Since then, the individual parliaments/assemblies representing these countries have imposed different COVID-19 policies.

**Table 1:** Survey themes and specific items analysed, including variables recategorised.

| Themes                                                                        | Question/statement                                                                                                                                                                                                                                                                         | Potential responses                                                                                                                     | Recategorised                                                                                                                                                                                                                                       |
|-------------------------------------------------------------------------------|--------------------------------------------------------------------------------------------------------------------------------------------------------------------------------------------------------------------------------------------------------------------------------------------|-----------------------------------------------------------------------------------------------------------------------------------------|-----------------------------------------------------------------------------------------------------------------------------------------------------------------------------------------------------------------------------------------------------|
| Visit frequency and change                                                    | <i>"Did you EVER visit a green space in the year before the movement restrictions were enforced in the UK?"</i>                                                                                                                                                                            | Yes, I did<br>No, I didn't<br>Don't know/<br>can't recall                                                                               | -                                                                                                                                                                                                                                                   |
|                                                                               | <i>"Please think about your behaviour since the UK enforced a 'lock down' to restrict movement, as a result of the current Coronavirus (COVID-19) outbreak (i.e. since 23rd March 2020). Have you visited a green space since the movement restrictions have been enforced in the UK?"</i> | Yes, I have<br>No, I haven't<br>Don't know/<br>can't recall                                                                             | -                                                                                                                                                                                                                                                   |
|                                                                               | <i>"How much, if at all, has the amount of time that you have spent visiting green spaces changed since the 'lock down' movement restrictions began (i.e. 23rd March 2020) compared to before?"</i>                                                                                        | Increased a lot<br>Increased a little<br>No difference<br>Decreased a little<br>Decreased a lot<br>Don't know                           | 'Increased' (increased a lot and increased a little vs. no difference, decreased a little and decreased a lot)<br><br>'Decreased' (decreased a lot and decreased a little vs. no difference, increased a little and increased a lot)                |
| Experience change (If respondent had visited a green space since the movement | <i>"I feel that being in green spaces benefits my mental health <u>more now</u>, than before the movement restrictions were in place"</i>                                                                                                                                                  | Strongly agree<br>Slightly agree<br>Neither agree nor disagree<br>Slightly disagree<br>Strongly disagree<br>Don't know/<br>can't recall | 'Agree' (strongly agree and slightly agree vs. neither agree nor disagree, slightly disagree, and strongly disagree)<br><br>'Disagree' (slightly disagree and strongly disagree vs. neither agree nor disagree, slightly agree, and strongly agree) |

|                             |                                                                                                                           |                                                                                                                                         |                                                                                                                                                                                                                                                     |
|-----------------------------|---------------------------------------------------------------------------------------------------------------------------|-----------------------------------------------------------------------------------------------------------------------------------------|-----------------------------------------------------------------------------------------------------------------------------------------------------------------------------------------------------------------------------------------------------|
| restrictions were enforced) | <i>"I have missed seeing and/ or talking with people in green spaces since the movement restrictions were introduced"</i> | Strongly agree<br>Slightly agree<br>Neither agree nor disagree<br>Slightly disagree<br>Strongly disagree<br>Don't know/<br>can't recall | 'Agree' (strongly agree and slightly agree vs. neither agree nor disagree, slightly disagree, and strongly disagree)<br><br>'Disagree' (slightly disagree and strongly disagree vs. neither agree nor disagree, slightly agree, and strongly agree) |
|                             | <i>"I do more physical activity in green spaces now, than I did before the movement restrictions were introduced"</i>     | Strongly agree<br>Slightly agree<br>Neither agree nor disagree<br>Slightly disagree<br>Strongly disagree<br>Don't know/<br>can't recall | 'Agree' (strongly agree and slightly agree vs. neither agree nor disagree, slightly disagree, and strongly disagree)<br><br>'Disagree' (slightly disagree and strongly disagree vs. neither agree nor disagree, slightly agree, and strongly agree) |

## Demographic variables

Individual level demographic and socio-economic characteristics were captured from the survey, as follows: sex (male, female); age group (18-24 years, 25-64 years, 65+ years); ethnicity (White, Black, Asian and minority ethnic (BAME)); dog ownership (Yes, No); and social grade (ABC1, C2DE), derived by YouGov from combined occupational social grade categories. ABC1 was the higher social grade, and included non-manual workers, for example, senior managers and owners of small establishments. C2DE was the lower social grade, and included all manual workers, for example, shop assistants and labourers.[21] Hereafter, social grade will be described as higher and lower social grade.

## Patient and Public Involvement

There was no direct patient or public involvement in this study.

## Analyses

### Descriptive statistics

The count and proportion of respondents who had: visited green space before and after restrictions on movement were enforced; increased or decreased visitation; and agreed or disagreed with the three change in experience statements (Table 1) are presented. These were also explored by sex, age, ethnicity, dog ownership and social grade.

### Statistical analysis

Multiple binary logistic regression analyses were conducted to assess the association between the individual predictor variables and each of the following outcomes:

1. having visited green space in the year before restrictions on movement were enforced;
2. having visited green space since restrictions on movement were enforced;



3. having increased green space visitation following restrictions on movement;
4. having decreased green space visitation following restrictions on movement;
5. agreeing that green space benefits their mental health more now (since restrictions on movement were enforced compared to before);
6. agreeing that they miss seeing/talking to people in green space now (since restrictions on movement were enforced compared to before); and
7. agreeing that they do more physical activity in green space now (since restrictions on movement were enforced compared to before).

Associations were expressed as odds ratios (OR) with 95% confidence intervals (CIs). Univariate models for each predictor were conducted first, followed by a fully adjusted model containing all predictors for each outcome. Weightings were calculated by YouGov and applied during analyses to render the sample representative of UK adults.[20] All analyses were conducted in R v3.5.1,[22] a full R script is available on GitHub.[23]

## Interactions

Given existing literature,[9,13,24,25] we expected some interactions between predictor variables, which included sex, age, social grade, ethnicity and dog ownership, in their relationships with change in frequency and experiences within green spaces following restrictions on movement. We therefore explored interactions, adding interaction terms to the models, assessing their significance via Wald tests, and then producing predicted probabilities to aid interpretation of the significant interactions.

## RESULTS

### Descriptive statistics

93% of all respondents had visited green space in the year before restrictions on movement were enforced (Supplementary Table 2). In contrast, 49% of respondents reported visiting green space following restrictions on movement. 63% of respondents reported that the amount of time they spent in green space had decreased since restrictions on movement compared to before, with 15% reporting an increase, and 22% reporting no difference in visitation frequency.

A greater proportion of respondents agreed (65%) than disagreed (35%) that green space benefited their mental health more following restrictions on movement compared to before (Supplementary Table 3). More respondents agreed (54%) that they missed social interaction in green space more since restrictions on movement, than disagreed (46%). 71% of respondents disagreed that they had increased physical activity in green space since restrictions on movement, compared to 29% who agreed.

### Visit frequency and change

#### Visiting green space before restrictions on movement

In the adjusted logistic regression model for visiting green space in the year before restrictions on movement were enforced (Table 2), only two variables had significant associations ( $p < 0.05$ ). Lower social grade respondents (OR: 0.35 (95%CI: 0.24-0.51)) and

1  
2  
3 BAME (OR: 0.43 (95%CI: 0.23-0.80)) respondents both had lower odds of visiting green  
4 space before restrictions on movement were enforced, compared to higher social grade and  
5 white respondents.  
6  
7

## 8 Visiting green space following restrictions on movement 9

10 Respondents in the lower social grade group were less likely to have visited green space than  
11 respondents in the higher social grade group (OR: 0.68 (95%CI: 0.56-0.83)) (Table 2).  
12 Respondents who owned a dog/s were more likely than respondents who did not to have  
13 visited green space after restrictions on movement were enforced (OR: 1.44 (95%CI: 1.16-  
14 1.79)).  
15  
16  
17  
18

## 19 Change in frequency of green space visitation 20

21 Lower social grade respondents were less likely than higher social grade respondents to  
22 report increased visits following restrictions on movement (OR: 0.52 (95%CI: 0.38-0.70))  
23 (Table 2). Older respondents (aged 65+) were less likely to report increased green space  
24 visitations than respondents aged between 25-64 years (OR: 0.59 (95%CI: 0.41-0.84)). Sex  
25 and older age were significantly associated with *decreased* visits. Females were more likely  
26 to report decreased green space visits compared to males (OR: 1.26 (95%CI:1.04-1.54)), and  
27 older respondents were more likely to report a decrease in green space visits than respondents  
28 aged 25-64 years (OR: 1.30 (95%CI: 1.04-1.64)) (Table 2).  
29  
30  
31

## 32 Interaction effects 33

34 Three interactions were significant ( $p < 0.05$ ); one between social grade and ethnicity in their  
35 association with visiting green space before restrictions on movement, and two between age  
36 and ethnicity, in their association with visiting green spaces since restrictions on movement  
37 and with *increased* visits since restrictions on movement.  
38  
39

40 Higher social grade white respondents had the highest probability of visiting green space  
41 before lockdown, but lower social grade BAME respondents were more likely to have visited  
42 green space before lockdown than the higher social grade BAME respondents (Figure 1).  
43 Young BAME respondents had a higher probability of visiting green space and reporting  
44 increased visits since lockdown compared to white and older BAME respondents. However,  
45 the number of BAME respondents, especially young and older BAME respondents, in this  
46 sample was small and these results should be interpreted with caution.  
47  
48  
49  
50  
51  
52  
53  
54  
55  
56  
57  
58  
59  
60

**Table 2: Adjusted binary logistic regression models predicting change in frequency of green space visitation. OR = odds ratio; CI = confidence intervals;  $p < 0.05$ .**

|                                | Visited green space in the year before restrictions ('yes') |         | Visited green space after restrictions ('yes') |         | Green space visitation change since lockdown ('increased') |         | Green space visitation change since lockdown ('decreased') |         |
|--------------------------------|-------------------------------------------------------------|---------|------------------------------------------------|---------|------------------------------------------------------------|---------|------------------------------------------------------------|---------|
|                                | Adjusted                                                    |         | Adjusted                                       |         | Adjusted                                                   |         | Adjusted                                                   |         |
|                                | OR (95% CI)                                                 | p-value | OR (95% CI)                                    | p-value | OR (95% CI)                                                | p-value | OR (95% CI)                                                | p-value |
| <b>Sex</b>                     |                                                             |         |                                                |         |                                                            |         |                                                            |         |
| <b>Male (ref)</b>              | -                                                           | -       | -                                              | -       | -                                                          | -       | -                                                          | -       |
| <b>Female</b>                  | 1.35 (0.94-1.95)                                            | 0.109   | 0.92 (0.76-1.11)                               | 0.361   | 0.96 (0.72-1.27)                                           | 0.755   | 1.26 (1.04-1.54)                                           | 0.020   |
| <b>Social grade</b>            |                                                             |         |                                                |         |                                                            |         |                                                            |         |
| <b>ABC1 (ref)</b>              | -                                                           | -       | -                                              | -       | -                                                          | -       | -                                                          | -       |
| <b>C2DE</b>                    | 0.35 (0.24-0.51)                                            | <0.001  | 0.68 (0.56-0.83)                               | <0.001  | 0.52 (0.38-0.70)                                           | <0.001  | 0.96 (0.79-1.17)                                           | 0.704   |
| <b>Age</b>                     |                                                             |         |                                                |         |                                                            |         |                                                            |         |
| <b>18-24</b>                   | 2.92 (1.00-8.57)                                            | 0.051   | 0.93 (0.63-1.36)                               | 0.692   | 1.60 (0.97-2.63)                                           | 0.064   | 0.77 (0.52-1.15)                                           | 0.201   |
| <b>25-64 (ref)</b>             | -                                                           | -       | -                                              | -       | -                                                          | -       | -                                                          | -       |
| <b>65+</b>                     | 1.22 (0.80-1.85)                                            | 0.353   | 0.81 (0.65-1.01)                               | 0.058   | 0.59 (0.41-0.84)                                           | 0.004   | 1.30 (1.04-1.64)                                           | 0.023   |
| <b>Ethnicity</b>               |                                                             |         |                                                |         |                                                            |         |                                                            |         |
| <b>White (ref)</b>             | -                                                           | -       | -                                              | -       | -                                                          | -       | -                                                          | -       |
| <b>BAME</b>                    | 0.43 (0.23-0.80)                                            | 0.007   | 0.91 (0.59-1.39)                               | 0.651   | 1.15 (0.63-2.08)                                           | 0.650   | 0.67 (0.43-1.03)                                           | 0.068   |
| <b>Dog ownership</b>           |                                                             |         |                                                |         |                                                            |         |                                                            |         |
| <b>Don't own a dog/s (ref)</b> | -                                                           | -       | -                                              | -       | -                                                          | -       | -                                                          | -       |
| <b>Own a dog/s</b>             | 1.29 (0.83-2.00)                                            | 0.260   | 1.44 (1.16-1.79)                               | 0.001   | 0.74 (0.53-1.03)                                           | 0.070   | 0.83 (0.67-1.04)                                           | 0.109   |

## Change in visit experience

### Mental health benefits

Agreeing that green space benefits mental health more since restrictions on movement compared to before was associated with sex, social grade, age (only 65+) and dog ownership (Table 3). Females were more likely to agree than males that being in green space benefitted their mental health more following restrictions on movement than before (OR: 1.60 (95% CI: 1.19-2.15)). Whilst lower social grade (OR: 0.69 (95% CI: 0.51-0.93)), older respondents (OR: 0.58 (95% CI: 0.42-0.82)), and dog owners (OR: 0.72 (95% CI: 0.52-0.98)) were less likely to agree.

### Missed social interaction

Female respondents were more likely to agree that they missed seeing and talking with other people in green space since restrictions on movement compared to before than male respondents (OR: 1.72 (95% CI: 1.30-2.28)) (Table 3).

### Increased physical activity

Younger respondents were more likely (OR: 1.93 (95% CI: 1.06-3.54)) than the middle age group respondents to agree that they had done more physical activity since restrictions on movement were enforced whilst older respondents were less likely to agree (OR: 0.53 (95% CI: 0.35-0.79)) (Table 3). Respondents who owned a dog/s were less likely than respondents without a dog/s to agree (OR: 0.45 (95% CI: 0.31-0.65)).

## DISCUSSION

There was a general polarisation of use following restrictions on movement; for example, older respondents reported decreased visits to green space, whilst younger respondents reported increased physical activity levels in green spaces following restrictions on movement. Our findings suggest that inequalities in use of green space between demographic groups were sustained following restrictions on movement, with lower social grade individuals less likely than higher social grade individuals to have visited green space before and since restrictions on movement. These inequalities were possibly exacerbated in the month after restrictions on movement were enforced, as females and older respondents were more likely to report a decrease in visits following restrictions on movement.

The proportion of respondents who visited green space before and following restrictions on movement decreased, from 93% to 49%. This was consistent with Natural England's findings from April 2020 where 49% of English adults reported green space visits in the previous two weeks.[26] Natural England conducted an online panel survey in April 2020 (N=2,083), the survey covered only the English population, collecting information on the frequency of time in green and natural spaces in the 12 months, and then 2 weeks, prior to the survey.[27] The survey did not directly ask respondents about whether they felt their experiences within green space had changed following restrictions on movement.

**Table 3: Adjusted binary logistic regression models predicting change in experience of green space since restrictions. OR = odds ratio; CI = confidence intervals;  $p < 0.05$ .**

|                                | Using green spaces benefits my mental health more now ('agree') |         | Miss social interaction in green spaces now ('agree') |         | Do more physical activity in green spaces now ('agree') |         |
|--------------------------------|-----------------------------------------------------------------|---------|-------------------------------------------------------|---------|---------------------------------------------------------|---------|
|                                | Adjusted OR (95% CI)                                            | p-value | Adjusted OR (95% CI)                                  | p-value | Adjusted OR (95% CI)                                    | p-value |
| <b>Sex</b>                     |                                                                 |         |                                                       |         |                                                         |         |
| <b>Male (ref)</b>              | -                                                               | -       | -                                                     | -       | -                                                       | -       |
| <b>Female</b>                  | 1.60 (1.19-2.15)                                                | 0.002   | 1.72 (1.30-2.28)                                      | <0.001  | 1.22 (0.88-1.68)                                        | 0.232   |
| <b>Social grade</b>            |                                                                 |         |                                                       |         |                                                         |         |
| <b>ABC1 (ref)</b>              | -                                                               | -       | -                                                     | -       | -                                                       | -       |
| <b>C2DE</b>                    | 0.69 (0.51-0.93)                                                | 0.014   | 0.79 (0.59-1.06)                                      | 0.118   | 0.81 (0.58-1.14)                                        | 0.227   |
| <b>Age</b>                     |                                                                 |         |                                                       |         |                                                         |         |
| <b>18-24</b>                   | 0.59 (0.32-1.11)                                                | 0.102   | 1.40 (0.77-2.57)                                      | 0.270   | 1.93 (1.06-3.54)                                        | 0.033   |
| <b>25-64 (ref)</b>             | -                                                               | -       | -                                                     | -       | -                                                       | -       |
| <b>65+</b>                     | 0.58 (0.42-0.82)                                                | 0.002   | 1.08 (0.78-1.50)                                      | 0.643   | 0.53 (0.35-0.79)                                        | 0.002   |
| <b>Ethnicity</b>               |                                                                 |         |                                                       |         |                                                         |         |
| <b>White (ref)</b>             | -                                                               | -       | -                                                     | -       | -                                                       | -       |
| <b>BAME</b>                    | 1.72 (0.80-3.69)                                                | 0.162   | 1.03 (0.53-2.01)                                      | 0.923   | 1.47 (0.73-2.96)                                        | 0.278   |
| <b>Dog ownership</b>           |                                                                 |         |                                                       |         |                                                         |         |
| <b>Don't own a dog/s (ref)</b> | -                                                               | -       | -                                                     | -       | -                                                       | -       |
| <b>Own a dog/s</b>             | 0.72 (0.52-0.98)                                                | 0.038   | 1.25 (0.92-1.70)                                      | 0.154   | 0.45 (0.30-0.65)                                        | <0.001  |

1  
2  
3 Females and older individuals were more likely to have reported decreased visits to green  
4 space following restrictions on movement. These findings corroborate with existing data  
5 collected before restrictions on movement.[9,13,14] Boyd *et al.* analysed the Natural England  
6 ‘Monitor of Engagement with the Natural Environment’ survey (N=63,890) with a focus on  
7 infrequent use. They found that females and older adults in England were more likely to be  
8 infrequent visitors.[9] Cohen *et al.* explored physical activity levels in Los Angeles’ parks  
9 (N=1,318). They reported that age and sex were predictors of park use, with <5% of park  
10 users over 60 years old, and males using parks more often than females (62% vs. 38%).[13]  
11  
12

13  
14 Our findings suggested that existing patterns of inequality in use by females were sustained  
15 and potentially exacerbated due to fears arising from the COVID-19 pandemic. For example,  
16 an Ipsos MORI survey was conducted in April 2020, collecting data on gender differences in  
17 British attitudes towards COVID-19. They found that women were more likely to report  
18 following government rules to avoid leaving their home (78%) than men (68%) and felt more  
19 uncomfortable about returning to “normal” (N=1,000).[28,29]  
20  
21

22 Previous studies have found that females feel more vulnerable than males in green spaces,  
23 especially without company.[14,15,24,30–32] There are few quantitative studies focusing on  
24 sex and the importance of social interaction as a motivation behind green space use. We  
25 found that females were more likely to agree that they missed seeing/talking with others in  
26 green space than males. This could be explained by the nature of the restrictions on  
27 movement at this time, particularly the inability to socially interact with individuals outside  
28 your household in green space.  
29  
30

31 Given older age is probably the most important risk factor for an adverse outcome from  
32 COVID-19,[33,34] it was not surprising that older individuals were more likely to report a  
33 decrease in green space visits and to disagree that they were doing more physical activity  
34 following restrictions on movement. These findings corroborate with the majority of research  
35 exploring older age and green space use before the restrictions on movement.[9,13,35] The  
36 significant decrease in green space visits following restrictions on movement for older  
37 respondents could be explained by the government advice for over 70s and those with an  
38 underlying health condition to shield, minimise interaction and stay at home, for around 12  
39 weeks from 21<sup>st</sup> March 2020.[36]  
40  
41

42 Lower social grade respondents reported little or no change in visitation to green space, with  
43 visit frequency remaining low both before and after restrictions on movement. This is  
44 supported by previous studies exploring the association between socio-economic position  
45 (SEP) and green space use.[9,15,35] One possible explanation is a lack of interest in visiting  
46 green space reported by lower SEP individuals.[9] Additionally, the social grade variable was  
47 categorised by occupation, and it was likely that individuals categorised as lower social grade  
48 were working in manual or service occupations.[21] They may have continued at their usual  
49 workplace/working hours during the COVID-19 pandemic. Findings from the Office for  
50 National Statistics support this explanation, with 30.5% of employees in the bottom three  
51 income deciles (monthly earnings of up to £1,450) considered as key workers in March/April  
52 2020, compared to 26.4% in the top three income deciles (monthly earnings of up to  
53 £3,250).[37]  
54  
55  
56

57 Younger BAME respondents had a higher probability of visiting green space following  
58 restrictions on movement and reporting increased visits since restrictions on movement,  
59 compared to white and older BAME respondents. A survey on park use and ethnic integration  
60

1  
2  
3 in Reading, UK (N=294) reported similar findings, with Black and Asian youths accounting  
4 for a higher proportion of parks users than white youths.[38] Further exploration is required  
5 to enable interpretation of these interaction results because of our small BAME sample.  
6  
7

## 8 **Strengths and limitations**

9

10 Our study has several strengths; to our knowledge, currently this is the only data covering  
11 UK population change in use and experiences within green space at the start of the  
12 restrictions on movement from 23<sup>rd</sup> March 2020. This means that the data could provide  
13 timely information to local and national governments across the UK. The rapid collection of  
14 data, just over a month after the restrictions on movement were introduced, reduces risk of  
15 recall bias. The sample is nationally representative of UK adults, with weightings calculated  
16 by YouGov and applied to all analyses, reducing risk of selection bias.  
17  
18

19 A further strength of our study is providing quantitative data on the importance of social  
20 interaction as a driver for using green space, which is under-reported in the literature. We  
21 analysed social grade at an individual level, which provides greater detail and accuracy of the  
22 respondent's SEP than at neighbourhood level.  
23  
24

25 There are some caveats. The survey design was cross-sectional, and we are unable to  
26 demonstrate causality between change in green space use and experiences and the  
27 demographic data. Additionally, the data on use and experiences are self-reported and  
28 therefore subjective. Certain variable response categories had to be recategorised in order to  
29 analyse them. This is particularly evident in the ethnicity and age variables, where some  
30 distinctiveness across groups was lost.  
31  
32

33 We encourage future research to further investigate the interactions between ethnicity, age  
34 and social grade in relation to green space use to enable more substantial interpretation of the  
35 results and to explore whether the patterns are consistent over time and in different contexts.  
36 Moreover, further research is required to explore the reasons *why* many patterns and changes  
37 in use of green space since restrictions on movement have emerged.  
38  
39

## 40 **CONCLUSION**

41

42 During the COVID-19 pandemic, our study provides timely and novel evidence to suggest  
43 that green space use and experiences were affected during the first month of restrictions on  
44 movement in the UK. Our findings suggested that inequalities in use were sustained, with  
45 lower social grade individuals less likely to visit green space than higher social grade  
46 individuals before and following restrictions on movement were enforced. It is possible that  
47 these inequalities were exacerbated, as females and older individuals were the groups most  
48 likely to report decreased visits following restrictions on movement. Further investigation is  
49 required to support these findings and how they may change through the stages of the  
50 COVID-19 pandemic and the relaxing, and potential re-introduction, of restrictions on  
51 movement.  
52  
53  
54

## 55 **COMPETING INTERESTS**

56 None declared.  
57

## 58 **DATA SHARING STATEMENT**

59  
60

We have made our research dataset publicly available (Datacite DOI: 10.5525/gla.researchdata.1038 - embargoed until 31/10/2023).

## CONTRIBUTORS

HB, JRO and RM designed the study and survey; HB conducted data analysis which was reviewed by NN; HB wrote the first draft of the paper; all authors contributed to interpreting the results and revising the draft. The corresponding author attests that all listed authors meet authorship criteria and that no others meeting the criteria have been omitted.

## FUNDING STATEMENT

The authors (HB, JRO, NN & RM) are part of the Places and Health Programme at the MRC/CSO Social and Public Health Sciences Unit (SPHSU), University of Glasgow, supported by the Medical Research Council (MC\_UU\_12017/10) and the Chief Scientist Office (SPHSU10).

## References:

- 1 Barton J, Pretty J. What is the Best Dose of Nature and Green Exercise for Improving Mental Health? A Multi-Study Analysis. *Environ Sci Technol* 2010;**44**:3947–55. doi:10.1021/es903183r
- 2 Douglas O, Lennon M, Scott M. Green space benefits for health and well-being: A life-course approach for urban planning, design and management. *CITIES* 2017;**66**:53–62. doi:10.1016/j.cities.2017.03.011
- 3 Twohig-Bennett C, Jones A. The health benefits of the great outdoors: A systematic review and meta-analysis of greenspace exposure and health outcomes. *Environ Res* 2018;**166**:628–37. doi:10.1016/j.envres.2018.06.030
- 4 Maas J, Van Dillen SME, Verheij RA, *et al.* Social contacts as a possible mechanism behind the relation between green space and health. *Health Place* 2009;**15**:586–95. doi:10.1016/j.healthplace.2008.09.006
- 5 Wells N, Evans G. NEARBY NATURE A Buffer of Life Stress Among Rural Children. *Environ Behav* 2003;**35**:311–30. doi:10.1177/0013916503251445
- 6 Frumkin H, Bratman GN, Breslow SJ, *et al.* Nature Contact and Human Health: A Research Agenda. *Environ Health Perspect* 2017;**125**. doi:10.1289/EHP1663
- 7 Mitchell RJ, Richardson EA, Shortt NK, *et al.* Neighborhood Environments and Socioeconomic Inequalities in Mental Well-Being. *Am J Prev Med* 2015;**49**:80–4. doi:10.1016/j.amepre.2015.01.017
- 8 Wilson V, Seddon B. Scotland's People and Nature Survey 2017/18 – outdoor recreation and health modules. ( Scottish Natural Heritage Research Report No. 1062). Inverness: 2018.
- 9 Boyd F, White MP, Bell SL, *et al.* Who doesn't visit natural environments for recreation and why: A population representative analysis of spatial, individual and temporal factors among adults in England. *Landsc Urban Plan* 2018;**175**:102–13. doi:10.1016/j.landurbplan.2018.03.016
- 10 Bell SL, Phoenix C, Lovell R, *et al.* Green space, health and wellbeing: making space for individual agency. *Health Place* 2014;**30**:287–92. doi:10.1016/j.healthplace.2014.10.005
- 11 Lin BB, Fuller RA, Bush R, *et al.* Opportunity or Orientation ? Who Uses Urban Parks and Why. 2014;**9**:1–7. doi:10.1371/journal.pone.0087422
- 12 Ward Thompson C, Aspinall P, Montarzino A. The Childhood Factor Adult Visits to Green Places and the Significance of Childhood Experience. *Environ Behav*



- 2008;**40**:111–43. doi:10.1177/0013916507300119
- 13 Cohen DA, McKenzie TL, Sehgal A, *et al.* Contribution of Public Parks to Physical Activity. *Am J Public Health* 2007;**97**:509–14. doi:10.2105/AJPH.2005.072447
- 14 Lee ACK, Maheswaran R. The health benefits of urban green spaces: A review of the evidence. *J Public Health (Bangkok)* 2011;**33**:212–22. doi:10.1093/pubmed/fdq068
- 15 Morris J, O'Brien E, Ambrose-Oji B, *et al.* Access for all? Barriers to accessing woodlands and forests in Britain. *Local Environ Int J Justice Sustain* 2011;**16**:375–96. doi:10.1080/13549839.2011.576662
- 16 Wynants L, Van Calster B, Bonten MMJ, *et al.* Prediction models for diagnosis and prognosis of covid-19 infection: systematic review and critical appraisal . *BMJ* 2020;**369**. doi:10.1136/bmj.m1328
- 17 Johnson B. Prime Minister's statement on coronavirus (COVID-19): 23 March 2020. GOV.UK. 2020.<https://www.gov.uk/government/speeches/pm-address-to-the-nation-on-coronavirus-23-march-2020> (accessed 7 Jul 2020).
- 18 YouGov. About YouGov Company. <https://yougov.co.uk/about/> (accessed 8 Jun 2020).
- 19 YouGov and ESOMAR (World Association for Social Opinion and Market Research). ESOMAR 28: 28 Questions to help Online Research Buyers. The Netherlands: 2012. [http://cdn.yougov.com/cumulus\\_uploads/document/t3r5k565j5/ESOMAR\\_28.pdf](http://cdn.yougov.com/cumulus_uploads/document/t3r5k565j5/ESOMAR_28.pdf) (accessed 8 Jun 2020).
- 20 YouGov. Panel Methodology. <https://yougov.co.uk/about/panel-methodology/> (accessed 8 Jun 2020).
- 21 The Market Research Society (MRS). Definitions employed in Social Grading. MRS. [https://www.mrs.org.uk/pdf/Definitions used in Social Grading based on OG7.pdf](https://www.mrs.org.uk/pdf/Definitions%20used%20in%20Social%20Grading%20based%20on%20OG7.pdf) (accessed 2 Jul 2020).
- 22 R Core Team. R: A Language and Environment for Statistical Computing. 2018.<https://www.r-project.org/>
- 23 Burnett H. Change in green space use and experiences following UK restrictions on movement. GitHub. 2020.[https://github.com/hannahburnett/greenspace-covid\\_code](https://github.com/hannahburnett/greenspace-covid_code) (accessed 21 Jul 2020).
- 24 Richardson EA, Mitchell R. Gender differences in relationships between urban green space and health in the United Kingdom. *Soc Sci Med* 2010;**71**:568–75. doi:10.1016/J.SOCSCIMED.2010.04.015
- 25 Astell-Burt T, Mitchell R, Hartig T, *et al.* The association between green space and mental health varies across the lifecourse. A longitudinal study. *J Epidemiol Community Heal* 2014;**68**:578–83. doi:10.1136/jech-2013-203767
- 26 Natural England. The People and Nature Survey for England: Monthly interim indicators for April 2020 (Experimental Statistics) . Nat. Engl. 2020.<https://www.gov.uk/government/publications/the-people-and-nature-survey-for-england-monthly-interim-indicators-for-april-2020-experimental-statistics/the-people-and-nature-survey-for-england-monthly-interim-indicators-for-april-2020-experimental-statistics> (accessed 25 Jun 2020).
- 27 Natural England. The People and Nature Survey For England. 2020. <http://publications.naturalengland.org.uk/publication/6382837173583872>
- 28 Ipsos MORI. Gender differences in attitudes towards Coronavirus. 2020. [https://www.ipsos.com/sites/default/files/ct/news/documents/2020-05/fawcett\\_society\\_presentation.pdf](https://www.ipsos.com/sites/default/files/ct/news/documents/2020-05/fawcett_society_presentation.pdf) (accessed 10 Jul 2020).
- 29 Ipsos MORI, The Fawcett Society. 6 in 10 women finding it harder to stay positive day-to-day due to Coronavirus: Women more likely to bearing the emotional and impact of the pandemic . Fawcett Soc.

- 2020.<https://www.fawcettsociety.org.uk/Handlers/Download.ashx?IDMF=f173fde3-4edb-4c51-8453-7244e867ed90> (accessed 10 Jul 2020).
- 30 Thompson CW, Aspinall P, Bell S, *et al.* “It Gets You Away From Everyday Life”: Local Woodlands and Community Use—What Makes a Difference? *Landsc Res* 2007;**30**:109–46. doi:10.1080/0142639042000324794
- 31 Burgess J. Focusing on Fear: The Use of Focus Groups in a Project for the Community Forest Unit, Countryside Commission. 1996.
- 32 O’Brien L, Morris J. Well-being for all? The social distribution of benefits gained from woodlands and forests in Britain. *Local Environ Int J Justice Sustain* 2014;**19**:356–83. doi:10.1080/13549839.2013.790354
- 33 Public Health England. Disparities in the risk and outcomes from COVID-19. London: 2020. [www.facebook.com/PublicHealthEngland](http://www.facebook.com/PublicHealthEngland) (accessed 26 Jul 2020).
- 34 Office for National Statistics. Deaths registered weekly in England and Wales, provisional: week ending 10 July 2020. ONS. 2020.<https://www.ons.gov.uk/peoplepopulationandcommunity/birthsdeathsandmarriages/deaths/bulletins/deathsregisteredweeklyinenglandandwalesprovisional/latest#deaths-registered-by-age-group> (accessed 26 Jul 2020).
- 35 TNS. Scotland’s People and Nature Survey 2013/14. (Scottish Natural Heritage Commissioned Report No. 679). 2014.
- 36 Johnson B. Prime Minister’s statement on coronavirus (COVID-19): 16 March 2020. GOV.UK. 2020.<https://www.gov.uk/government/speeches/pm-statement-on-coronavirus-16-march-2020> (accessed 26 Jun 2020).
- 37 Office for National Statistics. Coronavirus and how people spent their time under lockdown. ONS. 2020.<https://www.ons.gov.uk/economy/nationalaccounts/satelliteaccounts/bulletins/coronavirusandhowpeoplespenttheirtimeunderrestrictions/28marchto26april2020> (accessed 16 Jul 2020).
- 38 Ravenscroft N, Markwell S. Ethnicity and the integration and exclusion of young people through urban park and recreation provision. *Manag Leis* 2000;**5**:135–50. doi:10.1080/13606710050084838

1  
2  
3  
4  
5  
6  
7  
8  
9  
10  
11  
12  
13  
14  
15  
16  
17  
18  
19  
20  
21  
22  
23  
24  
25  
26  
27  
28  
29  
30  
31  
32  
33  
34  
35  
36  
37  
38  
39  
40  
41  
42  
43  
44  
45  
46  
47  
48  
49  
50  
51  
52  
53  
54  
55  
56  
57  
58  
59  
60

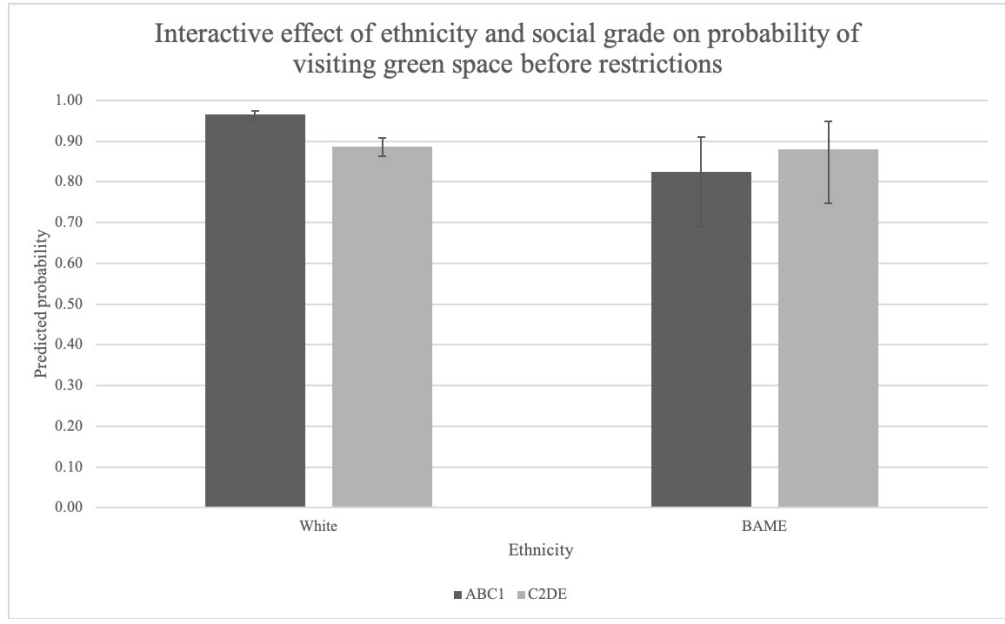

Figure 1: The significant interaction between social grade and ethnicity in their association with visiting green space before restrictions on movement, with 95% confidence interval bars.

202x124mm (144 x 144 DPI)

## Supplementary Materials

**Supplementary Table 1: Category mergers of the response categories (ethnicity, age, social grade, sex and dog ownership).**

|                      | <b>Original categories (Unweighted N)</b> | <b>New categories (Unweighted N)</b> |
|----------------------|-------------------------------------------|--------------------------------------|
| <b>Ethnicity</b>     | White British (1659)                      | White (1747)                         |
|                      | Any other white background (86)           |                                      |
|                      | White and Black Caribbean (6)             | BAME (87)                            |
|                      | White and Black African (4)               |                                      |
|                      | White and Asian (8)                       |                                      |
|                      | Any other mixed background (8)            |                                      |
|                      | Indian (17)                               |                                      |
|                      | Pakistani (5)                             |                                      |
|                      | Bangladeshi (4)                           |                                      |
|                      | Any other Asian background (3)            |                                      |
|                      | Black Caribbean (4)                       |                                      |
|                      | Black African (3)                         |                                      |
|                      | Any other black background (3)            |                                      |
|                      | Chinese (10)                              |                                      |
|                      | Other ethnic group (12)                   |                                      |
|                      | Prefer not to say (19)                    | Missing (418)                        |
|                      | Not answered (399)                        |                                      |
|                      |                                           |                                      |
|                      |                                           |                                      |
|                      | <b>Age</b>                                | 18-24 (165)                          |
| 25-34 (316)          |                                           | 25-64 (1497)                         |
| 35-44 (396)          |                                           |                                      |
| 45-54 (398)          |                                           |                                      |
| 55-64 (387)          |                                           |                                      |
| 65+ (590)            |                                           | 65+ (590)                            |
|                      |                                           |                                      |
| <b>Social grade</b>  | ABC1 (1419)                               |                                      |
|                      | C2DE (833)                                |                                      |
|                      |                                           |                                      |
| <b>Sex</b>           | Male (1018)                               |                                      |
|                      | Female (1234)                             |                                      |
|                      |                                           |                                      |
| <b>Dog ownership</b> | Yes (616)                                 |                                      |
|                      | No (1636)                                 |                                      |

**Supplementary Table 2: Change in green space visit frequency since restrictions by individual demographic and socio-economic characteristics (weighted).**

|                          | Visited green space in the year before restrictions |                | Visited green space after restrictions |                  | Green space visitation change since lockdown |                         |                            |
|--------------------------|-----------------------------------------------------|----------------|----------------------------------------|------------------|----------------------------------------------|-------------------------|----------------------------|
|                          | Yes (N=2014; 93%)                                   | No (N=158; 7%) | Yes (N=1086; 49%)                      | No (N=1123; 51%) | Increased (N=324; 15%)                       | Decreased (N=1375; 63%) | No difference (N=480; 22%) |
|                          | % (N)                                               | % (N)          | % (N)                                  | % (N)            | % (N)                                        | % (N)                   | % (N)                      |
| <b>Sex</b>               |                                                     |                |                                        |                  |                                              |                         |                            |
| <b>Male</b>              | 92% (963)                                           | 8% (88)        | 50% (529)                              | 50% (538)        | 15% (156)                                    | 61% (636)               | 24% (252)                  |
| <b>Female</b>            | 94% (1050)                                          | 6% (70)        | 49% (557)                              | 51% (585)        | 15% (167)                                    | 65% (739)               | 20% (228)                  |
| <b>Social grade</b>      |                                                     |                |                                        |                  |                                              |                         |                            |
| <b>ABC1</b>              | 95% (1186)                                          | 5% (59)        | 53% (667)                              | 47% (590)        | 18% (228)                                    | 63% (775)               | 19% (236)                  |
| <b>C2DE</b>              | 89% (828)                                           | 11% (99)       | 44% (419)                              | 56% (533)        | 10% (95)                                     | 64% (600)               | 26% (244)                  |
| <b>Age</b>               |                                                     |                |                                        |                  |                                              |                         |                            |
| <b>18-24</b>             | 91% (203)                                           | 9% (21)        | 50% (115)                              | 50% (117)        | 19% (43)                                     | 57% (126)               | 24% (54)                   |
| <b>25-64</b>             | 93% (1335)                                          | 7% (103)       | 51% (746)                              | 49% (712)        | 16% (232)                                    | 62% (895)               | 22% (314)                  |
| <b>65+</b>               | 93% (477)                                           | 7% (35)        | 43% (225)                              | 57% (294)        | 9% (48)                                      | 69% (354)               | 22% (112)                  |
| <b>Ethnicity</b>         |                                                     |                |                                        |                  |                                              |                         |                            |
| <b>White</b>             | 93% (1521)                                          | 7% (115)       | 47% (790)                              | 53% (877)        | 13% (212)                                    | 64% (1057)              | 23% (378)                  |
| <b>BAME</b>              | 85% (80)                                            | 15% (14)       | 44% (41)                               | 56% (52)         | 17% (15)                                     | 53% (47)                | 30% (27)                   |
| <b>Dog ownership</b>     |                                                     |                |                                        |                  |                                              |                         |                            |
| <b>Don't own a dog/s</b> | 92% (1443)                                          | 8% (119)       | 47% (749)                              | 53% (840)        | 16% (250)                                    | 64% (1003)              | 20% (314)                  |
| <b>Own a dog/s</b>       | 94% (571)                                           | 7% (40)        | 55% (338)                              | 46% (282)        | 12% (74)                                     | 61% (372)               | 27% (166)                  |

**Supplementary Table 3: Change in green space experience since restrictions by individual demographic and socio-economic characteristics (weighted).**

|                          | Using green spaces benefits my mental health more now |                                                  | Miss social interaction in green spaces now |                                                  | Do more physical activity in green spaces now |                                                  |
|--------------------------|-------------------------------------------------------|--------------------------------------------------|---------------------------------------------|--------------------------------------------------|-----------------------------------------------|--------------------------------------------------|
|                          | Agree (N=689; 65%)                                    | Disagree/neither agree nor disagree (N=368; 35%) | Agree (N=566; 54%)                          | Disagree/neither agree nor disagree (N=490; 46%) | Agree (N=309; 29%)                            | Disagree/neither agree nor disagree (N=746; 71%) |
|                          | % (N)                                                 | % (N)                                            | % (N)                                       | % (N)                                            | % (N)                                         | % (N)                                            |
| <b>Sex</b>               |                                                       |                                                  |                                             |                                                  |                                               |                                                  |
| <b>Male</b>              | 59% (301)                                             | 41% (211)                                        | 46% (238)                                   | 54% (278)                                        | 27% (138)                                     | 73% (375)                                        |
| <b>Female</b>            | 71% (387)                                             | 29% (157)                                        | 61% (328)                                   | 39% (211)                                        | 32% (171)                                     | 69% (371)                                        |
| <b>Social grade</b>      |                                                       |                                                  |                                             |                                                  |                                               |                                                  |
| <b>ABC1</b>              | 69% (452)                                             | 31% (206)                                        | 56% (365)                                   | 44% (292)                                        | 32% (208)                                     | 68% (447)                                        |
| <b>C2DE</b>              | 59% (237)                                             | 41% (162)                                        | 51% (201)                                   | 50% (197)                                        | 25% (101)                                     | 75% (299)                                        |
| <b>Age</b>               |                                                       |                                                  |                                             |                                                  |                                               |                                                  |
| <b>18-24</b>             | 60% (64)                                              | 40% (42)                                         | 61% (66)                                    | 39% (42)                                         | 46% (50)                                      | 55% (60)                                         |
| <b>25-64</b>             | 69% (500)                                             | 31% (229)                                        | 53% (383)                                   | 47% (342)                                        | 30% (216)                                     | 70% (508)                                        |
| <b>65+</b>               | 56% (125)                                             | 44% (97)                                         | 52% (116)                                   | 48% (106)                                        | 20% (43)                                      | 81% (178)                                        |
| <b>Ethnicity</b>         |                                                       |                                                  |                                             |                                                  |                                               |                                                  |
| <b>White</b>             | 63% (481)                                             | 37% (286)                                        | 51% (390)                                   | 49% (374)                                        | 26% (202)                                     | 74% (566)                                        |
| <b>BAME</b>              | 73% (29)                                              | 28% (11)                                         | 51% (21)                                    | 49% (20)                                         | 44% (17)                                      | 56% (22)                                         |
| <b>Dog ownership</b>     |                                                       |                                                  |                                             |                                                  |                                               |                                                  |
| <b>Don't own a dog/s</b> | 68% (498)                                             | 32% (232)                                        | 52% (379)                                   | 48% (351)                                        | 34% (248)                                     | 66% (479)                                        |
| <b>Own a dog/s</b>       | 58% (190)                                             | 42% (136)                                        | 57% (186)                                   | 43% (139)                                        | 19% (61)                                      | 81% (267)                                        |

STROBE Statement—Checklist of items that should be included in reports of *cross-sectional studies*

|                              | Item No | Recommendation                                                                                                                                                                                    | Page No                  |
|------------------------------|---------|---------------------------------------------------------------------------------------------------------------------------------------------------------------------------------------------------|--------------------------|
| <b>Title and abstract</b>    | 1       | (a) Indicate the study's design with a commonly used term in the title or the abstract                                                                                                            | P1                       |
|                              |         | (b) Provide in the abstract an informative and balanced summary of what was done and what was found                                                                                               | P2                       |
| <b>Introduction</b>          |         |                                                                                                                                                                                                   |                          |
| Background/rationale         | 2       | Explain the scientific background and rationale for the investigation being reported                                                                                                              | P3                       |
| Objectives                   | 3       | State specific objectives, including any prespecified hypotheses                                                                                                                                  | P3                       |
| <b>Methods</b>               |         |                                                                                                                                                                                                   |                          |
| Study design                 | 4       | Present key elements of study design early in the paper                                                                                                                                           | P4                       |
| Setting                      | 5       | Describe the setting, locations, and relevant dates, including periods of recruitment, exposure, follow-up, and data collection                                                                   | P4                       |
| Participants                 | 6       | (a) Give the eligibility criteria, and the sources and methods of selection of participants                                                                                                       | P4                       |
| Variables                    | 7       | Clearly define all outcomes, exposures, predictors, potential confounders, and effect modifiers. Give diagnostic criteria, if applicable                                                          | P4/5                     |
| Data sources/<br>measurement | 8*      | For each variable of interest, give sources of data and details of methods of assessment (measurement). Describe comparability of assessment methods if there is more than one group              | P4                       |
| Bias                         | 9       | Describe any efforts to address potential sources of bias                                                                                                                                         | P4, 6                    |
| Study size                   | 10      | Explain how the study size was arrived at                                                                                                                                                         | P4                       |
| Quantitative variables       | 11      | Explain how quantitative variables were handled in the analyses. If applicable, describe which groupings were chosen and why                                                                      | P5/6                     |
| Statistical methods          | 12      | (a) Describe all statistical methods, including those used to control for confounding                                                                                                             | P5/6                     |
|                              |         | (b) Describe any methods used to examine subgroups and interactions                                                                                                                               | P6                       |
|                              |         | (c) Explain how missing data were addressed                                                                                                                                                       | P4, 6                    |
|                              |         | (d) If applicable, describe analytical methods taking account of sampling strategy                                                                                                                | P4, 6                    |
|                              |         | (e) Describe any sensitivity analyses                                                                                                                                                             | -                        |
| <b>Results</b>               |         |                                                                                                                                                                                                   |                          |
| Participants                 | 13*     | (a) Report numbers of individuals at each stage of study—eg numbers potentially eligible, examined for eligibility, confirmed eligible, included in the study, completing follow-up, and analysed | Supplementary Tables 1-3 |
|                              |         | (b) Give reasons for non-participation at each stage                                                                                                                                              | -                        |
|                              |         | (c) Consider use of a flow diagram                                                                                                                                                                | -                        |

|                          |     |                                                                                                                                                                                                              |                                               |
|--------------------------|-----|--------------------------------------------------------------------------------------------------------------------------------------------------------------------------------------------------------------|-----------------------------------------------|
| Descriptive data         | 14* | (a) Give characteristics of study participants (eg demographic, clinical, social) and information on exposures and potential confounders                                                                     | P5/6, Supplementary Table 1                   |
|                          |     | (b) Indicate number of participants with missing data for each variable of interest                                                                                                                          | Supplementary Table 1                         |
| Outcome data             | 15* | Report numbers of outcome events or summary measures                                                                                                                                                         | Tables 2 and 3 + Supplementary Tables 2 and 3 |
| Main results             | 16  | (a) Give unadjusted estimates and, if applicable, confounder-adjusted estimates and their precision (eg, 95% confidence interval). Make clear which confounders were adjusted for and why they were included | P6-9                                          |
|                          |     | (b) Report category boundaries when continuous variables were categorized                                                                                                                                    | -                                             |
|                          |     | (c) If relevant, consider translating estimates of relative risk into absolute risk for a meaningful time period                                                                                             | -                                             |
| Other analyses           | 17  | Report other analyses done—eg analyses of subgroups and interactions, and sensitivity analyses                                                                                                               | P7                                            |
| <b>Discussion</b>        |     |                                                                                                                                                                                                              |                                               |
| Key results              | 18  | Summarise key results with reference to study objectives                                                                                                                                                     | P9                                            |
| Limitations              | 19  | Discuss limitations of the study, taking into account sources of potential bias or imprecision. Discuss both direction and magnitude of any potential bias                                                   | P12                                           |
| Interpretation           | 20  | Give a cautious overall interpretation of results considering objectives, limitations, multiplicity of analyses, results from similar studies, and other relevant evidence                                   | P9, 11, 12                                    |
| Generalisability         | 21  | Discuss the generalisability (external validity) of the study results                                                                                                                                        | P12                                           |
| <b>Other information</b> |     |                                                                                                                                                                                                              |                                               |
| Funding                  | 22  | Give the source of funding and the role of the funders for the present study and, if applicable, for the original study on which the present article is based                                                | P13                                           |

\*Give information separately for exposed and unexposed groups.

**Note:** An Explanation and Elaboration article discusses each checklist item and gives methodological background and published examples of transparent reporting. The STROBE checklist is best used in conjunction with this article (freely available on the Web sites of PLoS Medicine at <http://www.plosmedicine.org/>, Annals of Internal Medicine at <http://www.annals.org/>, and Epidemiology at <http://www.epidem.com/>). Information on the STROBE Initiative is available at [www.strobe-statement.org](http://www.strobe-statement.org).



# BMJ Open

**Change in time spent visiting and experiences of green space following restrictions on movement during the COVID-19 pandemic: A nationally representative cross-sectional study of UK adults.**

|                                 |                                                                                                                                                                                                                                                                                                                                                                          |
|---------------------------------|--------------------------------------------------------------------------------------------------------------------------------------------------------------------------------------------------------------------------------------------------------------------------------------------------------------------------------------------------------------------------|
| Journal:                        | <i>BMJ Open</i>                                                                                                                                                                                                                                                                                                                                                          |
| Manuscript ID                   | bmjopen-2020-044067.R1                                                                                                                                                                                                                                                                                                                                                   |
| Article Type:                   | Original research                                                                                                                                                                                                                                                                                                                                                        |
| Date Submitted by the Author:   | 02-Nov-2020                                                                                                                                                                                                                                                                                                                                                              |
| Complete List of Authors:       | Burnett, Hannah; University of Glasgow, MRC/CSO Social and Public Health Sciences Unit<br>Olsen, Jonathan; University of Glasgow, MRC/CSO Social and Public Health Sciences Unit<br>Nicholls, Natalie; University of Glasgow, MRC/CSO Social and Public Health Sciences Unit<br>Mitchell, Richard; University of Glasgow, MRC/CSO Social and Public Health Sciences Unit |
| <b>Primary Subject Heading</b>: | Public health                                                                                                                                                                                                                                                                                                                                                            |
| Secondary Subject Heading:      | Mental health                                                                                                                                                                                                                                                                                                                                                            |
| Keywords:                       | MENTAL HEALTH, COVID-19, PUBLIC HEALTH                                                                                                                                                                                                                                                                                                                                   |
|                                 |                                                                                                                                                                                                                                                                                                                                                                          |

SCHOLARONE™  
Manuscripts



I, the Submitting Author has the right to grant and does grant on behalf of all authors of the Work (as defined in the below author licence), an exclusive licence and/or a non-exclusive licence for contributions from authors who are: i) UK Crown employees; ii) where BMJ has agreed a CC-BY licence shall apply, and/or iii) in accordance with the terms applicable for US Federal Government officers or employees acting as part of their official duties; on a worldwide, perpetual, irrevocable, royalty-free basis to BMJ Publishing Group Ltd ("BMJ") its licensees and where the relevant Journal is co-owned by BMJ to the co-owners of the Journal, to publish the Work in this journal and any other BMJ products and to exploit all rights, as set out in our [licence](#).

The Submitting Author accepts and understands that any supply made under these terms is made by BMJ to the Submitting Author unless you are acting as an employee on behalf of your employer or a postgraduate student of an affiliated institution which is paying any applicable article publishing charge ("APC") for Open Access articles. Where the Submitting Author wishes to make the Work available on an Open Access basis (and intends to pay the relevant APC), the terms of reuse of such Open Access shall be governed by a Creative Commons licence – details of these licences and which [Creative Commons](#) licence will apply to this Work are set out in our licence referred to above.

Other than as permitted in any relevant BMJ Author's Self Archiving Policies, I confirm this Work has not been accepted for publication elsewhere, is not being considered for publication elsewhere and does not duplicate material already published. I confirm all authors consent to publication of this Work and authorise the granting of this licence.

1  
2  
3  
4  
5  
6  
7  
8  
9  
10  
11  
12  
13  
14  
15  
16  
17  
18  
19  
20  
21  
22  
23  
24  
25  
26  
27  
28  
29  
30  
31  
32  
33  
34  
35  
36  
37  
38  
39  
40  
41  
42  
43  
44  
45  
46  
47  
48  
49  
50  
51  
52  
53  
54  
55  
56  
57  
58  
59  
60

1 **Change in time spent visiting and experiences of green space following**  
2 **restrictions on movement during the COVID-19 pandemic: A nationally**  
3 **representative cross-sectional study of UK adults.**

4  
5 **Hannah Burnett<sup>1</sup>, Jonathan R Olsen<sup>1</sup>, Natalie Nicholls<sup>1</sup>, Richard Mitchell<sup>1</sup>**  
6 **<sup>1</sup>MRC/CSO Social and Public Health Sciences Unit, University of Glasgow, Berkeley**  
7 **Square, 99 Berkeley Street, Glasgow, G3 7HR, United Kingdom.**

8  
9 **Correspondence:**

10 **Hannah Burnett**

11 **MRC/CSO Social and Public Health Sciences Unit,**

12 **University of Glasgow,**

13 **Berkeley Square,**

14 **99 Berkeley Street,**

15 **Glasgow,**

16 **G3 7HR.**

17 **Email: h.burnett.1@research.gla.ac.uk**

18  
19 **Key words: mental health; COVID-19; public health.**

20  
21 **Word Count: 4,000**

22 **Tables : 4**

23 **Figures : 1**

24 **Supplementary tables: 5**

## 25 ABSTRACT

26  
27 **Objectives** Green space positively influences health and well-being, however inequalities  
28 in use of green space are prevalent. Movement restrictions enforced due to the COVID-19  
29 pandemic could have exacerbated existing inequalities regarding who visits green space.  
30 Therefore, this study aimed to explore how movement restrictions have changed the time  
31 spent visiting green space and experience of green space in the United Kingdom (UK) and  
32 how these differed by individual-level demographic characteristics.

33  
34 **Design and outcome measures** A nationally representative cross-sectional survey  
35 administered through YouGov between 30<sup>th</sup> April–1<sup>st</sup> May 2020. Data were collected on the  
36 time spent visiting green space and change in the experience of green space, including  
37 missing social interaction, increased physical activity, and feeling greater mental health  
38 benefits in green space. Demographic information was collected on sex, age, ethnicity, social  
39 grade and dog ownership. Associations between specific outcome variables and predictors  
40 were assessed using logistic regression.

41  
42 **Setting** United Kingdom, with population weights applied.

43  
44 **Participants** 2,252 adults aged 18 years and over.

45 **Results** Overall, 63% of respondents reported a decrease in time spent visiting green space  
46 following movement restrictions. Lower social grade respondents were less likely to visit  
47 green space before *and* after restrictions were enforced (OR:0.35 (95% CI:0.24-0.51);  
48 OR:0.77 (95% CI:0.63-0.95)). Female respondents were more likely than male respondents to  
49 agree that green space benefitted their mental health more following restrictions (PP:0.70 vs.  
50 0.59). Older (65+) respondents were less likely than middle age (25-64 years) respondents to  
51 have visited green space following the restrictions (OR:0.79 (95% CI:0.63-0.98)).

52 **Conclusions** Inequalities in green space use were sustained, and possibly exacerbated,  
53 during movement restrictions. Our findings emphasise the importance of green spaces  
54 remaining open globally in any future ‘lockdowns’/pandemics. Further investigation is  
55 required to determine how visit patterns and experiences change through the different stages  
56 of the COVID-19 pandemic in the UK.

57 **(Word Count: 300)**

### 58 **Strengths and Limitations of this study**

- 59 • Our data are currently the only existing data covering change in the time spent visiting  
60 green space and experiences of green space for the UK population following the  
61 movement restrictions enforced due to the COVID-19 pandemic.
- 62 • The sample is nationally representative of UK adults.
- 63 • Collecting data on *both* time spent visiting green space and change in experience of green  
64 space during the movement restrictions is a strength of this study, compared to other  
65 surveys exploring change in green space use during the COVID-19 pandemic, including  
66 the Google COVID-19 Community Mobility Reports and Natural England’s People and  
67 Nature Survey.
- 68

- 1  
2  
3  
4 69 • The data collected for this study were from a cross-sectional survey, therefore it is not  
5 70 possible to demonstrate causality between change in green space use and experiences and  
6 71 the demographic data.  
7 72 • Certain variable response categories were necessarily recategorised for analysis, which  
8 73 meant that some distinctiveness across groups were lost, particularly for the ethnicity and  
9 74 age variables.  
10 75

## 11 76 INTRODUCTION

12 77  
13 78 Evidence suggests that exposure to green space has a positive influence on health and well-  
14 79 being.[1,2] Green space use is associated with increased levels of social interaction and  
15 80 physical activity, and decreased levels of all-cause mortality, loneliness and stress.[3–5]  
16 81 Additionally, there is evidence that contact with green space may disproportionately benefit  
17 82 disadvantaged populations, reducing health inequalities and therefore weakening the effects  
18 83 of poverty – known as the ‘equigenic’ effect.[6,7]  
19 84

20 85 The health impacts of contact with green spaces are quite well studied by both observational  
21 86 and experimental designs. There is rather less literature on the levels of, motivations for, and  
22 87 barriers to visiting green spaces in the first place. Recent surveys by Natural England and  
23 88 Scottish Natural Heritage have found that 74% of the English population and 70% of the  
24 89 Scottish population visit green space ‘frequently’ (once a month or more often). In both  
25 90 countries, the top three reasons stated for frequent green space use were health/exercise, dog  
26 91 walking, and to relax/unwind.[8,9] Further research exploring the motivations and reasons for  
27 92 visiting green space found that visitation frequency is affected by an individual’s feelings of  
28 93 nature connectedness, as well as their childhood exposure to nature.[10–12]. It is important to  
29 94 note that substantial inequalities in green space use have also been reported, with studies  
30 95 finding that females, older people and those from less advantaged socioeconomic positions  
31 96 (SEP) are more likely to be infrequent users than their male, younger and higher SEP  
32 97 counterparts.[9,13–15]  
33 98

34 99 In 2020, the United Kingdom (UK) experienced major disruption to everyday life due to the  
35 100 novel coronavirus disease 2019 (COVID-19) pandemic. COVID-19 is an infectious disease  
36 101 first identified in the city of Wuhan, China in December 2019.[16] As a response to the  
37 102 COVID-19 outbreak, the UK announced a series of movement restrictions from 23<sup>rd</sup> March  
38 103 2020. These included rules designed to increase social distancing, meaning that people could  
39 104 only leave their households to make ‘essential trips’ for food, medication and exercise.[17]  
40 105 Recent studies have highlighted the negative effects of COVID-19 on the UK population’s  
41 106 mental health and wellbeing, which are likely to be profound and long-lasting.[18] Research  
42 107 exploring the wider health effects of COVID-19 suggest that the negative indirect effects are  
43 108 being borne disproportionately by people who have fewer resources and poorer health.[19] If  
44 109 natural environments usually act to mitigate the connections between adversity and poor  
45 110 health,[6,7] it is important to assess the extent to which lockdown affected both use and  
46 111 experience of such environments. Future lockdowns and movement restrictions are highly  
47 112 likely as second, third and perhaps fourth waves of the pandemic take place around the world.  
48 113

49 114 The aim of this research was to explore changes in the time spent visiting green space and  
50 115 experience of visits to green space among the UK population following movement  
51 116 restrictions. The sociodemographic characteristics focused on were those identified by the  
52 117 literature as being most consistent markers of inequality in use. The research questions were:

118

119

120

121

122

123

124

125

126

127

128

129

130

131

132

133

134

135

136

137

138

139

140

141

142

143

144

145

146

147

148

149

150

151

152

153

154

155

- 1) How did time spent visiting green space change following movement restrictions, compared with before, and for whom?
- 2) How did experiences of visits to green space change following the restrictions, and did any change vary by sex, social grade, age, ethnicity and dog ownership? Specifically,
  - a) Did respondents feel that green space benefitted their mental health more since restrictions than before?
  - b) Did respondents miss social interaction in green space more following movement restrictions?
  - c) Had physical activity increased following movement restrictions?

## METHODS

### Survey design and sample

An online cross-sectional survey was administered by YouGov between 30<sup>th</sup> April and 1<sup>st</sup> May 2020.[20] Questions were answered by a sample of 2,252 adults from the UK (aged 18 and over). The sample was drawn from a panel of over 800,000 individuals who specifically opted in to participate in online research activities. Sample members were randomly selected at random from the panel and sent an email providing a survey link. Table 1 shows the themes and specific survey instruments analysed in this paper. Only the respondents that visited green space following movement restrictions were asked the questions regarding change in experience of green space. Demographic information about participants was also collected (including sex, age and social grade, which was classified by occupation).[21,22] Although the sample was reasonably large, small numbers in variable response categories necessitated some category mergers (Table 1 and Supplementary Table 1).

The survey covered adults from across the UK, with respondents from England (N=1,875), Scotland (N=209), Wales (N=107), and Northern Ireland (N=61). Weightings were applied to render the sample representative of UK adults (detailed below). When the survey was distributed, the same movement restrictions were implemented across the UK. These included only leaving home for limited purposes, such as medical needs, shopping for basic necessities (food and medicine), and exercising once a day alone/with members of your household.[23] Since then, the individual parliaments/assemblies representing these countries have imposed different COVID-19 policies.

**Table 1:** Survey themes and specific items analysed, including variables recategorised.

| Themes                                                  | Question/statement                                                                                                                                                                                                                             | Potential responses                                         | Recategorised                                             |
|---------------------------------------------------------|------------------------------------------------------------------------------------------------------------------------------------------------------------------------------------------------------------------------------------------------|-------------------------------------------------------------|-----------------------------------------------------------|
| Change in the amount of time spent visiting green space | <i>"Did you EVER visit a green space in the year before the movement restrictions were enforced in the UK?"</i>                                                                                                                                | Yes, I did<br>No, I didn't<br>Don't know/<br>can't recall   | -<br><i>Don't know/can't recall excluded (N=80, 3.5%)</i> |
|                                                         | <i>"Please think about your behaviour since the UK enforced a 'lock down' to restrict movement, as a result of the current Coronavirus (COVID-19) outbreak (i.e. since 23rd March 2020). Have you visited a green space since the movement</i> | Yes, I have<br>No, I haven't<br>Don't know/<br>can't recall | -                                                         |

|                                                                                                           |                                                                                                                                                                                                     |                                                                                                                                         |                                                                                                                                                                                                          |
|-----------------------------------------------------------------------------------------------------------|-----------------------------------------------------------------------------------------------------------------------------------------------------------------------------------------------------|-----------------------------------------------------------------------------------------------------------------------------------------|----------------------------------------------------------------------------------------------------------------------------------------------------------------------------------------------------------|
|                                                                                                           | <i>restrictions have been enforced in the UK?"</i>                                                                                                                                                  |                                                                                                                                         | <i>Don't know/can't recall excluded (N=43, 1.9%)</i>                                                                                                                                                     |
|                                                                                                           | <i>"How much, if at all, has the amount of time that you have spent visiting green spaces changed since the 'lock down' movement restrictions began (i.e. 23rd March 2020) compared to before?"</i> | Increased a lot<br>Increased a little<br>No difference<br>Decreased a little<br>Decreased a lot<br>Don't know                           | 'Increased' (increased a lot and increased a little)<br>'Same' (no difference)<br>'Decreased' (decreased a lot and decreased a little)<br><br><i>Don't know excluded (N=74, 3.3%)</i>                    |
| Experience change (If respondent had visited a green space since the movement restrictions were enforced) | <i>"I feel that being in green spaces benefits my mental health <u>more now</u>, than before the movement restrictions were in place"</i>                                                           | Strongly agree<br>Slightly agree<br>Neither agree nor disagree<br>Slightly disagree<br>Strongly disagree<br>Don't know/<br>can't recall | 'Agree' (strongly agree and slightly agree)<br>'Neither' (neither agree nor disagree)<br>'Disagree' (slightly disagree and strongly disagree)<br><br><i>Don't know/can't recall excluded (N=7, 0.6%)</i> |
|                                                                                                           | <i>"I have missed seeing and/ or talking with people in green spaces <u>since</u> the movement restrictions were introduced"</i>                                                                    | Strongly agree<br>Slightly agree<br>Neither agree nor disagree<br>Slightly disagree<br>Strongly disagree<br>Don't know/<br>can't recall | 'Agree' (strongly agree and slightly agree)<br>'Neither' (Neither agree nor disagree)<br>'Disagree' (slightly disagree and strongly disagree)<br><br><i>Don't know/can't recall excluded (N=8, 0.8%)</i> |
|                                                                                                           | <i>"I do more physical activity in green spaces <u>now</u>, than I did before the movement restrictions were introduced"</i>                                                                        | Strongly agree<br>Slightly agree<br>Neither agree nor disagree<br>Slightly disagree<br>Strongly disagree<br>Don't know/<br>can't recall | 'Agree' (strongly agree and slightly agree)<br>'Neither' (Neither agree nor disagree)<br>'Disagree' (slightly disagree and strongly disagree)<br><br><i>Don't know/can't recall excluded (N=9, 0.8%)</i> |

*Don't know/ can't recall responses were all excluded from analysis (weighted counts and proportions reported above).*

## Demographic variables

Individual level demographic and socio-economic characteristics were captured from the survey, as follows: sex (male, female); age group (18-24 years, 25-64 years, 65+ years); ethnicity (White, Black, Asian and minority ethnic (BAME)); dog ownership (Yes, No); and social grade (ABC1, C2DE), derived by YouGov from combined occupational social grade categories. ABC1 was the higher social grade, and included non-manual workers, for example, senior managers and owners of small establishments. C2DE was the lower social grade, and included all manual workers, for example, shop assistants and labourers.[24] Hereafter, social grade will be described as higher and lower social grade.

## Patient and Public Involvement

There was no direct patient or public involvement in this study.

## 173 **Analyses**

### 174 175 **Descriptive statistics**

176  
177 The count and proportion of respondents who had: visited green space before and after  
178 movement restrictions were enforced; increased or decreased visitation; and agreed or  
179 disagreed with the three change in experience statements (Table 1) are presented. These were  
180 also explored by sex, age, ethnicity, dog ownership and social grade.

### 182 **Statistical analysis**

183  
184 Binary logistic regression analyses were conducted to assess the association between the  
185 individual predictor variables and the following two outcomes:

- 187 1. having visited green space in the year before movement restrictions were enforced;
- 188 2. having visited green space since movement restrictions were enforced, with this  
189 analysis being restricted to those who had reported visiting green space before  
190 movement restrictions.

191  
192 The associations between the individual predictor variables and each of the following  
193 outcomes were also assessed using multinomial logistic regression or, if appropriate, ordinal  
194 logistic regression, with results presented as predicted probabilities (PP):

- 196 1. Change in green space visitation following movement restrictions;
- 197 2. Levels of agreement that green space benefits their mental health more now (since  
198 movement restrictions compared to before);
- 199 3. Levels of agreement that they miss seeing/talking to people in green space now (since  
200 movement restrictions compared to before); and
- 201 4. Levels of agreement that they do more physical activity in green space now (since  
202 movement restrictions compared to before).

203  
204 The results of the binary logistic regression analyses were expressed as odds ratios (OR) with  
205 95% confidence intervals (CIs). Other results are presented as predicted outcome group  
206 probabilities for each variable. Univariate models for each predictor were conducted first,  
207 followed by a fully adjusted model containing all predictors for each outcome. Weightings  
208 were calculated by YouGov, with the final data weighted to match the national profile of all  
209 adults aged 18 and over and applied during analyses to render the sample representative of  
210 UK adults.[22] All analyses were conducted in R v3.5.1,[25], and the *brant* package,[26],  
211 was used to check that the proportionality of odds assumption for ordinal logistic regression  
212 was not violated.[27] A full R script is available on GitHub.[28]

### 214 **Interactions**

215  
216 Given existing literature,[9,13,29,30] we expected some interactions between the  
217 demographic variables sex, age, social grade, and ethnicity, in their relationships with change  
218 in visit time and experience of green space following movement restrictions. We therefore  
219 explored interactions between each of these demographic variables for every model,  
220 assessing their significance via Wald tests, and then producing predicted probabilities to aid  
221 interpretation of the significant interactions.



## RESULTS

### Descriptive statistics

93% of all respondents had visited green space in the year before movement restrictions were enforced. In contrast, 53% of respondents reported visiting green space following movement restrictions. 63% of respondents reported that the amount of time they spent in green space had decreased since movement restrictions compared to before, with 15% reporting an increase, and 22% reporting no difference in the time spent visiting green space (Supplementary Table 2).

A greater proportion of respondents agreed (65%) than disagreed (10%) or neither agreed nor disagreed (25%) that green space benefited their mental health more following movement restrictions compared to before. More respondents agreed (54%) that they missed social interaction in green space more since movement restrictions, than disagreed (19%) or neither agreed nor disagreed (27%). 39% of respondents disagreed that they had increased physical activity in green space since movement restrictions, compared to 29% who agreed and 32% that neither agreed nor disagreed (Supplementary Table 3).

### Change in visitation time

#### Visiting green space before movement restrictions

In the adjusted logistic regression model for visiting green space in the year before movement restrictions were enforced (Table 2), only two variables had significant associations ( $p < 0.05$ ). Lower social grade respondents (OR:0.35 (95%CI:0.24-0.51)) and BAME (OR:0.43 (95%CI:0.23-0.80)) respondents had lower odds of visiting green space before movement restrictions, compared to higher social grade and white respondents.

#### Visiting green space following movement restrictions

Respondents in the lower social grade group were less likely to have visited green space than respondents in the higher social grade group (OR:0.77 (95%CI:0.63-0.95)) (Table 2). Older respondents (65+) were also less likely than middle age respondents (25-64) to have visited green space following the movement restrictions (OR:0.79 (95% CI:0.63-0.98)). Respondents who owned a dog/s were more likely than respondents who did not to have visited green space after movement restrictions were enforced (OR:1.42 (95%CI:1.14-1.78)).

### Change in time spent visiting green space

Lower social grade respondents were less likely (had a lower predicted probability) than higher social grade respondents to report increased visits following movement restrictions (PP:0.09 vs. 0.16)(Table 3). Older respondents (aged 65+) were the least likely to report increased green space visitations (PP:0.09(65+) vs. 0.14(25-64) and 0.21(18-24)). Sex was significantly associated with *decreased* visits. Females were more likely (had a higher predicted probability) to report decreased green space visits compared to males (PP:0.67 vs. 0.62)(Table 3). Respondents without a dog/s were more likely to report decreased visitations to green space compared to dog owners (PP:0.66 vs. 0.62).

271

## 272 Interaction effects

273

274 Six interactions were significant ( $p < 0.05$ ); one between social grade and ethnicity in their  
275 association with visiting green space before movement restrictions. Two between age and  
276 ethnicity, in their association with visiting green spaces since movement restrictions and with  
277 *increased* visits since movement restrictions. The three experience outcomes (mental health  
278 benefits, miss social interaction and increased physical activity) had significant interactions  
279 between social grade and age.

280

281 Higher social grade white respondents had the highest probability of visiting green space  
282 before restrictions, but lower social grade BAME respondents were more likely to have  
283 visited green space before restrictions than the higher social grade BAME respondents  
284 (Supplementary Table 4). Young BAME respondents had a higher probability of visiting  
285 green space and reporting increased visits following restrictions compared to white and older  
286 BAME respondents (Figure 1). Older BAME and white respondents had a higher probability  
287 of reporting decreased visits following movement restrictions than their corresponding  
288 middle age respondents. However, the number of BAME respondents, especially young and  
289 older BAME respondents, in this sample was small and these results should be interpreted  
290 with caution.

291

292 For the interactions associated with the experience outcomes, younger respondents from the  
293 higher social grade group had the highest probability of agreeing both that green space  
294 benefitted their mental health more, and that they missed social interaction in green space,  
295 following the movement restrictions. In contrast, younger respondents in the lower social  
296 grade group had the highest probability of disagreeing that mental health benefitted their  
297 mental health more. Older respondents in the lower social grade group had a higher  
298 probability of agreeing that they missed social interaction in green space than younger  
299 respondents. Finally, younger respondents had the highest probability of agreeing that they  
300 had increased physical activity following the movement restrictions compared to the older  
301 respondents in both social grade groups (Supplementary Table 5).

302

1  
2  
3  
4  
5  
6  
7  
8  
9  
10  
11  
12  
13  
14  
15  
16  
17  
18  
19  
20  
21  
22  
23  
24  
25  
26  
27  
28  
29  
30  
31  
32  
33  
34  
35  
36  
37  
38  
39  
40  
41  
42  
43  
44  
45  
46

303 **Table 2:** Adjusted binary logistic regression models predicting green space visit before and after the movement restrictions were enforced. OR =  
304 odds ratio; CI = confidence intervals;  $p < 0.05$ .  
305

|                      | Visited green space in the year before restrictions (yes) |         | Visited green space after restrictions (yes & visited green space before restrictions) |         |
|----------------------|-----------------------------------------------------------|---------|----------------------------------------------------------------------------------------|---------|
|                      | Adjusted                                                  |         | Adjusted                                                                               |         |
|                      | OR (95% CI)                                               | p-value | OR (95% CI)                                                                            | p-value |
| <b>Sex</b>           |                                                           |         |                                                                                        |         |
| <b>Male (ref)</b>    |                                                           |         |                                                                                        |         |
| <b>Female</b>        | 1.35 (0.94-1.95)                                          | 0.109   | 0.88 (0.72-1.07)                                                                       | 0.205   |
| <b>Social grade</b>  |                                                           |         |                                                                                        |         |
| <b>ABC1 (ref)</b>    |                                                           |         |                                                                                        |         |
| <b>C2DE</b>          | 0.35 (0.24-0.51)                                          | <0.001  | 0.77 (0.63-0.95)                                                                       | 0.013   |
| <b>Age</b>           |                                                           |         |                                                                                        |         |
| <b>18-24</b>         | 2.92 (1.00-8.57)                                          | 0.051   | 0.81 (0.54-1.21)                                                                       | 0.297   |
| <b>25-64 (ref)</b>   |                                                           |         |                                                                                        |         |
| <b>65+</b>           | 1.22 (0.80-1.85)                                          | 0.353   | 0.79 (0.63-0.98)                                                                       | 0.035   |
| <b>Ethnicity</b>     |                                                           |         |                                                                                        |         |
| <b>White (ref)</b>   |                                                           |         |                                                                                        |         |
| <b>BAME</b>          | 0.43 (0.23-0.80)                                          | 0.007   | 1.06 (0.67-1.68)                                                                       | 0.799   |
| <b>Dog ownership</b> |                                                           |         |                                                                                        |         |
| <b>No (ref)</b>      |                                                           |         |                                                                                        |         |
| <b>Yes</b>           | 1.29 (0.83-2.00)                                          | 0.260   | 1.42 (1.14-1.78)                                                                       | 0.002   |

307

308

309

**Table 3:** Multinomial logistic regression models predicting change in time visiting green space and levels of agreement that green space benefits their mental health more now (since movement restrictions were enforced compared to before). **Significant predicted probabilities;  $p < 0.05$ .**

|                      |        | Change in time spent visiting green space |      |             |                  | Using green spaces benefits my mental health more now |         |             |                  |
|----------------------|--------|-------------------------------------------|------|-------------|------------------|-------------------------------------------------------|---------|-------------|------------------|
|                      |        | Decreased                                 | Same | Increased   | p-value          | Agree                                                 | Neither | Disagree    | p-value          |
| <i>Sex</i>           | Male   | <b>0.62</b>                               | 0.25 | 0.13        | <i>0.041</i>     | <b>0.59</b>                                           | 0.31    | 0.10        | <i>0.004</i>     |
|                      | Female | <b>0.67</b>                               | 0.20 | 0.12        |                  | <b>0.70</b>                                           | 0.22    | 0.09        |                  |
| <i>Social grade</i>  | ABC1   | <b>0.65</b>                               | 0.19 | <b>0.16</b> | <i>&lt;0.001</i> | <b>0.68</b>                                           | 0.24    | 0.09        | <i>0.048</i>     |
|                      | C2DE   | <b>0.64</b>                               | 0.27 | <b>0.09</b> |                  | <b>0.59</b>                                           | 0.31    | 0.10        |                  |
| <i>Age</i>           | 18-24  | 0.57                                      | 0.22 | 0.21        | <i>0.004</i>     | 0.55                                                  | 0.20    | <b>0.25</b> | <i>&lt;0.001</i> |
|                      | 25-64  | 0.63                                      | 0.22 | 0.14        |                  | 0.68                                                  | 0.22    | 0.10        |                  |
|                      | 65+    | 0.69                                      | 0.22 | <b>0.09</b> |                  | <b>0.55</b>                                           | 0.38    | <b>0.06</b> |                  |
| <i>Ethnicity</i>     | White  | 0.22                                      | 0.65 | 0.12        | 0.167            | 0.64                                                  | 0.26    | 0.10        | 0.063            |
|                      | BAME   | 0.30                                      | 0.56 | 0.14        |                  | 0.73                                                  | 0.25    | 0.02        |                  |
| <i>Dog ownership</i> | No     | <b>0.66</b>                               | 0.21 | <b>0.13</b> | <i>0.003</i>     | 0.67                                                  | 0.24    | 0.09        | 0.117            |
|                      | Yes    | <b>0.62</b>                               | 0.28 | <b>0.10</b> |                  | 0.59                                                  | 0.30    | 0.11        |                  |

310 **Table 4:** Multinomial logistic regression models predicting levels of agreement that respondents missed seeing/talking to people in green space  
 311 more since movement restrictions were enforced compared to before, and levels of agreement that respondents do more physical activity in  
 312 green space following the movement restrictions. **Significant predicted probabilities;  $p < 0.05$ .**

|                      |               | Miss social interaction in green spaces now |         |          |          | Do more physical activity in green spaces now |         |             |          |
|----------------------|---------------|---------------------------------------------|---------|----------|----------|-----------------------------------------------|---------|-------------|----------|
|                      |               | Agree                                       | Neither | Disagree | p-value  | Agree                                         | Neither | Disagree    | p-value  |
| <i>Sex</i>           | <b>Male</b>   | 0.45                                        | 0.30    | 0.25     | $<0.001$ | 0.24                                          | 0.37    | 0.40        | 0.096    |
|                      | <b>Female</b> | <b>0.58</b>                                 | 0.26    | 0.16     |          | 0.27                                          | 0.29    | 0.43        |          |
| <i>Social grade</i>  | <b>ABC1</b>   | 0.53                                        | 0.27    | 0.20     | 0.256    | 0.27                                          | 0.31    | 0.42        | 0.307    |
|                      | <b>C2DE</b>   | 0.48                                        | 0.31    | 0.21     |          | 0.23                                          | 0.36    | 0.41        |          |
| <i>Age</i>           | <b>18-24</b>  | 0.59                                        | 0.23    | 0.18     | 0.672    | 0.44                                          | 0.23    | 0.33        | $0.002$  |
|                      | <b>25-64</b>  | 0.51                                        | 0.28    | 0.21     |          | 0.29                                          | 0.31    | 0.40        |          |
|                      | <b>65+</b>    | 0.53                                        | 0.30    | 0.18     |          | <b>0.18</b>                                   | 0.38    | 0.45        |          |
| <i>Ethnicity</i>     | <b>White</b>  | 0.52                                        | 0.28    | 0.20     | 0.802    | 0.25                                          | 0.32    | 0.42        | 0.063    |
|                      | <b>BAME</b>   | 0.52                                        | 0.31    | 0.16     |          | 0.33                                          | 0.44    | <b>0.22</b> |          |
| <i>Dog Ownership</i> | <b>No</b>     | 0.50                                        | 0.30    | 0.20     | 0.295    | 0.31                                          | 0.30    | 0.39        | $<0.001$ |
|                      | <b>Yes</b>    | 0.55                                        | 0.25    | 0.20     |          | <b>0.17</b>                                   | 0.38    | 0.46        |          |

1  
2  
3 3134 314 **Change in visit experience**

5 315

6 316 **Mental health benefits**

7 317

8 318 Females were more likely to agree than males that being in green space benefitted their  
9 319 mental health more following movement restrictions than before (PP:0.70 vs. 0.59). Higher  
10 320 social grade respondents were more likely to agree than lower social grade respondents  
11 321 (PP:0.68 vs. 0.59). Younger respondents were more likely to disagree that being in green  
12 322 space benefitted their mental health more following movement restrictions than before, whilst  
13 323 older respondents were less likely to disagree (PP:0.25(18-24) vs. 0.06(65+) and 0.10(25-  
14 324 64))(Table 3).

15 325

16 326 **Missed social interaction**

17 327

18 328 Female respondents were more likely to agree that they missed seeing and talking with other  
19 329 people in green space since movement restrictions compared to before than male respondents  
20 330 (PP:0.58 vs. 0.45)(Table 4).

21 331

22 332 **Increased physical activity**

23 333

24 334 Older respondents were less likely to agree that they had increased physical activity  
25 335 following movement restrictions (PP:0.18(65+) vs. 0.20(25-64) and 0.44(18-24)).  
26 336 Respondents who owned a dog/s were less likely than respondents without a dog/s to agree  
27 337 (PP:0.17 vs. 0.31)(Table 4).

28 338

29 339 **DISCUSSION**

30 340

31 341 Our findings suggest that inequalities in use of green space between demographic groups  
32 342 were sustained following movement restrictions, with lower social grade individuals less  
33 343 likely than higher social grade individuals to have visited green space before and since  
34 344 movement restrictions. Other existing inequalities in use were possibly exacerbated in the  
35 345 month after movement restrictions were enforced, with females being more likely to report a  
36 346 decrease in visits following movement restrictions.

37 347

38 348 The proportion of respondents who visited green space before and following movement  
39 349 restrictions decreased, from 93% to 53%. This was consistent with Natural England's  
40 350 findings from April 2020 where 49% of English adults reported green space visits in the  
41 351 previous two weeks.[31] Natural England conducted an online panel survey in April 2020  
42 352 (N=2,083), the survey covered only the English population, collecting information on the  
43 353 frequency of time in green and natural spaces in the 12 months, and then 2 weeks, prior to the  
44 354 survey.[32] The survey did not directly ask respondents about whether they felt their  
45 355 experiences within green space had changed following movement restrictions. A similar  
46 356 study focused on change in time spent visiting parks using the Google COVID-19  
47 357 Community Mobility Reports covering 620 counties across the United States(USA). They  
48 358 found a lower percentage decrease in park visits compared to our findings, reporting a 17-  
49 359 35% decrease in visits between 15<sup>th</sup> March-9<sup>th</sup> May 2020.[33] This difference may be  
50 360 explained by the focus on parks alone rather than different types of green space. However,  
51 361 additional research exploring the Google COVID-19 Community Mobility Reports found that

1  
2  
3 362 from 16<sup>th</sup> February-29<sup>th</sup> March 2020 park use decreased by 90% in Catalonia, 7% in Oslo,  
4 363 and 79% in New York County. In Stockholm, park use increased by 24% in the same  
5 364 timeframe.[34] This could be explained by Sweden having a less stringent approach to  
6 365 movement restrictions and instead relying on 'self-responsibility' to prevent the population  
7 366 having to restrict movement and stay at home.[35] The Swedish population may also be more  
8 367 culturally attuned to seeking time in nature to combat stress.

9 368

11 369 Females and older individuals were more likely to have reported decreased visits to green  
12 370 space following movement restrictions. These findings corroborate with existing data  
13 371 collected before movement restrictions.[9,13,14] Boyd *et al.* analysed the Natural England  
14 372 'Monitor of Engagement with the Natural Environment' survey (N=63,890) with a focus on  
15 373 infrequent use. They found that females and older adults in England were more likely to be  
16 374 infrequent visitors.[9] Cohen *et al.* explored physical activity levels in Los Angeles' parks  
17 375 (N=1,318). They reported that age and sex were predictors of park use, with <5% of park  
18 376 users over 60 years old, and males using parks more often than females (62% vs. 38%).[13]

19 377

21 378 Our findings suggested that existing patterns of gender inequality in use were sustained and  
22 379 potentially exacerbated due to fears arising from the COVID-19 pandemic. For example, an  
23 380 Ipsos MORI survey was conducted in April 2020, collecting data on gender differences in  
24 381 British attitudes towards COVID-19. They found that women were more likely to report  
25 382 following government rules to avoid leaving their home (78%) than men (68%) and felt more  
26 383 uncomfortable about returning to "normal"(N=1,000).[36,37]

27 384

29 385 Previous studies have found that females feel more vulnerable than males in green spaces,  
30 386 especially without company.[14,15,29,38–40] There are few quantitative studies focusing on  
31 387 sex and the importance of social interaction as a motivation behind green space use. We  
32 388 found that females were more likely to agree that they missed seeing/talking with others in  
33 389 green space than males. This could be explained by the nature of the movement restrictions at  
34 390 this time, particularly the inability to socially interact with individuals outside your household  
35 391 in green space.

36 392

38 393 Given older age is probably the most important risk factor for an adverse outcome from  
39 394 COVID-19,[41,42] it was not surprising that older individuals were less likely to report an  
40 395 increase in green space visits and to agree that they were doing more physical activity  
41 396 following movement restrictions. These findings corroborate with the majority of research  
42 397 exploring older age and green space use before the movement restrictions.[9,13,43] Older  
43 398 people in the UK have been found to be at particular risk of social isolation during social  
44 399 distancing, being less likely to use online communications and more likely to live alone than  
45 400 younger individuals.[19] Our findings also show that older people are less likely to have used  
46 401 green space during lockdown, further emphasising this point. The significant decrease in  
47 402 green space visits following movement restrictions for older respondents could be explained  
48 403 by the government advice for over 70s and those with an underlying health condition to  
49 404 shield, minimise interaction and stay at home, for around 12 weeks from 21<sup>st</sup> March  
50 405 2020.[44]

51 406

53 407 Lower social grade respondents reported little or no change in visitation to green space, with  
54 408 time spent visiting green space remaining low both before and after movement restrictions.  
55 409 This is supported by previous studies exploring the association between socio-economic  
56 410 position (SEP) and green space use.[9,15,43] One possible explanation is a lack of interest in  
57 411 visiting green space reported by lower SEP individuals.[9] Additionally, the social grade

1  
2  
3 412 variable was categorised by occupation, and it was likely that individuals categorised as  
4 413 lower social grade were working in manual or service occupations.[24] They may have  
5 414 continued at their usual workplace/working hours during the COVID-19 pandemic. Findings  
6 415 from the Office for National Statistics support this explanation, with 30.5% of employees in  
7 416 the bottom three income deciles (monthly earnings of up to £1,450) considered as key  
8 417 workers in March/April 2020, compared to 26.4% in the top three income deciles (monthly  
9 418 earnings of up to £3,250).[45] Similarly, existing international research on public space use  
10 419 during COVID-19 restrictions worldwide state that skilled workers in the knowledge  
11 420 economy have shifted easily into online work from home, and can therefore make more use  
12 421 of green spaces during the movement restrictions.[46]  
13 422

14 423 Younger BAME respondents had a higher probability of visiting green space following  
15 424 movement restrictions and reporting increased visits since movement restrictions, compared  
16 425 to white and older BAME respondents. A survey on park use and ethnic integration in  
17 426 Reading, UK (N=294) reported similar findings, with Black and Asian youths accounting for  
18 427 a higher proportion of parks users than white youths.[47] Further exploration is required to  
19 428 enable interpretation of these interaction results because of our small BAME sample.  
20 429

21 430 The results for dog owners suggest that the movement restrictions have had an overall  
22 431 negative impact on their experiences within green space. Although dog owners were more  
23 432 likely to have visited green space following the movement restrictions than those that did not  
24 433 own a dog, they were less likely to agree that they had increased physical activity and more  
25 434 likely to have decreased visitations following the restrictions. These results differ from  
26 435 research undertaken in Canada that reported findings that dog ownership was associated with  
27 436 more outdoor play and less indoor play in Canadian youth at the start of the pandemic.[48]  
28 437 However, the focus on youth rather than adults may explain this difference in findings.  
29 438 Instead, the difference found in visits after restrictions were enforced may be due to dog  
30 439 owners having to walk their dog/s in green spaces *despite* the pandemic restrictions. In  
31 440 comparison between our results and those of other studies, we are mindful of the difference  
32 441 between number of visits and time spent in green spaces as measures of 'use'. It would be  
33 442 entirely possible to increase one at the expense of the other and our data were not well suited  
34 443 to unpacking the relationship between them.  
35 444

## 36 445 **Strengths and limitations**

37 446

38 447 Our study has several strengths; to our knowledge, currently this is the only data covering  
39 448 UK population change in use and experiences within green space at the start of the movement  
40 449 restrictions from 23<sup>rd</sup> March 2020. This means that the data could provide timely information  
41 450 to local and national governments across the UK. It is important to understand the effects of  
42 451 the initial movement restrictions to generate policy recommendations for any future  
43 452 movement restrictions. The rapid collection of data, just over a month after the movement  
44 453 restrictions were introduced, reduces risk of recall bias. The sample is nationally  
45 454 representative of UK adults, with weightings calculated by YouGov and applied to all  
46 455 analyses, reducing risk of selection bias.[22]  
47 456

48 457 A further strength of our study is providing quantitative data on the importance of social  
49 458 interaction as a driver for using green space, which is under-reported in the literature. We  
50 459 analysed social grade at an individual level, which provides greater detail and accuracy of the  
51 460 respondent's SEP than at neighbourhood level.  
52 461



1  
2  
3 462 There are some caveats. The survey design was cross-sectional, and we are unable to  
4 463 demonstrate causality between change in green space use and experiences and the  
5 464 demographic data. Additionally, the data on use and experiences are self-reported and  
6 465 therefore subjective. Certain variable response categories had to be recategorised in order to  
7 466 analyse them. This is particularly evident in the ethnicity and age variables, where some  
8 467 distinctiveness across groups was lost. The variable best capturing change in behaviour  
9 468 measured time spent in green space, but this made it difficult to understand whether  
10 469 respondents traded off time and numbers of visits.  
11  
12 470

13  
14 471 We encourage future research to further investigate the interactions between ethnicity, age  
15 472 and social grade in relation to green space use to enable more substantial interpretation of the  
16 473 results and to explore whether the patterns are consistent over time and in different contexts.  
17 474 Moreover, further research is required to explore the reasons *why* many patterns and changes  
18 475 in use of green space since movement restrictions have emerged. It would also be interesting  
19 476 to explore the change in patterns of use before and following movement restrictions for those  
20 477 that did not visit before the movement restrictions but did visit green space following  
21 478 restrictions.  
22

## 23 479

### 24 480 **CONCLUSION**

25 481  
26 482 During the COVID-19 pandemic, our study provides novel evidence to suggest that green  
27 483 space use and experiences were affected during the first month of movement restrictions in  
28 484 the UK. Our findings suggested that inequalities in use were sustained, with lower social  
29 485 grade individuals less likely to visit green space than higher social grade individuals before  
30 486 and following movement restrictions. It is possible that these inequalities were exacerbated,  
31 487 as females and older individuals were the groups most likely to have decreased visits  
32 488 following movement restrictions. Although these findings reflect the UK population's  
33 489 experience during the movement restrictions, they could be compared with countries such as  
34 490 Norway, USA, and Spain where green space visits also decreased. We believe that these  
35 491 findings emphasise the need for green spaces to remain open in any future 'lockdowns' and  
36 492 for governments to actively encourage individuals to utilise these spaces to support their  
37 493 mental and physical health during subsequent waves of the pandemic. Further investigation  
38 494 is required to support these findings and how they may change through the stages of the  
39 495 COVID-19 pandemic and the relaxing, and potential re-introduction, of movement  
40 496 restrictions.  
41  
42  
43  
44 497

### 45 498 **COMPETING INTERESTS**

46 499 None declared.

### 47 500

### 48 501 **DATA SHARING STATEMENT**

49 502 We have made our research dataset publicly available (Datacite DOI:  
50 503 10.5525/gla.researchdata.1038 - embargoed until 31/10/2023).  
51 504

### 52 505

### 53 506 **CONTRIBUTORS**

54 506 HB, JRO and RM designed the study and survey; HB conducted data analysis which was  
55 507 reviewed by NN; HB wrote the first draft of the paper; all authors contributed to interpreting  
56 508 the results and revising the draft. The corresponding author attests that all listed authors meet  
57 509 authorship criteria and that no others meeting the criteria have been omitted.  
58 510

### 59 511

### 60 512 **FUNDING STATEMENT**

1  
2  
3 512 The authors (HB, JRO, NN & RM) are part of the Places and Health Programme at the  
4 513 MRC/CSO Social and Public Health Sciences Unit (SPHSU), University of Glasgow,  
5 514 supported by the Medical Research Council (MC\_UU\_12017/10) and the Chief Scientist  
6 515 Office (SPHSU10).  
7  
8

## 9 **References:**

- 10  
11 516 1 Barton J, Pretty J. What is the Best Dose of Nature and Green Exercise for Improving  
12 517 Mental Health? A Multi-Study Analysis. *Environ Sci Technol* 2010;**44**:3947–55.  
13 518 doi:10.1021/es903183r  
14  
15 519 2 Douglas O, Lennon M, Scott M. Green space benefits for health and well-being: A  
16 520 life-course approach for urban planning, design and management. *CITIES* 2017;**66**:53–  
17 521 62. doi:10.1016/j.cities.2017.03.011  
18 522 3 Twohig-Bennett C, Jones A. The health benefits of the great outdoors: A systematic  
19 523 review and meta-analysis of greenspace exposure and health outcomes. *Environ Res*  
20 524 2018;**166**:628–37. doi:10.1016/j.envres.2018.06.030  
21  
22 525 4 Maas J, Van Dillen SME, Verheij RA, *et al.* Social contacts as a possible mechanism  
23 526 behind the relation between green space and health. *Health Place* 2009;**15**:586–95.  
24 527 doi:10.1016/j.healthplace.2008.09.006  
25 528 5 Wells N, Evans G. NEARBY NATURE A Buffer of Life Stress Among Rural  
26 529 Children. *Environ Behav* 2003;**35**:311–30. doi:10.1177/0013916503251445  
27  
28 530 6 Frumkin H, Bratman GN, Breslow SJ, *et al.* Nature Contact and Human Health: A  
29 531 Research Agenda. *Environ Health Perspect* 2017;**125**. doi:10.1289/EHP1663  
30 532 7 Mitchell RJ, Richardson EA, Shortt NK, *et al.* Neighborhood Environments and  
31 533 Socioeconomic Inequalities in Mental Well-Being. *Am J Prev Med* 2015;**49**:80–4.  
32 534 doi:10.1016/j.amepre.2015.01.017  
33 535 8 Wilson V, Seddon B. Scotland’s People and Nature Survey 2017/18 – outdoor  
34 536 recreation and health modules. ( Scottish Natural Heritage Research Report No. 1062).  
35 537 Inverness: 2018.  
36  
37 538 9 Boyd F, White MP, Bell SL, *et al.* Who doesn’t visit natural environments for  
38 539 recreation and why: A population representative analysis of spatial, individual and  
39 540 temporal factors among adults in England. *Landsc Urban Plan* 2018;**175**:102–13.  
40 541 doi:10.1016/j.landurbplan.2018.03.016  
41 542 10 Bell SL, Phoenix C, Lovell R, *et al.* Green space, health and wellbeing: making space  
42 543 for individual agency. *Health Place* 2014;**30**:287–92.  
43 544 doi:10.1016/j.healthplace.2014.10.005  
44  
45 545 11 Lin BB, Fuller RA, Bush R, *et al.* Opportunity or Orientation ? Who Uses Urban Parks  
46 546 and Why. 2014;**9**:1–7. doi:10.1371/journal.pone.0087422  
47 547 12 Ward Thompson C, Aspinall P, Montarzino A. The Childhood Factor Adult Visits to  
48 548 Green Places and the Significance of Childhood Experience. *Environ Behav*  
49 549 2008;**40**:111–43. doi:10.1177/0013916507300119  
50  
51 550 13 Cohen DA, McKenzie TL, Sehgal A, *et al.* Contribution of Public Parks to Physical  
52 551 Activity. *Am J Public Health* 2007;**97**:509–14. doi:10.2105/AJPH.2005.072447  
53 552 14 Lee ACK, Maheswaran R. The health benefits of urban green spaces: A review of the  
54 553 evidence. *J Public Health (Bangkok)* 2011;**33**:212–22. doi:10.1093/pubmed/fdq068  
55 554 15 Morris J, O’Brien E, Ambrose-Oji B, *et al.* Access for all? Barriers to accessing  
56 555 woodlands and forests in Britain. *Local Environ Int J Justice Sustain* 2011;**16**:375–96.  
57 556 doi:10.1080/13549839.2011.576662  
58  
59 557 16 Wynants L, Van Calster B, Bonten MMJ, *et al.* Prediction models for diagnosis and  
60 558 prognosis of covid-19 infection: systematic review and critical appraisal . *BMJ*

- 2020;**369**. doi:10.1136/bmj.m1328
- 559  
560 17 Johnson B. Prime Minister’s statement on coronavirus (COVID-19): 23 March 2020.  
561 GOV.UK. 2020.[https://www.gov.uk/government/speeches/pm-address-to-the-nation-](https://www.gov.uk/government/speeches/pm-address-to-the-nation-on-coronavirus-23-march-2020)  
562 [on-coronavirus-23-march-2020](https://www.gov.uk/government/speeches/pm-address-to-the-nation-on-coronavirus-23-march-2020) (accessed 7 Jul 2020).
- 563 18 O’Connor RC, Wetherall K, Cleare S, *et al*. Mental health and wellbeing during the  
564 COVID-19 pandemic: longitudinal analyses of adults in the UK COVID-19 Mental  
565 Health & Wellbeing study. *Br J Psychiatry* 2020;:1–17. doi:10.1192/bjp.2020.212
- 566 19 Douglas M, Katikireddi SV, Taulbut M, *et al*. Mitigating the wider health effects of  
567 covid-19 pandemic response. *BMJ* 2020;**369**. doi:10.1136/bmj.m1557
- 568 20 YouGov. About YouGov Company. <https://yougov.co.uk/about/> (accessed 8 Jun  
569 2020).
- 570 21 YouGov and ESOMAR (World Association for Social Opinion and Market Research).  
571 ESOMAR 28: 28 Questions to help Online Research Buyers. The Netherlands: 2012.  
572 [http://cdn.yougov.com/cumulus\\_uploads/document/t3r5k565j5/ESOMAR\\_28.pdf](http://cdn.yougov.com/cumulus_uploads/document/t3r5k565j5/ESOMAR_28.pdf)  
573 (accessed 8 Jun 2020).
- 574 22 YouGov. Panel Methodology. <https://yougov.co.uk/about/panel-methodology/>  
575 (accessed 8 Jun 2020).
- 576 23 Cabinet Office. Staying at home and away from others (social distancing). London:  
577 2020. [https://www.gov.uk/government/publications/full-guidance-on-staying-at-home-](https://www.gov.uk/government/publications/full-guidance-on-staying-at-home-and-away-from-others)  
578 [and-away-from-others](https://www.gov.uk/government/publications/full-guidance-on-staying-at-home-and-away-from-others) (accessed 8 Oct 2020).
- 579 24 The Market Research Society (MRS). Definitions employed in Social Grading. MRS.  
580 [https://www.mrs.org.uk/pdf/Definitions employed in Social Grading. MRS.](https://www.mrs.org.uk/pdf/Definitions%20used%20in%20Social%20Grading%20based%20on%20OG7.pdf)  
581 <https://www.mrs.org.uk/pdf/Definitions used in Social Grading based on OG7.pdf>  
(accessed 2 Jul 2020).
- 582 25 R Core Team. R: A Language and Environment for Statistical Computing.  
583 2018.<https://www.r-project.org/>
- 584 26 Schlegel BE. Package brant. <https://benjaminschlegel.ch/en/r/brant/> (accessed 29 Oct  
585 2020).
- 586 27 Brant R. Assessing proportionality in the proportional odds model for ordinal logistic  
587 regression. *Biometrics* 1990;**46**:1171–8.
- 588 28 Burnett H. Change in green space use and experiences following UK restrictions on  
589 movement. GitHub. 2020.[https://github.com/hannahburnett/greenspace-covid\\_code](https://github.com/hannahburnett/greenspace-covid_code)  
590 (accessed 21 Jul 2020).
- 591 29 Richardson EA, Mitchell R. Gender differences in relationships between urban green  
592 space and health in the United Kingdom. *Soc Sci Med* 2010;**71**:568–75.  
593 doi:10.1016/J.SOCSCIMED.2010.04.015
- 594 30 Astell-Burt T, Mitchell R, Hartig T, *et al*. The association between green space and  
595 mental health varies across the lifecourse. A longitudinal study. *J Epidemiol*  
596 *Community Heal* 2014;**68**:578–83. doi:10.1136/jech-2013-203767
- 597 31 Natural England. The People and Nature Survey for England: Monthly interim  
598 indicators for April 2020 (Experimental Statistics) . Nat. Engl.  
599 2020.[https://www.gov.uk/government/publications/the-people-and-nature-survey-for-](https://www.gov.uk/government/publications/the-people-and-nature-survey-for-england-monthly-interim-indicators-for-april-2020-experimental-statistics/the-people-and-nature-survey-for-england-monthly-interim-indicators-for-april-2020-experimental-statistics)  
600 [england-monthly-interim-indicators-for-april-2020-experimental-statistics/the-people-](https://www.gov.uk/government/publications/the-people-and-nature-survey-for-england-monthly-interim-indicators-for-april-2020-experimental-statistics/the-people-and-nature-survey-for-england-monthly-interim-indicators-for-april-2020-experimental-statistics)  
601 [and-nature-survey-for-england-monthly-interim-indicators-for-april-2020-](https://www.gov.uk/government/publications/the-people-and-nature-survey-for-england-monthly-interim-indicators-for-april-2020-experimental-statistics/the-people-and-nature-survey-for-england-monthly-interim-indicators-for-april-2020-experimental-statistics)  
602 [experimental-statistics](https://www.gov.uk/government/publications/the-people-and-nature-survey-for-england-monthly-interim-indicators-for-april-2020-experimental-statistics/the-people-and-nature-survey-for-england-monthly-interim-indicators-for-april-2020-experimental-statistics) (accessed 25 Jun 2020).
- 603 32 Natural England. The People and Nature Survey For England. 2020.  
604 <http://publications.naturalengland.org.uk/publication/6382837173583872>
- 605 33 Curtis DS, Rigolon A, Schmalz DL, *et al*. Getting out while staying in: Park use  
606 decreased during the COVID-19 pandemic, especially where park availability was  
607 low. *Cent Open Sci OSF Prepr* Published Online First: 2020.  
608 doi:10.31235/osf.io/9xzgf

- 1  
2  
3 609 34 Barton D, Haase D, Mascarenhas A, *et al.* Enabling Access to Greenspace During the  
4 610 Covid-19 Pandemic-Perspectives from Five Cities. *Nat. Cities*.  
5 611 2020.[https://www.thenatureofcities.com/2020/05/04/enabling-access-to-greenspace-](https://www.thenatureofcities.com/2020/05/04/enabling-access-to-greenspace-during-the-covid-19-pandemic-perspectives-from-five-cities/)  
6 612 [during-the-covid-19-pandemic-perspectives-from-five-cities/](https://www.thenatureofcities.com/2020/05/04/enabling-access-to-greenspace-during-the-covid-19-pandemic-perspectives-from-five-cities/) (accessed 23 Oct 2020).  
7 613 35 Savage M. Lockdown, what lockdown? Sweden’s unusual response to coronavirus.  
8 614 BBC News. 2020.  
9 615 36 Ipsos MORI. Gender differences in attitudes towards Coronavirus. 2020.  
10 616 [https://www.ipsos.com/sites/default/files/ct/news/documents/2020-](https://www.ipsos.com/sites/default/files/ct/news/documents/2020-05/fawcett_society_presentation.pdf)  
11 617 [05/fawcett\\_society\\_presentation.pdf](https://www.ipsos.com/sites/default/files/ct/news/documents/2020-05/fawcett_society_presentation.pdf) (accessed 10 Jul 2020).  
12 618 37 Ipsos MORI, The Fawcett Society. 6 in 10 women finding it harder to stay positive  
13 619 day-to-day due to Coronavirus: Women more likely to bearing the emotional and  
14 620 impact of the pandemic . Fawcett Soc.  
15 621 2020.[https://www.fawcettsociety.org.uk/Handlers/Download.ashx?IDMF=f173fde3-](https://www.fawcettsociety.org.uk/Handlers/Download.ashx?IDMF=f173fde3-4edb-4c51-8453-7244e867ed90)  
16 622 [4edb-4c51-8453-7244e867ed90](https://www.fawcettsociety.org.uk/Handlers/Download.ashx?IDMF=f173fde3-4edb-4c51-8453-7244e867ed90) (accessed 10 Jul 2020).  
17 623 38 Thompson CW, Aspinall P, Bell S, *et al.* “It Gets You Away From Everyday Life”:  
18 624 Local Woodlands and Community Use—What Makes a Difference? *Landsc Res*  
19 625 2007;**30**:109–46. doi:10.1080/0142639042000324794  
20 626 39 Burgess J. Focusing on Fear: The Use of Focus Groups in a Project for the Community  
21 627 Forest Unit, Countryside Commission. 1996.  
22 628 40 O’Brien L, Morris J. Well-being for all? The social distribution of benefits gained  
23 629 from woodlands and forests in Britain. *Local Environ Int J Justice Sustain*  
24 630 2014;**19**:356–83. doi:10.1080/13549839.2013.790354  
25 631 41 Public Health England. Disparities in the risk and outcomes from COVID-19. London:  
26 632 2020. [www.facebook.com/PublicHealthEngland](http://www.facebook.com/PublicHealthEngland) (accessed 26 Jul 2020).  
27 633 42 Office for National Statistics. Deaths registered weekly in England and Wales,  
28 634 provisional: week ending 10 July 2020. ONS.  
29 635 2020.[https://www.ons.gov.uk/peoplepopulationandcommunity/birthsdeathsandmarriag-](https://www.ons.gov.uk/peoplepopulationandcommunity/birthsdeathsandmarriages/deaths/bulletins/deathsregisteredweeklyinenglandandwalesprovisional/latest#deaths-registered-by-age-group)  
30 636 [es/deaths/bulletins/deathsregisteredweeklyinenglandandwalesprovisional/latest#deaths](https://www.ons.gov.uk/peoplepopulationandcommunity/birthsdeathsandmarriages/deaths/bulletins/deathsregisteredweeklyinenglandandwalesprovisional/latest#deaths-registered-by-age-group)  
31 637 [-registered-by-age-group](https://www.ons.gov.uk/peoplepopulationandcommunity/birthsdeathsandmarriages/deaths/bulletins/deathsregisteredweeklyinenglandandwalesprovisional/latest#deaths-registered-by-age-group) (accessed 26 Jul 2020).  
32 638 43 TNS. Scotland’s People and Nature Survey 2013/14. (Scottish Natural Heritage  
33 639 Commissioned Report No. 679). 2014.  
34 640 44 Johnson B. Prime Minister’s statement on coronavirus (COVID-19): 16 March 2020.  
35 641 GOV.UK. 2020.[https://www.gov.uk/government/speeches/pm-statement-on-](https://www.gov.uk/government/speeches/pm-statement-on-coronavirus-16-march-2020)  
36 642 [coronavirus-16-march-2020](https://www.gov.uk/government/speeches/pm-statement-on-coronavirus-16-march-2020) (accessed 26 Jun 2020).  
37 643 45 Office for National Statistics. Coronavirus and how people spent their time under  
38 644 lockdown. ONS.  
39 645 2020.[https://www.ons.gov.uk/economy/nationalaccounts/satelliteaccounts/bulletins/co-](https://www.ons.gov.uk/economy/nationalaccounts/satelliteaccounts/bulletins/coronavirusandhowpeoplespenttheirtimeunderrestrictions/28marchto26april2020)  
40 646 [ronavirusandhowpeoplespenttheirtimeunderrestrictions/28marchto26april2020](https://www.ons.gov.uk/economy/nationalaccounts/satelliteaccounts/bulletins/coronavirusandhowpeoplespenttheirtimeunderrestrictions/28marchto26april2020)  
41 647 (accessed 16 Jul 2020).  
42 648 46 Honey-Rosés J, Anguelovski I, Chireh VK, *et al.* The impact of COVID-19 on public  
43 649 space: an early review of the emerging questions – design, perceptions and inequities.  
44 650 *Cities Heal* 2020;**1**–17. doi:10.1080/23748834.2020.1780074  
45 651 47 Ravenscroft N, Markwell S. Ethnicity and the integration and exclusion of young  
46 652 people through urban park and recreation provision. *Manag Leis* 2000;**5**:135–50.  
47 653 doi:10.1080/13606710050084838  
48 654 48 Moore SA, Faulkner G, Rhodes RE, *et al.* Impact of the COVID-19 virus outbreak on  
49 655 movement and play behaviours of Canadian children and youth: a national survey. *Int*  
50 656 *J Behav Nutr Phys Act* 2020;**17**. doi:10.1186/s12966-020-00987-8  
51 657  
52 658

1  
2  
3 **659 Figure legends:**  
4

5 **660**

6 **661** Figure 1: Interaction between age and ethnicity for change in time spent visiting green space

7 **662** since movement restrictions were enforced.  
8

9 **663**  
10  
11  
12  
13  
14  
15  
16  
17  
18  
19  
20  
21  
22  
23  
24  
25  
26  
27  
28  
29  
30  
31  
32  
33  
34  
35  
36  
37  
38  
39  
40  
41  
42  
43  
44  
45  
46  
47  
48  
49  
50  
51  
52  
53  
54  
55  
56  
57  
58  
59  
60

1  
2  
3  
4  
5  
6  
7  
8  
9  
10  
11  
12  
13  
14  
15  
16  
17  
18  
19  
20  
21  
22  
23  
24  
25  
26  
27  
28  
29  
30  
31  
32  
33  
34  
35  
36  
37  
38  
39  
40  
41  
42  
43  
44  
45  
46  
47  
48  
49  
50  
51  
52  
53  
54  
55  
56  
57  
58  
59  
60

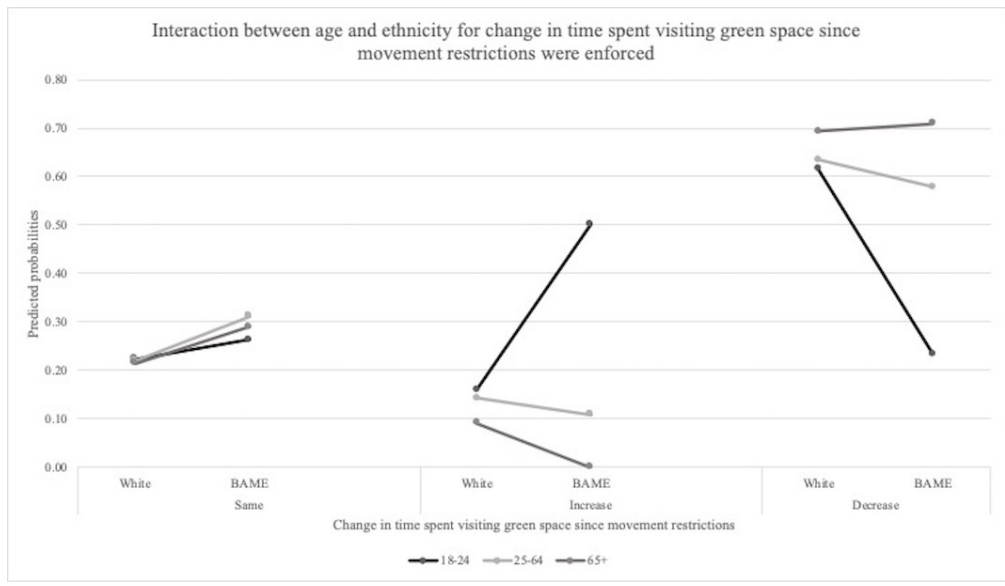

Figure 1: Interaction between age and ethnicity for change in time spent visiting green space since movement restrictions were enforced.

90x51mm (300 x 300 DPI)

## Supplementary Materials

**Supplementary Table 1: Category mergers of the response categories (ethnicity, age, social grade, sex and dog ownership).**

|                      | <b>Original categories (Unweighted N)</b> | <b>New categories (Unweighted N)</b> |
|----------------------|-------------------------------------------|--------------------------------------|
| <b>Ethnicity</b>     | White British (1659)                      | White (1745)                         |
|                      | Any other white background (86)           |                                      |
|                      | White and Black Caribbean (6)             | BAME (87)                            |
|                      | White and Black African (4)               |                                      |
|                      | White and Asian (8)                       |                                      |
|                      | Any other mixed background (8)            |                                      |
|                      | Indian (17)                               |                                      |
|                      | Pakistani (5)                             |                                      |
|                      | Bangladeshi (4)                           |                                      |
|                      | Any other Asian background (3)            |                                      |
|                      | Black Caribbean (4)                       |                                      |
|                      | Black African (3)                         |                                      |
|                      | Any other black background (3)            |                                      |
|                      | Chinese (10)                              |                                      |
|                      | Other ethnic group (12)                   |                                      |
|                      | Prefer not to say (19)                    | Missing (420)                        |
|                      | Not answered (401)                        |                                      |
|                      |                                           |                                      |
|                      | <b>Age</b>                                | 18-24 (165)                          |
| 25-34 (316)          |                                           | 25-64 (1497)                         |
| 35-44 (396)          |                                           |                                      |
| 45-54 (398)          |                                           |                                      |
| 55-64 (387)          |                                           |                                      |
| 65+ (590)            |                                           | 65+ (590)                            |
|                      |                                           |                                      |
| <b>Social grade</b>  | ABC1 (1419)                               |                                      |
|                      | C2DE (833)                                |                                      |
| <b>Sex</b>           | Male (1018)                               |                                      |
|                      | Female (1234)                             |                                      |
| <b>Dog ownership</b> | Yes (616)                                 |                                      |
|                      | No (1636)                                 |                                      |

**Supplementary Table 2: Change in green space visit frequency since restrictions by individual demographic and socio-economic characteristics (unweighted).**

|                                | Visited green space in the year before restrictions |                  | Visited green space after restrictions (only those who visited green space before restrictions) |                   | Green space visitation change since lockdown |                     |                          |
|--------------------------------|-----------------------------------------------------|------------------|-------------------------------------------------------------------------------------------------|-------------------|----------------------------------------------|---------------------|--------------------------|
|                                | Yes (N=2045, 93.5%)                                 | No (N=142, 6.4%) | Yes (N=1099, 53.8%)                                                                             | No (N=943, 46.2%) | Decreased (N=1392, 63.3%)                    | Same (N=473, 21.5%) | Increased (N=333, 15.2%) |
|                                | % (N)                                               | % (N)            | % (N)                                                                                           | % (N)             | % (N)                                        | % (N)               | % (N)                    |
| <b>Sex</b>                     |                                                     |                  |                                                                                                 |                   |                                              |                     |                          |
| <b>Male (ref)</b>              | 92.6% (919)                                         | 7.4% (73)        | 55.2% (507)                                                                                     | 44.8% (411)       | 61.6% (609)                                  | 23.5% (232)         | 15% (148)                |
| <b>Female</b>                  | 94.2% (1126)                                        | 5.8% (69)        | 52.7% (592)                                                                                     | 47.3% (532)       | 64.8% (783)                                  | 19.9% (241)         | 15.3% (185)              |
| <b>Social grade</b>            |                                                     |                  |                                                                                                 |                   |                                              |                     |                          |
| <b>ABC1 (ref)</b>              | 95.8% (1328)                                        | 4.2% (58)        | 56.7% (753)                                                                                     | 43.3% (574)       | 62.9% (871)                                  | 18.8% (260)         | 18.3% (254)              |
| <b>C2DE</b>                    | 89.5% (717)                                         | 10.5% (84)       | 48.4% (346)                                                                                     | 51.6% (369)       | 64.1% (521)                                  | 26.2% (213)         | 9.7% (79)                |
| <b>Age</b>                     |                                                     |                  |                                                                                                 |                   |                                              |                     |                          |
| <b>18-24</b>                   | 93.3% (139)                                         | 6.7% (10)        | 56.9% (78)                                                                                      | 43.1% (59)        | 58.4% (87)                                   | 20.8% (31)          | 20.8% (31)               |
| <b>25-64 (ref)</b>             | 93.6% (1364)                                        | 6.4% (94)        | 56.1% (765)                                                                                     | 43.9% (598)       | 61.8% (906)                                  | 21.5% (315)         | 16.7% (245)              |
| <b>65+</b>                     | 93.4% (542)                                         | 6.6% (38)        | 47.2% (256)                                                                                     | 52.8% (286)       | 68.4% (399)                                  | 21.8% (127)         | 9.8% (57)                |
| <b>Ethnicity</b>               |                                                     |                  |                                                                                                 |                   |                                              |                     |                          |
| <b>White (ref)</b>             | 93.6% (1592)                                        | 6.4% (109)       | 52.1% (828)                                                                                     | 47.9% (762)       | 64.1% (1098)                                 | 22.5% (385)         | 13.4% (229)              |
| <b>BAME</b>                    | 84.1% (69)                                          | 15.9% (13)       | 47.8% (33)                                                                                      | 52.2% (36)        | 57% (45)                                     | 30.4% (24)          | 12.7% (10)               |
| <b>Dog ownership</b>           |                                                     |                  |                                                                                                 |                   |                                              |                     |                          |
| <b>Don't own a dog/s (ref)</b> | 93.1% (1476)                                        | 6.9% (109)       | 51.4% (757)                                                                                     | 48.6% (717)       | 64.4% (1027)                                 | 19.5% (311)         | 16.1% (256)              |
| <b>Own a dog/s</b>             | 94.5% (569)                                         | 5.5% (33)        | 60.2% (342)                                                                                     | 39.8% (226)       | 60.4% (365)                                  | 26.8% (162)         | 12.7% (77)               |

Don't know/ can't recall responses were all excluded from analysis.



**Supplementary Table 3: Change in green space experience since restrictions by individual demographic and socio-economic characteristics (unweighted).**

|                                | Using green spaces benefits my mental health more now |                        |                        | Miss social interaction in green spaces now |                        |                         | Do more physical activity in green spaces now |                        |                         |
|--------------------------------|-------------------------------------------------------|------------------------|------------------------|---------------------------------------------|------------------------|-------------------------|-----------------------------------------------|------------------------|-------------------------|
|                                | Agree (N=721, 65.8%)                                  | Neither (N=272, 24.8%) | Disagree (N=102, 9.3%) | Agree (N=590, 54.1%)                        | Neither (N=288, 26.4%) | Disagree (N=213, 19.5%) | Agree (N=322, 29.5%)                          | Neither (N=337, 30.9%) | Disagree (N=431, 39.5%) |
|                                | % (N)                                                 |                        |                        | % (N)                                       |                        |                         | % (N)                                         |                        |                         |
| <i>Sex</i>                     |                                                       |                        |                        |                                             |                        |                         |                                               |                        |                         |
| <b>Male (ref)</b>              | 59.6% (300)                                           | 30.8% (155)            | 9.5% (48)              | 45.8% (231)                                 | 30% (151)              | 24.2% (122)             | 27.4% (137)                                   | 35.4% (177)            | 37.2% (186)             |
| <b>Female</b>                  | 71.1% (421)                                           | 19.8% (117)            | 9.1% (54)              | 61.2% (359)                                 | 23.3% (137)            | 15.5% (91)              | 31.4% (185)                                   | 27.1% (160)            | 41.5% (245)             |
| <i>Social grade</i>            |                                                       |                        |                        |                                             |                        |                         |                                               |                        |                         |
| <b>ABC1 (ref)</b>              | 68% (511)                                             | 22.9% (172)            | 9.1% (68)              | 54.9% (412)                                 | 25.3% (190)            | 19.7% (148)             | 31.6% (236)                                   | 28.9% (216)            | 39.6% (296)             |
| <b>C2DE</b>                    | 61% (210)                                             | 29.1% (100)            | 9.9% (34)              | 52.2% (178)                                 | 28.7% (98)             | 19.1% (65)              | 25.1% (86)                                    | 35.4% (121)            | 39.5% (135)             |
| <i>Age</i>                     |                                                       |                        |                        |                                             |                        |                         |                                               |                        |                         |
| <b>18-24</b>                   | 67.5% (52)                                            | 19.5% (15)             | 13% (10)               | 64.9% (50)                                  | 22.1% (17)             | 13% (10)                | 48.7% (38)                                    | 16.7% (13)             | 34.6% (27)              |
| <b>25-64 (ref)</b>             | 69% (526)                                             | 21% (160)              | 10% (76)               | 53.7% (407)                                 | 25.9% (196)            | 20.4% (155)             | 30.8% (233)                                   | 30.1% (228)            | 39.1% (296)             |
| <b>65+</b>                     | 55.9% (143)                                           | 37.9% (97)             | 6.2% (16)              | 52% (133)                                   | 29.3% (75)             | 18.8% (48)              | 20% (51)                                      | 37.6% (96)             | 42.4% (108)             |
| <i>Ethnicity</i>               |                                                       |                        |                        |                                             |                        |                         |                                               |                        |                         |
| <b>White (ref)</b>             | 62.8% (518)                                           | 27.3% (225)            | 9.9% (82)              | 51.6% (423)                                 | 28% (230)              | 20.4% (167)             | 26.5% (218)                                   | 32.3% (266)            | 41.2% (339)             |
| <b>BAME</b>                    | 75% (24)                                              | 21.9% (7)              | 3.1% (1)               | 51.5% (17)                                  | 30.3% (10)             | 18.2% (6)               | 38.7% (12)                                    | 38.7% (12)             | 22.6% (7)               |
| <i>Dog ownership</i>           |                                                       |                        |                        |                                             |                        |                         |                                               |                        |                         |
| <b>Don't own a dog/s (ref)</b> | 68.2% (514)                                           | 23.9% (180)            | 8% (60)                | 52.5% (395)                                 | 27.1% (204)            | 20.5% (154)             | 34.5% (259)                                   | 28.7% (215)            | 36.8% (276)             |
| <b>Own a dog/s</b>             | 60.7% (207)                                           | 27% (92)               | 12.3% (42)             | 57.7% (195)                                 | 24.9% (84)             | 17.5% (59)              | 18.5% (63)                                    | 35.9% (122)            | 45.6% (155)             |

Don't know/ can't recall responses were all excluded from analysis.

**Supplementary Table 4: Significant interactions as predicted probabilities for visiting green space before restrictions on movement (ethnicity and social grade) and after the restrictions on movement were enforced (ethnicity and age).**

|              | Before restrictions on movement: |                           |              | After restrictions on movement: |       |      |              |
|--------------|----------------------------------|---------------------------|--------------|---------------------------------|-------|------|--------------|
|              | ABC1 (Higher social grade)       | C2DE (Lower social grade) | p-value      | 18-24                           | 25-64 | 65+  | p-value      |
| <b>White</b> | 0.96                             | 0.89                      | <b>0.007</b> | 0.42                            | 0.53  | 0.48 | <b>0.005</b> |
| <b>BAME</b>  | 0.82                             | 0.88                      |              | 0.82                            | 0.49  | 0.32 |              |

For peer review only

1  
2  
3  
4  
5  
6  
7  
8  
9  
10  
11  
12  
13  
14  
15  
16  
17  
18  
19  
20  
21  
22  
23  
24  
25  
26  
27  
28  
29  
30  
31  
32  
33  
34  
35  
36  
37  
38  
39  
40  
41  
42  
43  
44  
45  
46

**Supplementary Table 5: Significant interactions as predicted probabilities for change in green space visits following restrictions on movement (ethnicity and age) and the three experience outcomes (social grade and age).**

| Change in green space visits |          | 18-24 | 25-64 | 65+  | p-value      |
|------------------------------|----------|-------|-------|------|--------------|
| White                        | Increase | 0.16  | 0.14  | 0.09 | <b>0.015</b> |
|                              | Neither  | 0.22  | 0.22  | 0.22 |              |
|                              | Decrease | 0.62  | 0.64  | 0.69 |              |
| BAME                         | Increase | 0.50  | 0.11  | 0.00 |              |
|                              | Neither  | 0.26  | 0.31  | 0.29 |              |
|                              | Decrease | 0.23  | 0.58  | 0.71 |              |
| <b>Mental Health</b>         |          |       |       |      |              |
| ABC1                         | Agree    | 0.79  | 0.70  | 0.56 | <b>0.023</b> |
|                              | Neither  | 0.10  | 0.20  | 0.38 |              |
|                              | Disagree | 0.11  | 0.10  | 0.06 |              |
| C2DE                         | Agree    | 0.26  | 0.64  | 0.53 |              |
|                              | Neither  | 0.33  | 0.27  | 0.41 |              |
|                              | Disagree | 0.41  | 0.10  | 0.06 |              |
| <b>Social Interaction</b>    |          |       |       |      |              |
| ABC1                         | Agree    | 0.70  | 0.54  | 0.49 | <b>0.008</b> |
|                              | Neither  | 0.08  | 0.27  | 0.28 |              |
|                              | Disagree | 0.22  | 0.19  | 0.22 |              |
| C2DE                         | Agree    | 0.45  | 0.45  | 0.55 |              |
|                              | Neither  | 0.43  | 0.29  | 0.32 |              |
|                              | Disagree | 0.13  | 0.26  | 0.13 |              |
| <b>Physical Activity</b>     |          |       |       |      |              |

|             |                 |      |      |      |              |
|-------------|-----------------|------|------|------|--------------|
| <b>ABC1</b> | <b>Agree</b>    | 0.41 | 0.31 | 0.18 | <b>0.047</b> |
|             | <b>Neither</b>  | 0.29 | 0.27 | 0.43 |              |
|             | <b>Disagree</b> | 0.30 | 0.42 | 0.39 |              |
|             |                 |      |      |      |              |
| <b>C2DE</b> | <b>Agree</b>    | 0.45 | 0.25 | 0.16 |              |
|             | <b>Neither</b>  | 0.18 | 0.39 | 0.33 |              |
|             | <b>Disagree</b> | 0.36 | 0.36 | 0.51 |              |

For peer review only

STROBE Statement—Checklist of items that should be included in reports of *cross-sectional studies*

|                              | Item No | Recommendation                                                                                                                                                                                    | Page No                  |
|------------------------------|---------|---------------------------------------------------------------------------------------------------------------------------------------------------------------------------------------------------|--------------------------|
| <b>Title and abstract</b>    | 1       | (a) Indicate the study's design with a commonly used term in the title or the abstract                                                                                                            | P1                       |
|                              |         | (b) Provide in the abstract an informative and balanced summary of what was done and what was found                                                                                               | P2                       |
| <b>Introduction</b>          |         |                                                                                                                                                                                                   |                          |
| Background/rationale         | 2       | Explain the scientific background and rationale for the investigation being reported                                                                                                              | P3/4                     |
| Objectives                   | 3       | State specific objectives, including any prespecified hypotheses                                                                                                                                  | P3/4                     |
| <b>Methods</b>               |         |                                                                                                                                                                                                   |                          |
| Study design                 | 4       | Present key elements of study design early in the paper                                                                                                                                           | P5/6                     |
| Setting                      | 5       | Describe the setting, locations, and relevant dates, including periods of recruitment, exposure, follow-up, and data collection                                                                   | P5/6                     |
| Participants                 | 6       | (a) Give the eligibility criteria, and the sources and methods of selection of participants                                                                                                       | P5/6                     |
| Variables                    | 7       | Clearly define all outcomes, exposures, predictors, potential confounders, and effect modifiers. Give diagnostic criteria, if applicable                                                          | P5-7                     |
| Data sources/<br>measurement | 8*      | For each variable of interest, give sources of data and details of methods of assessment (measurement). Describe comparability of assessment methods if there is more than one group              | P4/5                     |
| Bias                         | 9       | Describe any efforts to address potential sources of bias                                                                                                                                         | P4, 7                    |
| Study size                   | 10      | Explain how the study size was arrived at                                                                                                                                                         | P4/5                     |
| Quantitative variables       | 11      | Explain how quantitative variables were handled in the analyses. If applicable, describe which groupings were chosen and why                                                                      | P6-8                     |
| Statistical methods          | 12      | (a) Describe all statistical methods, including those used to control for confounding                                                                                                             | P7/8                     |
|                              |         | (b) Describe any methods used to examine subgroups and interactions                                                                                                                               | P8                       |
|                              |         | (c) Explain how missing data were addressed                                                                                                                                                       | P4-6                     |
|                              |         | (d) If applicable, describe analytical methods taking account of sampling strategy                                                                                                                | P6-8                     |
|                              |         | (e) Describe any sensitivity analyses                                                                                                                                                             | -                        |
| <b>Results</b>               |         |                                                                                                                                                                                                   |                          |
| Participants                 | 13*     | (a) Report numbers of individuals at each stage of study—eg numbers potentially eligible, examined for eligibility, confirmed eligible, included in the study, completing follow-up, and analysed | Supplementary Tables 1-3 |
|                              |         | (b) Give reasons for non-participation at each stage                                                                                                                                              | -                        |
|                              |         | (c) Consider use of a flow diagram                                                                                                                                                                | -                        |

|                                                                |                          |     |                                                                                                                                                                                                                                                                                                                                                                                                               |                                                                |
|----------------------------------------------------------------|--------------------------|-----|---------------------------------------------------------------------------------------------------------------------------------------------------------------------------------------------------------------------------------------------------------------------------------------------------------------------------------------------------------------------------------------------------------------|----------------------------------------------------------------|
| 1<br>2<br>3<br>4<br>5<br>6<br>7<br>8<br>9                      | Descriptive data         | 14* | (a) Give characteristics of study participants (eg demographic, clinical, social) and information on exposures and potential confounders<br>(b) Indicate number of participants with missing data for each variable of interest                                                                                                                                                                               | P4-6, Supplementary Table 1<br>Table 1 + Supplementary Table 1 |
| 10<br>11<br>12                                                 | Outcome data             | 15* | Report numbers of outcome events or summary measures                                                                                                                                                                                                                                                                                                                                                          | Tables 2-4+<br>Supplementary Tables 2-5                        |
| 13<br>14<br>15<br>16<br>17<br>18<br>19<br>20<br>21<br>22<br>23 | Main results             | 16  | (a) Give unadjusted estimates and, if applicable, confounder-adjusted estimates and their precision (eg, 95% confidence interval). Make clear which confounders were adjusted for and why they were included<br>(b) Report category boundaries when continuous variables were categorized<br>(c) If relevant, consider translating estimates of relative risk into absolute risk for a meaningful time period | P8-14<br>-<br>-                                                |
| 24<br>25                                                       | Other analyses           | 17  | Report other analyses done—eg analyses of subgroups and interactions, and sensitivity analyses                                                                                                                                                                                                                                                                                                                | P9/10                                                          |
| 26                                                             | <b>Discussion</b>        |     |                                                                                                                                                                                                                                                                                                                                                                                                               |                                                                |
| 27<br>28                                                       | Key results              | 18  | Summarise key results with reference to study objectives                                                                                                                                                                                                                                                                                                                                                      | P14/15                                                         |
| 29<br>30<br>31<br>32                                           | Limitations              | 19  | Discuss limitations of the study, taking into account sources of potential bias or imprecision. Discuss both direction and magnitude of any potential bias                                                                                                                                                                                                                                                    | P17                                                            |
| 33<br>34<br>35<br>36                                           | Interpretation           | 20  | Give a cautious overall interpretation of results considering objectives, limitations, multiplicity of analyses, results from similar studies, and other relevant evidence                                                                                                                                                                                                                                    | P14-17                                                         |
| 37<br>38                                                       | Generalisability         | 21  | Discuss the generalisability (external validity) of the study results                                                                                                                                                                                                                                                                                                                                         | P14, 17, 18                                                    |
| 39                                                             | <b>Other information</b> |     |                                                                                                                                                                                                                                                                                                                                                                                                               |                                                                |
| 40<br>41<br>42<br>43<br>44                                     | Funding                  | 22  | Give the source of funding and the role of the funders for the present study and, if applicable, for the original study on which the present article is based                                                                                                                                                                                                                                                 | P18                                                            |

\*Give information separately for exposed and unexposed groups.

**Note:** An Explanation and Elaboration article discusses each checklist item and gives methodological background and published examples of transparent reporting. The STROBE checklist is best used in conjunction with this article (freely available on the Web sites of PLoS Medicine at <http://www.plosmedicine.org/>, Annals of Internal Medicine at <http://www.annals.org/>, and Epidemiology at <http://www.epidem.com/>). Information on the STROBE Initiative is available at [www.strobe-statement.org](http://www.strobe-statement.org).

# BMJ Open

**Change in time spent visiting and experiences of green space following restrictions on movement during the COVID-19 pandemic: A nationally representative cross-sectional study of UK adults.**

|                                 |                                                                                                                                                                                                                                                                                                                                                                          |
|---------------------------------|--------------------------------------------------------------------------------------------------------------------------------------------------------------------------------------------------------------------------------------------------------------------------------------------------------------------------------------------------------------------------|
| Journal:                        | <i>BMJ Open</i>                                                                                                                                                                                                                                                                                                                                                          |
| Manuscript ID                   | bmjopen-2020-044067.R2                                                                                                                                                                                                                                                                                                                                                   |
| Article Type:                   | Original research                                                                                                                                                                                                                                                                                                                                                        |
| Date Submitted by the Author:   | 20-Jan-2021                                                                                                                                                                                                                                                                                                                                                              |
| Complete List of Authors:       | Burnett, Hannah; University of Glasgow, MRC/CSO Social and Public Health Sciences Unit<br>Olsen, Jonathan; University of Glasgow, MRC/CSO Social and Public Health Sciences Unit<br>Nicholls, Natalie; University of Glasgow, MRC/CSO Social and Public Health Sciences Unit<br>Mitchell, Richard; University of Glasgow, MRC/CSO Social and Public Health Sciences Unit |
| <b>Primary Subject Heading</b>: | Public health                                                                                                                                                                                                                                                                                                                                                            |
| Secondary Subject Heading:      | Mental health                                                                                                                                                                                                                                                                                                                                                            |
| Keywords:                       | MENTAL HEALTH, COVID-19, PUBLIC HEALTH                                                                                                                                                                                                                                                                                                                                   |
|                                 |                                                                                                                                                                                                                                                                                                                                                                          |

SCHOLARONE™  
Manuscripts

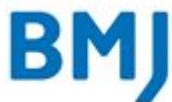

I, the Submitting Author has the right to grant and does grant on behalf of all authors of the Work (as defined in the below author licence), an exclusive licence and/or a non-exclusive licence for contributions from authors who are: i) UK Crown employees; ii) where BMJ has agreed a CC-BY licence shall apply, and/or iii) in accordance with the terms applicable for US Federal Government officers or employees acting as part of their official duties; on a worldwide, perpetual, irrevocable, royalty-free basis to BMJ Publishing Group Ltd ("BMJ") its licensees and where the relevant Journal is co-owned by BMJ to the co-owners of the Journal, to publish the Work in this journal and any other BMJ products and to exploit all rights, as set out in our [licence](#).

The Submitting Author accepts and understands that any supply made under these terms is made by BMJ to the Submitting Author unless you are acting as an employee on behalf of your employer or a postgraduate student of an affiliated institution which is paying any applicable article publishing charge ("APC") for Open Access articles. Where the Submitting Author wishes to make the Work available on an Open Access basis (and intends to pay the relevant APC), the terms of reuse of such Open Access shall be governed by a Creative Commons licence – details of these licences and which [Creative Commons](#) licence will apply to this Work are set out in our licence referred to above.

Other than as permitted in any relevant BMJ Author's Self Archiving Policies, I confirm this Work has not been accepted for publication elsewhere, is not being considered for publication elsewhere and does not duplicate material already published. I confirm all authors consent to publication of this Work and authorise the granting of this licence.



1  
2  
3  
4  
5  
6  
7  
8  
9  
10  
11  
12  
13  
14  
15  
16  
17  
18  
19  
20  
21  
22  
23  
24  
25  
26  
27  
28  
29  
30  
31  
32  
33  
34  
35  
36  
37  
38  
39  
40  
41  
42  
43  
44  
45  
46  
47  
48  
49  
50  
51  
52  
53  
54  
55  
56  
57  
58  
59  
60

1 **Change in time spent visiting and experiences of green space following**  
2 **restrictions on movement during the COVID-19 pandemic: A nationally**  
3 **representative cross-sectional study of UK adults.**

4  
5 **Hannah Burnett<sup>1</sup>, Jonathan R Olsen<sup>1</sup>, Natalie Nicholls<sup>1</sup>, Richard Mitchell<sup>1</sup>**  
6 **<sup>1</sup>MRC/CSO Social and Public Health Sciences Unit, University of Glasgow, Berkeley**  
7 **Square, 99 Berkeley Street, Glasgow, G3 7HR, United Kingdom.**

8  
9 **Correspondence:**

10 **Hannah Burnett**

11 **MRC/CSO Social and Public Health Sciences Unit,**

12 **University of Glasgow,**

13 **Berkeley Square,**

14 **99 Berkeley Street,**

15 **Glasgow,**

16 **G3 7HR.**

17 **Email: h.burnett.1@research.gla.ac.uk**

18  
19 **Key words: mental health; COVID-19; public health.**

20  
21 **Word Count: 3,721**

22 **Tables: 4**

23 **Supplementary tables: 7**

## 24 ABSTRACT

26 **Objectives** Green space positively influences health and well-being, however inequalities  
27 in use of green space are prevalent. Movement restrictions enforced due to the COVID-19  
28 pandemic could have exacerbated existing inequalities regarding who visits green space.  
29 Therefore, this study aimed to explore how movement restrictions have changed the time  
30 spent visiting green space and experience of green space in the United Kingdom (UK) and  
31 how these differed by individual-level demographic characteristics.

33 **Design and outcome measures** A nationally representative cross-sectional survey  
34 administered through YouGov between 30<sup>th</sup> April–1<sup>st</sup> May 2020. Data were collected on the  
35 time spent visiting green space and change in the experience of green space, including  
36 missing social interaction, increased physical activity, and feeling greater mental health  
37 benefits in green space. Demographic information was collected on sex, age, ethnicity, social  
38 grade and dog ownership. Associations between specific outcome variables and predictors  
39 were assessed using logistic regression.

41 **Setting** United Kingdom, with population weights applied.

43 **Participants** 2,252 adults aged 18 years and over.

44 **Results** Overall, 63% of respondents reported a decrease in time spent visiting green space  
45 following movement restrictions. Lower social grade respondents were less likely to visit  
46 green space before *and* after restrictions were enforced (OR:0.35 (95% CI:0.24-0.51);  
47 OR:0.77 (95% CI:0.63-0.95)). Female respondents were more likely than male respondents to  
48 agree that green space benefitted their mental health more following restrictions (PP:0.70 vs.  
49 0.59). Older (65+) respondents were less likely than middle age (25-64 years) respondents to  
50 have visited green space following the restrictions (OR:0.79 (95% CI:0.63-0.98)).

51 **Conclusions** Inequalities in green space use were sustained, and possibly exacerbated,  
52 during movement restrictions. Our findings emphasise the importance of green spaces  
53 remaining open globally in any future ‘lockdowns’/pandemics. Further investigation is  
54 required to determine how visit patterns and experiences change through the different stages  
55 of the COVID-19 pandemic in the UK.

56 **(Word Count: 300)**

### 58 **Strengths and Limitations of this study**

- 59 • Our data are currently the only existing data covering change in the time spent visiting  
60 green space and experiences of green space for the UK population following the  
61 movement restrictions enforced due to the COVID-19 pandemic.
- 62 • The sample is nationally representative of UK adults.
- 63 • Collecting data on *both* time spent visiting green space and change in experience of green  
64 space during the movement restrictions is a strength of this study, compared to other  
65 surveys exploring change in green space use during the COVID-19 pandemic, including  
66 the Google COVID-19 Community Mobility Reports and Natural England’s People and  
67 Nature Survey.

- 1  
2  
3  
4 68 • The data collected for this study were from a cross-sectional survey, therefore it is not  
5 69 possible to demonstrate causality between change in green space use and experiences and  
6 70 the demographic data.  
7 71 • Certain variable response categories were necessarily recategorised for analysis, which  
8 72 meant that some distinctiveness across groups were lost, particularly for the ethnicity and  
9 73 age variables.  
10 74

## 11 74 12 75 **INTRODUCTION**

13 76  
14 77 Evidence suggests that exposure to green space has a positive influence on health and well-  
15 78 being.[1,2] Green space use is associated with increased levels of social interaction and  
16 79 physical activity, and decreased levels of all-cause mortality, loneliness and stress.[3–5]  
17 80 Additionally, there is evidence that contact with green space may disproportionately benefit  
18 81 disadvantaged populations, reducing health inequalities and therefore weakening the effects  
19 82 of poverty – known as the ‘equigenic’ effect.[6,7]  
20 83

21 84 The health impacts of contact with green spaces are quite well studied by both observational  
22 85 and experimental designs. There is rather less literature on the levels of, motivations for, and  
23 86 barriers to visiting green spaces in the first place. Recent surveys by Natural England and  
24 87 Scottish Natural Heritage have found that 74% of the English population and 70% of the  
25 88 Scottish population visit green space ‘frequently’ (once a month or more often). In both  
26 89 countries, the top three reasons stated for frequent green space use were health/exercise, dog  
27 90 walking, and to relax/unwind.[8,9] Further research exploring the motivations and reasons for  
28 91 visiting green space found that visitation frequency is affected by an individual’s feelings of  
29 92 nature connectedness, as well as their childhood exposure to nature.[10–12]. It is important to  
30 93 note that substantial inequalities in green space use have also been reported, with studies  
31 94 finding that females, older people and those from less advantaged socioeconomic positions  
32 95 (SEP) are more likely to be infrequent users than their male, younger and higher SEP  
33 96 counterparts.[9,13–15]  
34 97

35 98 In 2020, the United Kingdom (UK) experienced major disruption to everyday life due to the  
36 99 novel coronavirus disease 2019 (COVID-19) pandemic. COVID-19 is an infectious disease  
40 100 first identified in the city of Wuhan, China in December 2019.[16] As a response to the  
41 101 COVID-19 outbreak, the UK announced a series of movement restrictions from 23<sup>rd</sup> March  
42 102 2020. These included rules designed to increase social distancing, meaning that people could  
43 103 only leave their households to make ‘essential trips’ for food, medication and exercise.[17]  
44 104 Recent studies have highlighted the negative effects of COVID-19 on the UK population’s  
45 105 mental health and wellbeing, which are likely to be profound and long-lasting.[18] Research  
46 106 exploring the wider health effects of COVID-19 suggest that the negative indirect effects are  
47 107 being borne disproportionately by people who have fewer resources and poorer health.[19] If  
48 108 natural environments usually act to mitigate the connections between adversity and poor  
49 109 health,[6,7] it is important to assess the extent to which lockdown affected both use and  
50 110 experience of such environments. Future lockdowns and movement restrictions are highly  
51 111 likely as second, third and perhaps fourth waves of the pandemic take place around the world.  
52 112

53 113 The aim of this research was to explore changes in the time spent visiting green space and  
54 114 experience of visits to green space among the UK population following movement  
55 115 restrictions. The sociodemographic characteristics focused on were those identified by the  
56 116 literature as being most consistent markers of inequality in use. The research questions were:

- 1  
2  
3 117  
4 118 1) How did time spent visiting green space change following movement restrictions,  
5 119 compared with before, and for whom?  
6 120 2) How did experiences of visits to green space change following the restrictions, and  
7 121 did any change vary by sex, social grade, age, ethnicity and dog ownership?  
8 122 Specifically,  
9 123 a) Did respondents feel that green space benefitted their mental health more since  
10 124 restrictions than before?  
11 125 b) Did respondents miss social interaction in green space more following movement  
12 126 restrictions?  
13 127 c) Had physical activity increased following movement restrictions?  
14 128

## 17 129 METHODS

### 20 131 Survey design and sample

22 133 An online cross-sectional survey was administered by YouGov between 30<sup>th</sup> April and 1<sup>st</sup>  
23 134 May 2020.[20] Questions were answered by a sample of 2,252 adults from the UK (aged 18  
24 135 and over). The sample was drawn from a panel of over 800,000 individuals who specifically  
25 136 opted in to participate in online research activities. Sample members were randomly selected  
26 137 from the panel and sent an email providing a survey link. Table 1 shows the themes and  
27 138 specific survey instruments analysed in this paper. Only the respondents that visited green  
28 139 space following movement restrictions were asked the questions regarding change in  
29 140 experience of green space. Demographic information about participants was also collected  
30 141 (including sex, age and social grade, which was classified by occupation).[21,22] Although  
31 142 the sample was reasonably large, small numbers in variable response categories necessitated  
32 143 some category mergers (Table 1 and Supplementary Table 1).  
33 144

36 145 The survey covered adults from across the UK, with respondents from England (N=1,875),  
37 146 Scotland (N=209), Wales (N=107), and Northern Ireland (N=61). Weightings were applied to  
38 147 render the sample representative of UK adults (detailed below). When the survey was  
39 148 distributed, the same movement restrictions were implemented across the UK. These  
40 149 included only leaving home for limited purposes, such as medical needs, shopping for basic  
41 150 necessities (food and medicine), and exercising once a day alone/with members of your  
42 151 household.[23] Since then, the individual parliaments/assemblies representing these  
43 152 countries have imposed different COVID-19 policies.  
44 153

45 153  
46 154 **Table 1:** Survey themes and specific items analysed, including variables recategorised.

| Themes                                                  | Question/statement                                                                                                                                                                                                                             | Potential responses                                         | Recategorised                                             |
|---------------------------------------------------------|------------------------------------------------------------------------------------------------------------------------------------------------------------------------------------------------------------------------------------------------|-------------------------------------------------------------|-----------------------------------------------------------|
| Change in the amount of time spent visiting green space | <i>"Did you EVER visit a green space in the year before the movement restrictions were enforced in the UK?"</i>                                                                                                                                | Yes, I did<br>No, I didn't<br>Don't know/<br>can't recall   | -<br><i>Don't know/can't recall excluded (N=80, 3.5%)</i> |
|                                                         | <i>"Please think about your behaviour since the UK enforced a 'lock down' to restrict movement, as a result of the current Coronavirus (COVID-19) outbreak (i.e. since 23rd March 2020). Have you visited a green space since the movement</i> | Yes, I have<br>No, I haven't<br>Don't know/<br>can't recall | -                                                         |

|                                                                                                           |                                                                                                                                                                                                     |                                                                                                                                     |                                                                                                                                                                                                          |
|-----------------------------------------------------------------------------------------------------------|-----------------------------------------------------------------------------------------------------------------------------------------------------------------------------------------------------|-------------------------------------------------------------------------------------------------------------------------------------|----------------------------------------------------------------------------------------------------------------------------------------------------------------------------------------------------------|
|                                                                                                           | <i>restrictions have been enforced in the UK?"</i>                                                                                                                                                  |                                                                                                                                     | <i>Don't know/can't recall excluded (N=43, 1.9%)</i>                                                                                                                                                     |
|                                                                                                           | <i>"How much, if at all, has the amount of time that you have spent visiting green spaces changed since the 'lock down' movement restrictions began (i.e. 23rd March 2020) compared to before?"</i> | Increased a lot<br>Increased a little<br>No difference<br>Decreased a little<br>Decreased a lot<br>Don't know                       | 'Increased' (increased a lot and increased a little)<br>'Same' (no difference)<br>'Decreased' (decreased a lot and decreased a little)<br><br><i>Don't know excluded (N=74, 3.3%)</i>                    |
| Experience change (If respondent had visited a green space since the movement restrictions were enforced) | <i>"I feel that being in green spaces benefits my mental health <u>more now</u>, than before the movement restrictions were in place"</i>                                                           | Strongly agree<br>Slightly agree<br>Neither agree nor disagree<br>Slightly disagree<br>Strongly disagree<br>Don't know/can't recall | 'Agree' (strongly agree and slightly agree)<br>'Neither' (neither agree nor disagree)<br>'Disagree' (slightly disagree and strongly disagree)<br><br><i>Don't know/can't recall excluded (N=7, 0.6%)</i> |
|                                                                                                           | <i>"I have missed seeing and/or talking with people in green spaces <u>since</u> the movement restrictions were introduced"</i>                                                                     | Strongly agree<br>Slightly agree<br>Neither agree nor disagree<br>Slightly disagree<br>Strongly disagree<br>Don't know/can't recall | 'Agree' (strongly agree and slightly agree)<br>'Neither' (Neither agree nor disagree)<br>'Disagree' (slightly disagree and strongly disagree)<br><br><i>Don't know/can't recall excluded (N=8, 0.8%)</i> |
|                                                                                                           | <i>"I do more physical activity in green spaces <u>now</u>, than I did before the movement restrictions were introduced"</i>                                                                        | Strongly agree<br>Slightly agree<br>Neither agree nor disagree<br>Slightly disagree<br>Strongly disagree<br>Don't know/can't recall | 'Agree' (strongly agree and slightly agree)<br>'Neither' (Neither agree nor disagree)<br>'Disagree' (slightly disagree and strongly disagree)<br><br><i>Don't know/can't recall excluded (N=9, 0.8%)</i> |

*Don't know/ can't recall responses were all excluded from analysis (weighted counts and proportions reported above).*

## Demographic variables

Individual level demographic and socio-economic characteristics were captured from the survey, as follows: sex (male, female); age group (18-24 years, 25-64 years, 65+ years); ethnicity (White, Black, Asian and minority ethnic (BAME)); dog ownership (Yes, No); and social grade (ABC1, C2DE), derived by YouGov from combined occupational social grade categories. ABC1 was the higher social grade, and included non-manual workers, for example, senior managers and owners of small establishments. C2DE was the lower social grade, and included all manual workers, for example, shop assistants and labourers.[24] Hereafter, social grade will be described as higher and lower social grade.

## Patient and Public Involvement

There was no direct patient or public involvement in this study.

## 172 **Analyses**

### 173 174 **Descriptive statistics**

175  
176 The count and proportion of respondents who had: visited green space before and after  
177 movement restrictions were enforced; increased or decreased visitation; and agreed or  
178 disagreed with the three change in experience statements (Table 1) are presented. These were  
179 also explored by sex, age, ethnicity, dog ownership and social grade.

### 181 **Statistical analysis**

182  
183 Binary logistic regression analyses were conducted to assess the association between the  
184 individual predictor variables and the following two outcomes:

- 186 1. having visited green space in the year before movement restrictions were enforced;
- 187 2. having visited green space since movement restrictions were enforced, with this  
188 analysis being restricted to those who had reported visiting green space before  
189 movement restrictions.

190  
191 The associations between the individual predictor variables and each of the following  
192 outcomes were also assessed using multinomial logistic regression or, if appropriate, ordinal  
193 logistic regression, with results presented as predicted probabilities (PP):

- 195 1. Change in green space visitation following movement restrictions;
- 196 2. Levels of agreement that green space benefits their mental health more now (since  
197 movement restrictions compared to before);
- 198 3. Levels of agreement that they miss seeing/talking to people in green space now (since  
199 movement restrictions compared to before); and
- 200 4. Levels of agreement that they do more physical activity in green space now (since  
201 movement restrictions compared to before).

202  
203 The results of the binary logistic regression analyses were expressed as odds ratios (OR) with  
204 95% confidence intervals (CIs). Other results are presented as predicted outcome group  
205 probabilities for each variable. Predicted probabilities (PP) can be interpreted as a an  
206 indicator of likelihood, so that the closer the value is to 1.0, the greater the likelihood. We  
207 opted to present these results as predicted probabilities as they better illustrate not only the  
208 size of the association between the predictor variable and response category, but also the  
209 difference in this *between* variables. For example, the likelihood of men either decreasing,  
210 maintaining or increasing their time in green space can be more easily compared to the  
211 likelihood of those in the higher social grade category decreasing, maintaining or increasing  
212 their time in green space using predicted probability than with an OR or risk ratio (RR). This  
213 is because an OR or RR is expressed relative to the reference category. For those who prefer  
214 a RR, these are provided in the supplementary material (Supplementary Tables 2-5).

215  
216 Univariate models for each predictor were conducted first, followed by a fully adjusted  
217 model containing all predictors for each outcome. Weightings were calculated by YouGov,  
218 with the final data weighted to match the national profile of all adults aged 18 and over and  
219 applied during analyses to render the sample representative of UK adults.[22] All analyses  
220 were conducted in R v3.5.1,[25], and the *brant* package,[26], was used to check that the

221 proportionality of odds assumption for ordinal logistic regression was not violated.[27] A full  
222 R script is available on GitHub.[28]

223

## 224 RESULTS

225

### 226 Descriptive statistics

227

228 93% of all respondents had visited green space in the year before movement restrictions were  
229 enforced. In contrast, 53% of respondents reported visiting green space following movement  
230 restrictions. 63% of respondents reported that the amount of time they spent in green space  
231 had decreased since movement restrictions compared to before, with 15% reporting an  
232 increase, and 22% reporting no difference in the time spent visiting green space  
233 (Supplementary Table 6).

234

235 A greater proportion of respondents agreed (65%) than disagreed (10%) or neither agreed nor  
236 disagreed (25%) that green space benefited their mental health more following movement  
237 restrictions compared to before. More respondents agreed (54%) that they missed social  
238 interaction in green space more since movement restrictions, than disagreed (19%) or neither  
239 agreed nor disagreed (27%). 39% of respondents disagreed that they had increased physical  
240 activity in green space since movement restrictions, compared to 29% who agreed and 32%  
241 that neither agreed nor disagreed (Supplementary Table 7).

242

### 243 Change in visitation time

244

#### 245 Visiting green space before movement restrictions

246

247 In the adjusted logistic regression model for visiting green space in the year before movement  
248 restrictions were enforced (Table 2), only two variables had significant associations ( $p < 0.05$ ).  
249 Lower social grade respondents (OR:0.35 (95%CI:0.24-0.51)) and BAME (OR:0.43  
250 (95%CI:0.23-0.80)) respondents had lower odds of visiting green space before movement  
251 restrictions, compared to higher social grade and white respondents.

252

#### 253 Visiting green space following movement restrictions

254

255 Respondents in the lower social grade group were less likely to have visited green space than  
256 respondents in the higher social grade group (OR:0.77 (95%CI:0.63-0.95)) (Table 2). Older  
257 respondents (65+) were also less likely than middle age respondents (25-64) to have visited  
258 green space following the movement restrictions (OR:0.79 (95% CI:0.63-0.98)). Respondents  
259 who owned a dog/s were more likely than respondents who did not to have visited green  
260 space after movement restrictions were enforced (OR:1.42 (95%CI:1.14-1.78)).

261

#### 262 Change in time spent visiting green space

263

264 Following lockdown, changes in the time spent visiting green space was found to differ by  
265 demographic group. The likelihood of spending more time in greenspace was found to differ  
266 by social grade. Lower social grade respondents were less likely to report spending more time  
267 in green space following movement restrictions than higher social grade respondents  
268 (PP:0.09 vs. 0.16) (Table 3). Age was also found to be associated with change in time spent  
269 in green space. Older respondents (aged 65+) were the least likely to report increased green

1  
2  
3 270 space visits (PP:0.09(65+) compared to younger groups (PP: 0.14(25-64) and 0.21(18-24)).  
4 271 Females were more likely to report decreased green space visits compared to males (PP:0.67  
5 272 vs. 0.62), as well as being less likely to report no change in visit time (PP:0.20 vs.  
6 273 0.25)(Table 3). Finally, respondents without a dog/s were slightly more likely to report  
7 274 decreased green space visitations compared to dog owners(PP:0.66 vs. 0.62), and less likely  
8 275 to sustain their frequency of visitation (PP:0.21 vs. 0.28).  
9 276  
10 277  
11  
12  
13  
14  
15  
16  
17  
18  
19  
20  
21  
22  
23  
24  
25  
26  
27  
28  
29  
30  
31  
32  
33  
34  
35  
36  
37  
38  
39  
40  
41  
42  
43  
44  
45  
46  
47  
48  
49  
50  
51  
52  
53  
54  
55  
56  
57  
58  
59  
60



278

279 **Table 2:** Adjusted binary logistic regression models predicting green space visit before and after the movement restrictions were enforced. OR =  
 280 odds ratio; CI = confidence intervals.

|                      | Visited green space in the year before restrictions (yes) |         | Visited green space after restrictions (yes & visited green space before restrictions) |         |
|----------------------|-----------------------------------------------------------|---------|----------------------------------------------------------------------------------------|---------|
|                      | Adjusted                                                  |         | Adjusted                                                                               |         |
|                      | OR (95% CI)                                               | p-value | OR (95% CI)                                                                            | p-value |
| <b>Sex</b>           |                                                           |         |                                                                                        |         |
| <b>Male (ref)</b>    |                                                           |         |                                                                                        |         |
| <b>Female</b>        | 1.35 (0.94-1.95)                                          | 0.109   | 0.88 (0.72-1.07)                                                                       | 0.205   |
| <b>Social grade</b>  |                                                           |         |                                                                                        |         |
| <b>ABC1 (ref)</b>    |                                                           |         |                                                                                        |         |
| <b>C2DE</b>          | 0.35 (0.24-0.51)                                          | <0.001  | 0.77 (0.63-0.95)                                                                       | 0.013   |
| <b>Age</b>           |                                                           |         |                                                                                        |         |
| <b>18-24</b>         | 2.92 (1.00-8.57)                                          | 0.051   | 0.81 (0.54-1.21)                                                                       | 0.297   |
| <b>25-64 (ref)</b>   |                                                           |         |                                                                                        |         |
| <b>65+</b>           | 1.22 (0.80-1.85)                                          | 0.353   | 0.79 (0.63-0.98)                                                                       | 0.035   |
| <b>Ethnicity</b>     |                                                           |         |                                                                                        |         |
| <b>White (ref)</b>   |                                                           |         |                                                                                        |         |
| <b>BAME</b>          | 0.43 (0.23-0.80)                                          | 0.007   | 1.06 (0.67-1.68)                                                                       | 0.799   |
| <b>Dog ownership</b> |                                                           |         |                                                                                        |         |
| <b>No (ref)</b>      |                                                           |         |                                                                                        |         |
| <b>Yes</b>           | 1.29 (0.83-2.00)                                          | 0.260   | 1.42 (1.14-1.78)                                                                       | 0.002   |

281

282

283

284

285

**Table 3: Multinomial logistic regression models:** Predicted probabilities (likelihoods) of being in each outcome group for change in time visiting green space and levels of agreement that green space benefits their mental health more now (since movement restrictions were enforced compared to before). The p-values presented reflect the significance of each factor in the model.

|                      |               | Change in time spent visiting green space |      |           |                  | Using green spaces benefits my mental health more now |         |          |                  |
|----------------------|---------------|-------------------------------------------|------|-----------|------------------|-------------------------------------------------------|---------|----------|------------------|
|                      |               | Decreased                                 | Same | Increased | p-value          | Agree                                                 | Neither | Disagree | p-value          |
| <b>Sex</b>           | <b>Male</b>   | 0.62                                      | 0.25 | 0.13      | <i>0.041</i>     | 0.59                                                  | 0.31    | 0.10     | <i>0.004</i>     |
|                      | <b>Female</b> | 0.67                                      | 0.20 | 0.12      |                  | 0.70                                                  | 0.22    | 0.09     |                  |
| <b>Social grade</b>  | <b>ABC1</b>   | 0.65                                      | 0.19 | 0.16      | <i>&lt;0.001</i> | 0.68                                                  | 0.24    | 0.09     | <i>0.048</i>     |
|                      | <b>C2DE</b>   | 0.64                                      | 0.27 | 0.09      |                  | 0.59                                                  | 0.31    | 0.10     |                  |
| <b>Age</b>           | <b>18-24</b>  | 0.57                                      | 0.22 | 0.21      | <i>0.004</i>     | 0.55                                                  | 0.20    | 0.25     | <i>&lt;0.001</i> |
|                      | <b>25-64</b>  | 0.63                                      | 0.22 | 0.14      |                  | 0.68                                                  | 0.22    | 0.10     |                  |
|                      | <b>65+</b>    | 0.69                                      | 0.22 | 0.09      |                  | 0.55                                                  | 0.38    | 0.06     |                  |
| <b>Ethnicity</b>     | <b>White</b>  | 0.22                                      | 0.65 | 0.12      | 0.167            | 0.64                                                  | 0.26    | 0.10     | 0.063            |
|                      | <b>BAME</b>   | 0.30                                      | 0.56 | 0.14      |                  | 0.73                                                  | 0.25    | 0.02     |                  |
| <b>Dog ownership</b> | <b>No</b>     | 0.66                                      | 0.21 | 0.13      | <i>0.003</i>     | 0.67                                                  | 0.24    | 0.09     | 0.117            |
|                      | <b>Yes</b>    | 0.62                                      | 0.28 | 0.10      |                  | 0.59                                                  | 0.30    | 0.11     |                  |

286 **Table 4: Multinomial logistic regression models:** Predicted probabilities (likelihoods) of each levels of agreement that respondents missed  
 287 seeing/talking to people in green space more since movement restrictions were enforced compared to before, and levels of agreement that  
 288 respondents do more physical activity in green space following the movement restrictions. The p-values presented reflect the significance of  
 289 each factor in the model.

|                      |               | Miss social interaction in green spaces now |         |          |         | Do more physical activity in green spaces now |         |          |         |
|----------------------|---------------|---------------------------------------------|---------|----------|---------|-----------------------------------------------|---------|----------|---------|
|                      |               | Agree                                       | Neither | Disagree | p-value | Agree                                         | Neither | Disagree | p-value |
| <i>Sex</i>           | <b>Male</b>   | 0.45                                        | 0.30    | 0.25     | <0.001  | 0.24                                          | 0.37    | 0.40     | 0.096   |
|                      | <b>Female</b> | 0.58                                        | 0.26    | 0.16     |         | 0.27                                          | 0.29    | 0.43     |         |
| <i>Social grade</i>  | <b>ABC1</b>   | 0.53                                        | 0.27    | 0.20     | 0.256   | 0.27                                          | 0.31    | 0.42     | 0.307   |
|                      | <b>C2DE</b>   | 0.48                                        | 0.31    | 0.21     |         | 0.23                                          | 0.36    | 0.41     |         |
| <i>Age</i>           | <b>18-24</b>  | 0.59                                        | 0.23    | 0.18     | 0.672   | 0.44                                          | 0.23    | 0.33     | 0.002   |
|                      | <b>25-64</b>  | 0.51                                        | 0.28    | 0.21     |         | 0.29                                          | 0.31    | 0.40     |         |
|                      | <b>65+</b>    | 0.53                                        | 0.30    | 0.18     |         | 0.18                                          | 0.38    | 0.45     |         |
| <i>Ethnicity</i>     | <b>White</b>  | 0.52                                        | 0.28    | 0.20     | 0.802   | 0.25                                          | 0.32    | 0.42     | 0.063   |
|                      | <b>BAME</b>   | 0.52                                        | 0.31    | 0.16     |         | 0.33                                          | 0.44    | 0.22     |         |
| <i>Dog Ownership</i> | <b>No</b>     | 0.50                                        | 0.30    | 0.20     | 0.295   | 0.31                                          | 0.30    | 0.39     | <0.001  |
|                      | <b>Yes</b>    | 0.55                                        | 0.25    | 0.20     |         | 0.17                                          | 0.38    | 0.46     |         |

290

## 291 **Change in visit experience**

292

### 293 **Mental health benefits**

294

295 Females were more likely to agree than males that being in green space benefitted their  
296 mental health more following movement restrictions than before (PP:0.70 vs. 0.59). Higher  
297 social grade respondents were more likely to agree than lower social grade respondents  
298 (PP:0.68 vs. 0.59). Younger respondents were more likely to disagree that being in green  
299 space benefitted their mental health more following movement restrictions than before, whilst  
300 older respondents were less likely to disagree (PP:0.25(18-24) vs. 0.06(65+) and 0.10(25-  
301 64))(Table 3).

302

### 303 **Missed social interaction**

304

305 Female respondents were more likely to agree that they missed seeing and talking with other  
306 people in green space since movement restrictions compared to before than male respondents  
307 (PP:0.58 vs. 0.45)(Table 4).

308

### 309 **Increased physical activity**

310

311 Older respondents were less likely to agree that they had increased physical activity  
312 following movement restrictions (PP:0.18(65+) vs. 0.20(25-64) and 0.44(18-24)).  
313 Respondents who owned a dog/s were less likely than respondents without a dog/s to agree  
314 (PP:0.17 vs. 0.31)(Table 4).

315

## 316 **DISCUSSION**

317

318 Our findings suggest that inequalities in use of green space between demographic groups  
319 were sustained following movement restrictions, with lower social grade individuals less  
320 likely than higher social grade individuals to have visited green space before and since  
321 movement restrictions. Other existing inequalities in use were possibly exacerbated in the  
322 month after movement restrictions were enforced, with females being more likely to report a  
323 decrease in visits following movement restrictions.

324

325 The proportion of respondents who visited green space before and following movement  
326 restrictions decreased, from 93% to 53%. This was consistent with Natural England's  
327 findings from April 2020 where 49% of English adults reported green space visits in the  
328 previous two weeks.[29] Natural England conducted an online panel survey in April 2020  
329 (N=2,083), the survey covered only the English population, collecting information on the  
330 frequency of time in green and natural spaces in the 12 months, and then 2 weeks, prior to the  
331 survey.[30] The survey did not directly ask respondents about whether they felt their  
332 experiences within green space had changed following movement restrictions. A similar  
333 study focused on change in time spent visiting parks using the Google COVID-19  
334 Community Mobility Reports covering 620 counties across the United States(USA). They  
335 found a lower percentage decrease in park visits compared to our findings, reporting a 17-  
336 35% decrease in visits between 15<sup>th</sup> March-9<sup>th</sup> May 2020.[31] This difference may be  
337 explained by the focus on parks alone rather than different types of green space. However,  
338 additional research exploring the Google COVID-19 Community Mobility Reports found that

1  
2  
3 339 from 16<sup>th</sup> February-29<sup>th</sup> March 2020 park use decreased by 90% in Catalonia, 7% in Oslo,  
4 340 and 79% in New York County. In Stockholm, park use increased by 24% in the same  
5 341 timeframe.[32] This could be explained by Sweden having a less stringent approach to  
6 342 movement restrictions and instead relying on 'self-responsibility' to prevent the population  
7 343 having to restrict movement and stay at home.[33] The Swedish population may also be more  
8 344 culturally attuned to seeking time in nature to combat stress.

9 345  
10 346 Females and older individuals were more likely to have reported decreased visits to green  
11 347 space following movement restrictions. These findings corroborate with existing data  
12 348 collected before movement restrictions.[9,13,14] Boyd *et al.* analysed the Natural England  
13 349 'Monitor of Engagement with the Natural Environment' survey (N=63,890) with a focus on  
14 350 infrequent use. They found that females and older adults in England were more likely to be  
15 351 infrequent visitors.[9] Cohen *et al.* explored physical activity levels in Los Angeles' parks  
16 352 (N=1,318). They reported that age and sex were predictors of park use, with <5% of park  
17 353 users over 60 years old, and males using parks more often than females (62% vs. 38%).[13]

18 354  
19 355 Our findings suggested that existing patterns of gender inequality in use were sustained and  
20 356 potentially exacerbated due to fears arising from the COVID-19 pandemic. For example, an  
21 357 Ipsos MORI survey was conducted in April 2020, collecting data on gender differences in  
22 358 British attitudes towards COVID-19. They found that women were more likely to report  
23 359 following government rules to avoid leaving their home (78%) than men (68%) and felt more  
24 360 uncomfortable about returning to "normal"(N=1,000).[34,35]

25 361  
26 362 Previous studies have found that females feel more vulnerable than males in green spaces,  
27 363 especially without company.[14,15,36–39] There are few quantitative studies focusing on sex  
28 364 and the importance of social interaction as a motivation behind green space use. We found  
29 365 that females were more likely to agree that they missed seeing/talking with others in green  
30 366 space than males. This could be explained by the nature of the movement restrictions at this  
31 367 time, particularly the inability to socially interact with individuals outside your household in  
32 368 green space.

33 369  
34 370 Given older age is probably the most important risk factor for an adverse outcome from  
35 371 COVID-19,[40,41] it was not surprising that older individuals were less likely to report an  
36 372 increase in green space visits and to agree that they were doing more physical activity  
37 373 following movement restrictions. These findings corroborate with the majority of research  
38 374 exploring older age and green space use before the movement restrictions.[9,13,42] Older  
39 375 people in the UK have been found to be at particular risk of social isolation during social  
40 376 distancing, being less likely to use online communications and more likely to live alone than  
41 377 younger individuals.[19] Our findings also show that older people are less likely to have used  
42 378 green space during lockdown, further emphasising this point. The significant decrease in  
43 379 green space visits following movement restrictions for older respondents could be explained  
44 380 by the government advice for over 70s and those with an underlying health condition to  
45 381 shield, minimise interaction and stay at home, for around 12 weeks from 21<sup>st</sup> March  
46 382 2020.[43]

47 383  
48 384 Lower social grade respondents reported little or no change in visitation to green space, with  
49 385 time spent visiting green space remaining low both before and after movement restrictions.  
50 386 This is supported by previous studies exploring the association between socio-economic  
51 387 position (SEP) and green space use.[9,15,42] One possible explanation is a lack of interest in  
52 388 visiting green space reported by lower SEP individuals.[9] Additionally, the social grade

1  
2  
3 389 variable was categorised by occupation, and it was likely that individuals categorised as  
4 390 lower social grade were working in manual or service occupations.[24] They may have  
5 391 continued at their usual workplace/working hours during the COVID-19 pandemic. Findings  
6 392 from the Office for National Statistics support this explanation, with 30.5% of employees in  
7 393 the bottom three income deciles (monthly earnings of up to £1,450) considered as key  
8 394 workers in March/April 2020, compared to 26.4% in the top three income deciles (monthly  
9 395 earnings of up to £3,250).[44] Similarly, existing international research on public space use  
10 396 during COVID-19 restrictions worldwide state that skilled workers in the knowledge  
11 397 economy have shifted easily into online work from home, and can therefore make more use  
12 398 of green spaces during the movement restrictions.[45]  
13 399

14 400 The results for dog owners suggest that the movement restrictions have had an overall  
15 401 negative impact on their experiences within green space. Although dog owners were more  
16 402 likely to have visited green space following the movement restrictions than those that did not  
17 403 own a dog, they were less likely to agree that they had increased physical activity and more  
18 404 likely to have decreased visitations following the restrictions. These results differ from  
19 405 research undertaken in Canada that reported findings that dog ownership was associated with  
20 406 more outdoor play and less indoor play in Canadian youth at the start of the pandemic.[46]  
21 407 However, the focus on youth rather than adults may explain this difference in findings.  
22 408 Instead, the difference found in visits after restrictions were enforced may be due to dog  
23 409 owners having to walk their dog/s in green spaces *despite* the pandemic restrictions. In  
24 410 comparison between our results and those of other studies, we are mindful of the difference  
25 411 between number of visits and time spent in green spaces as measures of ‘use’. It would be  
26 412 entirely possible to increase one at the expense of the other and our data were not well suited  
27 413 to unpacking the relationship between them.  
28 414

## 29 415 **Strengths and limitations**

30 416

31 417 Our study has several strengths; to our knowledge, currently this is the only data covering  
32 418 UK population change in use and experiences within green space at the start of the movement  
33 419 restrictions from 23<sup>rd</sup> March 2020. This means that the data could provide timely information  
34 420 to local and national governments across the UK. It is important to understand the effects of  
35 421 the initial movement restrictions to generate policy recommendations for any future  
36 422 movement restrictions. The rapid collection of data, just over a month after the movement  
37 423 restrictions were introduced, reduces risk of recall bias. The sample is nationally  
38 424 representative of UK adults, with weightings calculated by YouGov and applied to all  
39 425 analyses, reducing risk of selection bias.[22]  
40 426

41 427 A further strength of our study is providing quantitative data on the importance of social  
42 428 interaction as a driver for using green space, which is under-reported in the literature. We  
43 429 analysed social grade at an individual level, which provides greater detail and accuracy of the  
44 430 respondent’s SEP than at neighbourhood level.  
45 431

46 432 There are some caveats. The survey design was cross-sectional, and we are unable to  
47 433 demonstrate causality between change in green space use and experiences and the  
48 434 demographic data. Additionally, the data on use and experiences are self-reported and  
49 435 therefore subjective. Certain variable response categories had to be recategorised in order to  
50 436 analyse them. This is particularly evident in the ethnicity and age variables, where some  
51 437 distinctiveness across groups was lost. The variable best capturing change in behaviour  
52

1  
2  
3 438 measured time spent in green space, but this made it difficult to understand whether  
4 439 respondents traded off time and numbers of visits.

5 440  
6 441 We encourage future research to explore the reasons *why* many patterns and changes in use of  
7 442 green space since movement restrictions have emerged. It would also be interesting to  
8 443 explore the change in patterns of use before and following movement restrictions for those  
9 444 that did not visit before the movement restrictions but did visit green space following  
10 445 restrictions.  
11 446

## 12 447 **CONCLUSION**

13 448  
14 449 Our study provides novel evidence to suggest that green space use and experiences were  
15 450 profoundly affected during the first month of movement restrictions in the UK which were  
16 451 part of the response to COVID-19. Our findings suggested that inequalities in use were  
17 452 sustained, with lower social grade individuals less likely to visit green space than higher  
18 453 social grade individuals before and following movement restrictions. It is possible that these  
19 454 inequalities were exacerbated, as females and older individuals were the groups most likely  
20 455 to have decreased visits following movement restrictions. Although these findings reflect the  
21 456 UK population's experience during the movement restrictions, they could be compared with  
22 457 countries such as Norway, USA, and Spain where green space visits also decreased. We  
23 458 believe that these findings emphasise the need for green spaces to remain open in any future  
24 459 'lockdowns' and for governments to actively encourage individuals to utilise these spaces to  
25 460 support their mental and physical health during subsequent waves of the pandemic. Further  
26 461 investigation is required to support these findings and how they may change through the  
27 462 stages of the COVID-19 pandemic and the relaxing, and potential re-introduction, of  
28 463 movement restrictions.  
29 464

## 30 465 **COMPETING INTERESTS**

31 466 None declared.

## 32 467 **DATA SHARING STATEMENT**

33 468  
34 469 We have made our research dataset publicly available (Datacite DOI:  
35 470 10.5525/gla.researchdata.1038 - embargoed until 31/10/2023).

## 36 471 **CONTRIBUTORS**

37 472  
38 473 HB, JRO and RM designed the study and survey; HB conducted data analysis which was  
39 474 reviewed by NN; HB wrote the first draft of the paper; all authors contributed to interpreting  
40 475 the results and revising the draft. The corresponding author attests that all listed authors meet  
41 476 authorship criteria and that no others meeting the criteria have been omitted.  
42 477

## 43 478 **FUNDING STATEMENT**

44 479 The authors (HB, JRO, NN & RM) are part of the Places and Health Programme at the  
45 480 MRC/CSO Social and Public Health Sciences Unit (SPHSU), University of Glasgow,  
46 481 supported by the Medical Research Council (MC\_UU\_12017/10) and the Chief Scientist  
47 482 Office (SPHSU10).  
48 483

## 49 484 **References:**

- 50  
51  
52  
53  
54  
55  
56  
57  
58  
59 483 1 Barton J, Pretty J. What is the Best Dose of Nature and Green Exercise for Improving  
60 484 Mental Health? A Multi-Study Analysis. *Environ Sci Technol* 2010;**44**:3947–55.

- 1  
2  
3 485 doi:10.1021/es903183r  
4 486 2 Douglas O, Lennon M, Scott M. Green space benefits for health and well-being: A  
5 487 life-course approach for urban planning, design and management. *CITIES* 2017;**66**:53–  
6 488 62. doi:10.1016/j.cities.2017.03.011  
7  
8 489 3 Twohig-Bennett C, Jones A. The health benefits of the great outdoors: A systematic  
9 490 review and meta-analysis of greenspace exposure and health outcomes. *Environ Res*  
10 491 2018;**166**:628–37. doi:10.1016/j.envres.2018.06.030  
11 492 4 Maas J, Van Dillen SME, Verheij RA, *et al.* Social contacts as a possible mechanism  
12 493 behind the relation between green space and health. *Health Place* 2009;**15**:586–95.  
13 494 doi:10.1016/j.healthplace.2008.09.006  
14  
15 495 5 Wells N, Evans G. NEARBY NATURE A Buffer of Life Stress Among Rural  
16 496 Children. *Environ Behav* 2003;**35**:311–30. doi:10.1177/0013916503251445  
17 497 6 Frumkin H, Bratman GN, Breslow SJ, *et al.* Nature Contact and Human Health: A  
18 498 Research Agenda. *Environ Health Perspect* 2017;**125**. doi:10.1289/EHP1663  
19 499 7 Mitchell RJ, Richardson EA, Shortt NK, *et al.* Neighborhood Environments and  
20 500 Socioeconomic Inequalities in Mental Well-Being. *Am J Prev Med* 2015;**49**:80–4.  
21 501 doi:10.1016/j.amepre.2015.01.017  
22  
23 502 8 Wilson V, Seddon B. Scotland’s People and Nature Survey 2017/18 – outdoor  
24 503 recreation and health modules. ( Scottish Natural Heritage Research Report No. 1062).  
25 504 Inverness: 2018.  
26 505 9 Boyd F, White MP, Bell SL, *et al.* Who doesn’t visit natural environments for  
27 506 recreation and why: A population representative analysis of spatial, individual and  
28 507 temporal factors among adults in England. *Landsc Urban Plan* 2018;**175**:102–13.  
29 508 doi:10.1016/j.landurbplan.2018.03.016  
30  
31 509 10 Bell SL, Phoenix C, Lovell R, *et al.* Green space, health and wellbeing: making space  
32 510 for individual agency. *Health Place* 2014;**30**:287–92.  
33 511 doi:10.1016/j.healthplace.2014.10.005  
34 512 11 Lin BB, Fuller RA, Bush R, *et al.* Opportunity or Orientation ? Who Uses Urban Parks  
35 513 and Why. 2014;**9**:1–7. doi:10.1371/journal.pone.0087422  
36  
37 514 12 Ward Thompson C, Aspinall P, Montarzino A. The Childhood Factor Adult Visits to  
38 515 Green Places and the Significance of Childhood Experience. *Environ Behav*  
39 516 2008;**40**:111–43. doi:10.1177/0013916507300119  
40 517 13 Cohen DA, McKenzie TL, Sehgal A, *et al.* Contribution of Public Parks to Physical  
41 518 Activity. *Am J Public Health* 2007;**97**:509–14. doi:10.2105/AJPH.2005.072447  
42 519 14 Lee ACK, Maheswaran R. The health benefits of urban green spaces: A review of the  
43 520 evidence. *J Public Health (Bangkok)* 2011;**33**:212–22. doi:10.1093/pubmed/fdq068  
44 521 15 Morris J, O’Brien E, Ambrose-Oji B, *et al.* Access for all? Barriers to accessing  
45 522 woodlands and forests in Britain. *Local Environ Int J Justice Sustain* 2011;**16**:375–96.  
46 523 doi:10.1080/13549839.2011.576662  
47  
48 524 16 Wynants L, Van Calster B, Bonten MMJ, *et al.* Prediction models for diagnosis and  
49 525 prognosis of covid-19 infection: systematic review and critical appraisal . *BMJ*  
50 526 2020;**369**. doi:10.1136/bmj.m1328  
51 527 17 Johnson B. Prime Minister’s statement on coronavirus (COVID-19): 23 March 2020.  
52 528 GOV.UK. 2020.<https://www.gov.uk/government/speeches/pm-address-to-the-nation-on-coronavirus-23-march-2020> (accessed 7 Jul 2020).  
53 529  
54 530 18 O’Connor RC, Wetherall K, Cleare S, *et al.* Mental health and wellbeing during the  
55 531 COVID-19 pandemic: longitudinal analyses of adults in the UK COVID-19 Mental  
56 532 Health & Wellbeing study. *Br J Psychiatry* 2020;:1–17. doi:10.1192/bjp.2020.212  
57 533 19 Douglas M, Katikireddi SV, Taulbut M, *et al.* Mitigating the wider health effects of  
58 534 covid-19 pandemic response. *BMJ* 2020;**369**. doi:10.1136/bmj.m1557



- 1  
2  
3 535 20 YouGov. About YouGov Company. <https://yougov.co.uk/about/> (accessed 8 Jun  
4 536 2020).
- 5 537 21 YouGov and ESOMAR (World Association for Social Opinion and Market Research).  
6 538 ESOMAR 28: 28 Questions to help Online Research Buyers. The Netherlands: 2012.  
7 539 [http://cdn.yougov.com/cumulus\\_uploads/document/t3r5k565j5/ESOMAR\\_28.pdf](http://cdn.yougov.com/cumulus_uploads/document/t3r5k565j5/ESOMAR_28.pdf)  
8 540 (accessed 8 Jun 2020).
- 9 541 22 YouGov. Panel Methodology. <https://yougov.co.uk/about/panel-methodology/>  
10 542 (accessed 8 Jun 2020).
- 11 543 23 Cabinet Office. Staying at home and away from others (social distancing). London:  
12 544 2020. [https://www.gov.uk/government/publications/full-guidance-on-staying-at-home-](https://www.gov.uk/government/publications/full-guidance-on-staying-at-home-and-away-from-others)  
13 545 [and-away-from-others](https://www.gov.uk/government/publications/full-guidance-on-staying-at-home-and-away-from-others) (accessed 8 Oct 2020).
- 14 546 24 The Market Research Society (MRS). Definitions employed in Social Grading. MRS.  
15 547 [https://www.mrs.org.uk/pdf/Definitions used in Social Grading based on OG7.pdf](https://www.mrs.org.uk/pdf/Definitions%20used%20in%20Social%20Grading%20based%20on%20OG7.pdf)  
16 548 (accessed 2 Jul 2020).
- 17 549 25 R Core Team. R: A Language and Environment for Statistical Computing.  
18 550 2018.<https://www.r-project.org/>
- 19 551 26 Schlegel BE. Package brant. <https://benjaminschlegel.ch/en/r/brant/> (accessed 29 Oct  
20 552 2020).
- 21 553 27 Brant R. Assessing proportionality in the proportional odds model for ordinal logistic  
22 554 regression. *Biometrics* 1990;**46**:1171–8.
- 23 555 28 Burnett H. Change in green space use and experiences following UK restrictions on  
24 556 movement. GitHub. 2020.[https://github.com/hannahburnett/greenspace-covid\\_code](https://github.com/hannahburnett/greenspace-covid_code)  
25 557 (accessed 21 Jul 2020).
- 26 558 29 Natural England. The People and Nature Survey for England: Monthly interim  
27 559 indicators for April 2020 (Experimental Statistics) . Nat. Engl.  
28 560 2020.[https://www.gov.uk/government/publications/the-people-and-nature-survey-for-](https://www.gov.uk/government/publications/the-people-and-nature-survey-for-england-monthly-interim-indicators-for-april-2020-experimental-statistics/the-people-and-nature-survey-for-england-monthly-interim-indicators-for-april-2020-experimental-statistics)  
29 561 [england-monthly-interim-indicators-for-april-2020-experimental-statistics/the-people-](https://www.gov.uk/government/publications/the-people-and-nature-survey-for-england-monthly-interim-indicators-for-april-2020-experimental-statistics/the-people-and-nature-survey-for-england-monthly-interim-indicators-for-april-2020-experimental-statistics)  
30 562 [and-nature-survey-for-england-monthly-interim-indicators-for-april-2020-](https://www.gov.uk/government/publications/the-people-and-nature-survey-for-england-monthly-interim-indicators-for-april-2020-experimental-statistics/the-people-and-nature-survey-for-england-monthly-interim-indicators-for-april-2020-experimental-statistics)  
31 563 [experimental-statistics](https://www.gov.uk/government/publications/the-people-and-nature-survey-for-england-monthly-interim-indicators-for-april-2020-experimental-statistics/the-people-and-nature-survey-for-england-monthly-interim-indicators-for-april-2020-experimental-statistics) (accessed 25 Jun 2020).
- 32 564 30 Natural England. The People and Nature Survey For England. 2020.  
33 565 <http://publications.naturalengland.org.uk/publication/6382837173583872>
- 34 566 31 Curtis DS, Rigolon A, Schmalz DL, *et al.* Getting out while staying in: Park use  
35 567 decreased during the COVID-19 pandemic, especially where park availability was  
36 568 low. *Cent Open Sci OSF Prepr* Published Online First: 2020.  
37 569 doi:10.31235/osf.io/9xzgf
- 38 570 32 Barton D, Haase D, Mascarenhas A, *et al.* Enabling Access to Greenspace During the  
39 571 Covid-19 Pandemic-Perspectives from Five Cities. *Nat. Cities*.  
40 572 2020.[https://www.thenatureofcities.com/2020/05/04/enabling-access-to-greenspace-](https://www.thenatureofcities.com/2020/05/04/enabling-access-to-greenspace-during-the-covid-19-pandemic-perspectives-from-five-cities/)  
41 573 [during-the-covid-19-pandemic-perspectives-from-five-cities/](https://www.thenatureofcities.com/2020/05/04/enabling-access-to-greenspace-during-the-covid-19-pandemic-perspectives-from-five-cities/) (accessed 23 Oct 2020).
- 42 574 33 Savage M. Lockdown, what lockdown? Sweden’s unusual response to coronavirus.  
43 575 BBC News. 2020.
- 44 576 34 Ipsos MORI. Gender differences in attitudes towards Coronavirus. 2020.  
45 577 [https://www.ipsos.com/sites/default/files/ct/news/documents/2020-](https://www.ipsos.com/sites/default/files/ct/news/documents/2020-05/fawcett_society_presentation.pdf)  
46 578 [05/fawcett\\_society\\_presentation.pdf](https://www.ipsos.com/sites/default/files/ct/news/documents/2020-05/fawcett_society_presentation.pdf) (accessed 10 Jul 2020).
- 47 579 35 Ipsos MORI, The Fawcett Society. 6 in 10 women finding it harder to stay positive  
48 580 day-to-day due to Coronavirus: Women more likely to bearing the emotional and  
49 581 impact of the pandemic . Fawcett Soc.  
50 582 2020.[https://www.fawcettsociety.org.uk/Handlers/Download.ashx?IDMF=f173fde3-](https://www.fawcettsociety.org.uk/Handlers/Download.ashx?IDMF=f173fde3-4edb-4c51-8453-7244e867ed90)  
51 583 [4edb-4c51-8453-7244e867ed90](https://www.fawcettsociety.org.uk/Handlers/Download.ashx?IDMF=f173fde3-4edb-4c51-8453-7244e867ed90) (accessed 10 Jul 2020).
- 52 584 36 Thompson CW, Aspinall P, Bell S, *et al.* “It Gets You Away From Everyday Life”:

- 1  
2  
3 585 Local Woodlands and Community Use—What Makes a Difference? *Landsc Res*  
4 586 2007;**30**:109–46. doi:10.1080/0142639042000324794  
5 587 37 Burgess J. Focusing on Fear: The Use of Focus Groups in a Project for the Community  
6 588 Forest Unit, Countryside Commission. 1996.  
7 589 38 Richardson EA, Mitchell R. Gender differences in relationships between urban green  
8 590 space and health in the United Kingdom. *Soc Sci Med* 2010;**71**:568–75.  
9 591 doi:10.1016/J.SOCSCIMED.2010.04.015  
10 592 39 O’Brien L, Morris J. Well-being for all? The social distribution of benefits gained  
11 593 from woodlands and forests in Britain. *Local Environ Int J Justice Sustain*  
12 594 2014;**19**:356–83. doi:10.1080/13549839.2013.790354  
13 595 40 Public Health England. Disparities in the risk and outcomes from COVID-19. London:  
14 596 2020. [www.facebook.com/PublicHealthEngland](http://www.facebook.com/PublicHealthEngland) (accessed 26 Jul 2020).  
15 597 41 Office for National Statistics. Deaths registered weekly in England and Wales,  
16 598 provisional: week ending 10 July 2020. ONS.  
17 599 2020.<https://www.ons.gov.uk/peoplepopulationandcommunity/birthsdeathsandmarriages/deaths/bulletins/deathsregisteredweeklyinenglandandwalesprovisional/latest#deaths-registered-by-age-group> (accessed 26 Jul 2020).  
18 600  
19 601  
20 602 42 TNS. Scotland’s People and Nature Survey 2013/14. (Scottish Natural Heritage  
21 603 Commissioned Report No. 679). 2014.  
22 604 43 Johnson B. Prime Minister’s statement on coronavirus (COVID-19): 16 March 2020.  
23 605 GOV.UK. 2020.<https://www.gov.uk/government/speeches/pm-statement-on-coronavirus-16-march-2020> (accessed 26 Jun 2020).  
24 606  
25 607 44 Office for National Statistics. Coronavirus and how people spent their time under  
26 608 lockdown. ONS.  
27 609 2020.<https://www.ons.gov.uk/economy/nationalaccounts/satelliteaccounts/bulletins/coronavirusandhowpeoplespenttheirtimeunderrestrictions/28marchto26april2020>  
28 610 (accessed 16 Jul 2020).  
29 611  
30 612 45 Honey-Rosés J, Anguelovski I, Chireh VK, *et al*. The impact of COVID-19 on public  
31 613 space: an early review of the emerging questions – design, perceptions and inequities.  
32 614 *Cities Heal* 2020;**1**–17. doi:10.1080/23748834.2020.1780074  
33 615 46 Moore SA, Faulkner G, Rhodes RE, *et al*. Impact of the COVID-19 virus outbreak on  
34 616 movement and play behaviours of Canadian children and youth: a national survey. *Int*  
35 617 *J Behav Nutr Phys Act* 2020;**17**. doi:10.1186/s12966-020-00987-8  
36 618  
37  
38  
39  
40  
41  
42  
43  
44  
45  
46  
47  
48  
49  
50  
51  
52  
53  
54  
55  
56  
57  
58  
59  
60

## Supplementary Materials

**Supplementary Table 1:** Category mergers of the response categories (ethnicity, age, social grade, sex and dog ownership).

|                      | <b>Original categories (Unweighted N)</b> | <b>New categories (Unweighted N)</b> |
|----------------------|-------------------------------------------|--------------------------------------|
| <b>Ethnicity</b>     | White British (1659)                      | White (1745)                         |
|                      | Any other white background (86)           |                                      |
|                      | White and Black Caribbean (6)             | BAME (87)                            |
|                      | White and Black African (4)               |                                      |
|                      | White and Asian (8)                       |                                      |
|                      | Any other mixed background (8)            |                                      |
|                      | Indian (17)                               |                                      |
|                      | Pakistani (5)                             |                                      |
|                      | Bangladeshi (4)                           |                                      |
|                      | Any other Asian background (3)            |                                      |
|                      | Black Caribbean (4)                       |                                      |
|                      | Black African (3)                         |                                      |
|                      | Any other black background (3)            |                                      |
|                      | Chinese (10)                              |                                      |
|                      | Other ethnic group (12)                   |                                      |
|                      | Prefer not to say (19)                    | Missing (420)                        |
|                      | Not answered (401)                        |                                      |
|                      |                                           |                                      |
|                      |                                           |                                      |
|                      | <b>Age</b>                                | 18-24 (165)                          |
| 25-34 (316)          |                                           | 25-64 (1497)                         |
| 35-44 (396)          |                                           |                                      |
| 45-54 (398)          |                                           |                                      |
| 55-64 (387)          |                                           |                                      |
| 65+ (590)            |                                           | 65+ (590)                            |
|                      |                                           |                                      |
| <b>Social grade</b>  | ABC1 (1419)                               |                                      |
|                      | C2DE (833)                                |                                      |
|                      |                                           |                                      |
| <b>Sex</b>           | Male (1018)                               |                                      |
|                      | Female (1234)                             |                                      |
|                      |                                           |                                      |
| <b>Dog ownership</b> | Yes (616)                                 |                                      |
|                      | No (1636)                                 |                                      |

**Supplementary Table 2:** Multinomial logistic regression models of being in each outcome group for change in time visiting green space (increase or decrease in visits to green space since movement restrictions were enforced compared to before), results are reported as Risk Ratios (RR) with 95% Lower Confidence Limits (LCL) and Upper Confidence Limits (UCL); **p<0.05**.

|                      |                          | RR of Decreased visits to "Same" and 95% CIs |             |             | RR of Increased to "Same" and 95% CIs |             |             |
|----------------------|--------------------------|----------------------------------------------|-------------|-------------|---------------------------------------|-------------|-------------|
|                      |                          | RR                                           | LCL         | UCL         | RR                                    | LCL         | UCL         |
|                      | <b>Intercept</b>         | 3.11                                         | 2.48        | 3.90        | 0.96                                  | 0.71        | 1.30        |
| <i>Sex</i>           | <b>Female (Ref=Male)</b> | <b>1.34</b>                                  | <b>1.07</b> | <b>1.69</b> | 1.19                                  | 0.85        | 1.66        |
| <i>Social Grade</i>  | <b>C2DE (Ref=ABC1)</b>   | <b>0.70</b>                                  | <b>0.56</b> | <b>0.88</b> | <b>0.40</b>                           | <b>0.28</b> | <b>0.56</b> |
| <i>Age group</i>     | <b>18-24 (Ref=25-64)</b> | 0.91                                         | 0.56        | 1.47        | 1.50                                  | 0.82        | 2.73        |
|                      | <b>65+ (Ref=25-64)</b>   | 1.13                                         | 0.87        | 1.46        | <b>0.64</b>                           | <b>0.43</b> | <b>0.97</b> |
| <i>Ethnicity</i>     | <b>BAME (Ref=White)</b>  | 0.62                                         | 0.38        | 1.02        | 0.83                                  | 0.42        | 1.62        |
| <i>Dog Ownership</i> | <b>Yes (Ref=No)</b>      | <b>0.69</b>                                  | <b>0.53</b> | <b>0.88</b> | <b>0.56</b>                           | <b>0.38</b> | <b>0.82</b> |

**Supplementary Table 3:** Multinomial logistic regression models of being in each outcome group for levels of agreement that green space benefits their mental health more now (since movement restrictions were enforced compared to before), results are reported as Risk Ratios (RR) with 95% Lower Confidence Limits (LCL) and Upper Confidence Limits (UCL); **p<0.05**.

|                      |                          | RR of Agree to "Neither agree or disagree" and 95% CIs |             |             | RR of Disagree to "Neither agree or disagree" and 95% CIs |             |             |
|----------------------|--------------------------|--------------------------------------------------------|-------------|-------------|-----------------------------------------------------------|-------------|-------------|
|                      |                          | RR                                                     | LCL         | UCL         | RR                                                        | LCL         | UCL         |
|                      | <b>Intercept</b>         | 2.94                                                   | 2.17        | 3.99        | 0.43                                                      | 0.27        | 0.70        |
| <i>Sex</i>           | <b>Female (Ref=Male)</b> | <b>1.72</b>                                            | <b>1.24</b> | <b>2.39</b> | 1.29                                                      | 0.76        | 2.18        |
| <i>Social Grade</i>  | <b>C2DE (Ref=ABC1)</b>   | <b>0.67</b>                                            | <b>0.48</b> | <b>0.93</b> | 0.88                                                      | 0.52        | 1.49        |
| <i>Age group</i>     | <b>18-24 (Ref=25-64)</b> | 0.87                                                   | 0.40        | 1.89        | <b>2.71</b>                                               | <b>1.03</b> | <b>7.12</b> |
|                      | <b>65+ (Ref=25-64)</b>   | <b>0.47</b>                                            | <b>0.33</b> | <b>0.67</b> | <b>0.37</b>                                               | <b>0.19</b> | <b>0.73</b> |
| <i>Ethnicity</i>     | <b>BAME (Ref=White)</b>  | 1.20                                                   | 0.54        | 2.69        | 0.21                                                      | 0.03        | 1.43        |
| <i>Dog Ownership</i> | <b>Yes (Ref=No)</b>      | 0.72                                                   | 0.51        | 1.02        | 1.02                                                      | 0.59        | 1.76        |

**Supplementary Table 4:** Multinomial logistic regression models of being in each outcome group for levels of agreement that respondents missed seeing/talking to people in green space more since movement restrictions were enforced compared to before, results are reported as Risk Ratios (RR) with 95% Lower Confidence Limits (LCL) and Upper Confidence Limits (UCL); **p<0.05**.

|                      |                          | RR of Agree to "Neither agree or disagree" and 95% CIs |             |             | RR of Disagree to "Neither agree or disagree" and 95% CIs |      |      |
|----------------------|--------------------------|--------------------------------------------------------|-------------|-------------|-----------------------------------------------------------|------|------|
|                      |                          | RR                                                     | LCL         | UCL         | RR                                                        | LCL  | UCL  |
|                      | <b>Intercept</b>         | 1.47                                                   | 1.08        | 1.99        | 0.89                                                      | 0.62 | 1.27 |
| <i>Sex</i>           | <b>Female (Ref=Male)</b> | <b>1.53</b>                                            | <b>1.11</b> | <b>2.13</b> | 0.76                                                      | 0.50 | 1.14 |
| <i>Social Grade</i>  | <b>C2DE (Ref=ABC1)</b>   | 0.76                                                   | 0.54        | 1.06        | 0.90                                                      | 0.60 | 1.36 |
| <i>Age group</i>     | <b>18-24 (Ref=25-64)</b> | 1.40                                                   | 0.69        | 2.86        | 1.00                                                      | 0.40 | 2.49 |
|                      | <b>65+ (Ref=25-64)</b>   | 0.98                                                   | 0.67        | 1.43        | 0.78                                                      | 0.49 | 1.26 |
| <i>Ethnicity</i>     | <b>BAME (Ref=White)</b>  | 0.91                                                   | 0.43        | 1.93        | 0.72                                                      | 0.27 | 1.91 |
| <i>Dog Ownership</i> | <b>Yes (Ref=No)</b>      | 1.33                                                   | 0.92        | 1.91        | 1.15                                                      | 0.74 | 1.80 |

**Supplementary Table 5:** Multinomial logistic regression models of being in each outcome group for levels of agreement that respondents do more physical activity in green space following the movement restrictions, results are reported as Risk Ratios (RR) with 95% Lower Confidence Limits (LCL) and Upper Confidence Limits (UCL); **p<0.05**.

|                      |                          | RR of Agree to "Neither agree or disagree" and 95% CIs |             |             | RR of Disagree to "Neither agree or disagree" and 95% CIs |             |             |
|----------------------|--------------------------|--------------------------------------------------------|-------------|-------------|-----------------------------------------------------------|-------------|-------------|
|                      |                          | RR                                                     | LCL         | UCL         | RR                                                        | LCL         | UCL         |
|                      | <b>Intercept</b>         | 1.09                                                   | 0.78        | 1.51        | 1.22                                                      | 0.89        | 1.66        |
| <i>Sex</i>           | <b>Female (Ref=Male)</b> | 1.44                                                   | 0.99        | 2.08        | 1.35                                                      | 0.97        | 1.88        |
| <i>Social Grade</i>  | <b>C2DE (Ref=ABC1)</b>   | 0.75                                                   | 0.51        | 1.09        | 0.85                                                      | 0.61        | 1.19        |
| <i>Age group</i>     | <b>18-24 (Ref=25-64)</b> | 2.07                                                   | 0.99        | 4.36        | 1.13                                                      | 0.52        | 2.49        |
|                      | <b>65+ (Ref=25-64)</b>   | <b>0.51</b>                                            | <b>0.32</b> | <b>0.80</b> | 0.93                                                      | 0.64        | 1.34        |
| <i>Ethnicity</i>     | <b>BAME (Ref=White)</b>  | 0.95                                                   | 0.44        | 2.08        | <b>0.38</b>                                               | <b>0.15</b> | <b>0.97</b> |
| <i>Dog Ownership</i> | <b>Yes (Ref=No)</b>      | <b>0.43</b>                                            | <b>0.28</b> | <b>0.66</b> | 0.95                                                      | 0.68        | 1.35        |

**Supplementary Table 6:** Change in green space visit frequency since restrictions by individual demographic and socio-economic characteristics (unweighted).

|                                | Visited green space in the year before restrictions |                  | Visited green space after restrictions (only those who visited green space before restrictions) |                   | Green space visitation change since lockdown |                     |                          |
|--------------------------------|-----------------------------------------------------|------------------|-------------------------------------------------------------------------------------------------|-------------------|----------------------------------------------|---------------------|--------------------------|
|                                | Yes (N=2045, 93.5%)                                 | No (N=142, 6.4%) | Yes (N=1099, 53.8%)                                                                             | No (N=943, 46.2%) | Decreased (N=1392, 63.3%)                    | Same (N=473, 21.5%) | Increased (N=333, 15.2%) |
|                                | % (N)                                               | % (N)            | % (N)                                                                                           | % (N)             | % (N)                                        | % (N)               | % (N)                    |
| <i>Sex</i>                     |                                                     |                  |                                                                                                 |                   |                                              |                     |                          |
| <b>Male (ref)</b>              | 92.6% (919)                                         | 7.4% (73)        | 55.2% (507)                                                                                     | 44.8% (411)       | 61.6% (609)                                  | 23.5% (232)         | 15% (148)                |
| <b>Female</b>                  | 94.2% (1126)                                        | 5.8% (69)        | 52.7% (592)                                                                                     | 47.3% (532)       | 64.8% (783)                                  | 19.9% (241)         | 15.3% (185)              |
| <i>Social grade</i>            |                                                     |                  |                                                                                                 |                   |                                              |                     |                          |
| <b>ABC1 (ref)</b>              | 95.8% (1328)                                        | 4.2% (58)        | 56.7% (753)                                                                                     | 43.3% (574)       | 62.9% (871)                                  | 18.8% (260)         | 18.3% (254)              |
| <b>C2DE</b>                    | 89.5% (717)                                         | 10.5% (84)       | 48.4% (346)                                                                                     | 51.6% (369)       | 64.1% (521)                                  | 26.2% (213)         | 9.7% (79)                |
| <i>Age</i>                     |                                                     |                  |                                                                                                 |                   |                                              |                     |                          |
| <b>18-24</b>                   | 93.3% (139)                                         | 6.7% (10)        | 56.9% (78)                                                                                      | 43.1% (59)        | 58.4% (87)                                   | 20.8% (31)          | 20.8% (31)               |
| <b>25-64 (ref)</b>             | 93.6% (1364)                                        | 6.4% (94)        | 56.1% (765)                                                                                     | 43.9% (598)       | 61.8% (906)                                  | 21.5% (315)         | 16.7% (245)              |
| <b>65+</b>                     | 93.4% (542)                                         | 6.6% (38)        | 47.2% (256)                                                                                     | 52.8% (286)       | 68.4% (399)                                  | 21.8% (127)         | 9.8% (57)                |
| <i>Ethnicity</i>               |                                                     |                  |                                                                                                 |                   |                                              |                     |                          |
| <b>White (ref)</b>             | 93.6% (1592)                                        | 6.4% (109)       | 52.1% (828)                                                                                     | 47.9% (762)       | 64.1% (1098)                                 | 22.5% (385)         | 13.4% (229)              |
| <b>BAME</b>                    | 84.1% (69)                                          | 15.9% (13)       | 47.8% (33)                                                                                      | 52.2% (36)        | 57% (45)                                     | 30.4% (24)          | 12.7% (10)               |
| <i>Dog ownership</i>           |                                                     |                  |                                                                                                 |                   |                                              |                     |                          |
| <b>Don't own a dog/s (ref)</b> | 93.1% (1476)                                        | 6.9% (109)       | 51.4% (757)                                                                                     | 48.6% (717)       | 64.4% (1027)                                 | 19.5% (311)         | 16.1% (256)              |
| <b>Own a dog/s</b>             | 94.5% (569)                                         | 5.5% (33)        | 60.2% (342)                                                                                     | 39.8% (226)       | 60.4% (365)                                  | 26.8% (162)         | 12.7% (77)               |

Don't know/ can't recall responses were all excluded from analysis.



**Supplementary Table 7:** Change in green space experience since restrictions by individual demographic and socio-economic characteristics (unweighted).

|                                | Using green spaces benefits my mental health more now |                        |                        | Miss social interaction in green spaces now |                        |                         | Do more physical activity in green spaces now |                        |                         |
|--------------------------------|-------------------------------------------------------|------------------------|------------------------|---------------------------------------------|------------------------|-------------------------|-----------------------------------------------|------------------------|-------------------------|
|                                | Agree (N=721, 65.8%)                                  | Neither (N=272, 24.8%) | Disagree (N=102, 9.3%) | Agree (N=590, 54.1%)                        | Neither (N=288, 26.4%) | Disagree (N=213, 19.5%) | Agree (N=322, 29.5%)                          | Neither (N=337, 30.9%) | Disagree (N=431, 39.5%) |
|                                | % (N)                                                 |                        |                        | % (N)                                       |                        |                         | % (N)                                         |                        |                         |
| <i>Sex</i>                     |                                                       |                        |                        |                                             |                        |                         |                                               |                        |                         |
| <b>Male (ref)</b>              | 59.6% (300)                                           | 30.8% (155)            | 9.5% (48)              | 45.8% (231)                                 | 30% (151)              | 24.2% (122)             | 27.4% (137)                                   | 35.4% (177)            | 37.2% (186)             |
| <b>Female</b>                  | 71.1% (421)                                           | 19.8% (117)            | 9.1% (54)              | 61.2% (359)                                 | 23.3% (137)            | 15.5% (91)              | 31.4% (185)                                   | 27.1% (160)            | 41.5% (245)             |
| <i>Social grade</i>            |                                                       |                        |                        |                                             |                        |                         |                                               |                        |                         |
| <b>ABC1 (ref)</b>              | 68% (511)                                             | 22.9% (172)            | 9.1% (68)              | 54.9% (412)                                 | 25.3% (190)            | 19.7% (148)             | 31.6% (236)                                   | 28.9% (216)            | 39.6% (296)             |
| <b>C2DE</b>                    | 61% (210)                                             | 29.1% (100)            | 9.9% (34)              | 52.2% (178)                                 | 28.7% (98)             | 19.1% (65)              | 25.1% (86)                                    | 35.4% (121)            | 39.5% (135)             |
| <i>Age</i>                     |                                                       |                        |                        |                                             |                        |                         |                                               |                        |                         |
| <b>18-24</b>                   | 67.5% (52)                                            | 19.5% (15)             | 13% (10)               | 64.9% (50)                                  | 22.1% (17)             | 13% (10)                | 48.7% (38)                                    | 16.7% (13)             | 34.6% (27)              |
| <b>25-64 (ref)</b>             | 69% (526)                                             | 21% (160)              | 10% (76)               | 53.7% (407)                                 | 25.9% (196)            | 20.4% (155)             | 30.8% (233)                                   | 30.1% (228)            | 39.1% (296)             |
| <b>65+</b>                     | 55.9% (143)                                           | 37.9% (97)             | 6.2% (16)              | 52% (133)                                   | 29.3% (75)             | 18.8% (48)              | 20% (51)                                      | 37.6% (96)             | 42.4% (108)             |
| <i>Ethnicity</i>               |                                                       |                        |                        |                                             |                        |                         |                                               |                        |                         |
| <b>White (ref)</b>             | 62.8% (518)                                           | 27.3% (225)            | 9.9% (82)              | 51.6% (423)                                 | 28% (230)              | 20.4% (167)             | 26.5% (218)                                   | 32.3% (266)            | 41.2% (339)             |
| <b>BAME</b>                    | 75% (24)                                              | 21.9% (7)              | 3.1% (1)               | 51.5% (17)                                  | 30.3% (10)             | 18.2% (6)               | 38.7% (12)                                    | 38.7% (12)             | 22.6% (7)               |
| <i>Dog ownership</i>           |                                                       |                        |                        |                                             |                        |                         |                                               |                        |                         |
| <b>Don't own a dog/s (ref)</b> | 68.2% (514)                                           | 23.9% (180)            | 8% (60)                | 52.5% (395)                                 | 27.1% (204)            | 20.5% (154)             | 34.5% (259)                                   | 28.7% (215)            | 36.8% (276)             |
| <b>Own a dog/s</b>             | 60.7% (207)                                           | 27% (92)               | 12.3% (42)             | 57.7% (195)                                 | 24.9% (84)             | 17.5% (59)              | 18.5% (63)                                    | 35.9% (122)            | 45.6% (155)             |

Don't know/ can't recall responses were all excluded from analysis.

STROBE Statement—Checklist of items that should be included in reports of *cross-sectional studies*

|                              | Item No | Recommendation                                                                                                                                                                                    | Page No                         |
|------------------------------|---------|---------------------------------------------------------------------------------------------------------------------------------------------------------------------------------------------------|---------------------------------|
| <b>Title and abstract</b>    | 1       | (a) Indicate the study's design with a commonly used term in the title or the abstract                                                                                                            | P1                              |
|                              |         | (b) Provide in the abstract an informative and balanced summary of what was done and what was found                                                                                               | P2                              |
| <b>Introduction</b>          |         |                                                                                                                                                                                                   |                                 |
| Background/rationale         | 2       | Explain the scientific background and rationale for the investigation being reported                                                                                                              | P3/4                            |
| Objectives                   | 3       | State specific objectives, including any prespecified hypotheses                                                                                                                                  | P3/4                            |
| <b>Methods</b>               |         |                                                                                                                                                                                                   |                                 |
| Study design                 | 4       | Present key elements of study design early in the paper                                                                                                                                           | P4/5                            |
| Setting                      | 5       | Describe the setting, locations, and relevant dates, including periods of recruitment, exposure, follow-up, and data collection                                                                   | P4/5                            |
| Participants                 | 6       | (a) Give the eligibility criteria, and the sources and methods of selection of participants                                                                                                       | P4/5                            |
| Variables                    | 7       | Clearly define all outcomes, exposures, predictors, potential confounders, and effect modifiers. Give diagnostic criteria, if applicable                                                          | P4-6                            |
| Data sources/<br>measurement | 8*      | For each variable of interest, give sources of data and details of methods of assessment (measurement). Describe comparability of assessment methods if there is more than one group              | P4-6                            |
| Bias                         | 9       | Describe any efforts to address potential sources of bias                                                                                                                                         | P4, 6                           |
| Study size                   | 10      | Explain how the study size was arrived at                                                                                                                                                         | P4                              |
| Quantitative variables       | 11      | Explain how quantitative variables were handled in the analyses. If applicable, describe which groupings were chosen and why                                                                      | P5-7                            |
| Statistical methods          | 12      | (a) Describe all statistical methods, including those used to control for confounding                                                                                                             | P6/7                            |
|                              |         | (b) Describe any methods used to examine subgroups and interactions                                                                                                                               | -                               |
|                              |         | (c) Explain how missing data were addressed                                                                                                                                                       | P4-7                            |
|                              |         | (d) If applicable, describe analytical methods taking account of sampling strategy                                                                                                                | P4-6                            |
|                              |         | (e) Describe any sensitivity analyses                                                                                                                                                             | -                               |
| <b>Results</b>               |         |                                                                                                                                                                                                   |                                 |
| Participants                 | 13*     | (a) Report numbers of individuals at each stage of study—eg numbers potentially eligible, examined for eligibility, confirmed eligible, included in the study, completing follow-up, and analysed | Supplementary Tables 1, 6 and 7 |
|                              |         | (b) Give reasons for non-participation at each stage                                                                                                                                              | -                               |
|                              |         | (c) Consider use of a flow diagram                                                                                                                                                                | -                               |

|                          |     |                                                                                                                                                                                                              |                                      |
|--------------------------|-----|--------------------------------------------------------------------------------------------------------------------------------------------------------------------------------------------------------------|--------------------------------------|
| Descriptive data         | 14* | (a) Give characteristics of study participants (eg demographic, clinical, social) and information on exposures and potential confounders                                                                     | P4/5, Supplementary Table 1          |
|                          |     | (b) Indicate number of participants with missing data for each variable of interest                                                                                                                          | Table 1 + Supplementary Table 1      |
| Outcome data             | 15* | Report numbers of outcome events or summary measures                                                                                                                                                         | Tables 2-4+ Supplementary Tables 2-7 |
| Main results             | 16  | (a) Give unadjusted estimates and, if applicable, confounder-adjusted estimates and their precision (eg, 95% confidence interval). Make clear which confounders were adjusted for and why they were included | P7-13                                |
|                          |     | (b) Report category boundaries when continuous variables were categorized                                                                                                                                    | -                                    |
|                          |     | (c) If relevant, consider translating estimates of relative risk into absolute risk for a meaningful time period                                                                                             | -                                    |
| Other analyses           | 17  | Report other analyses done—eg analyses of subgroups and interactions, and sensitivity analyses                                                                                                               | -                                    |
| <b>Discussion</b>        |     |                                                                                                                                                                                                              |                                      |
| Key results              | 18  | Summarise key results with reference to study objectives                                                                                                                                                     | P13/14                               |
| Limitations              | 19  | Discuss limitations of the study, taking into account sources of potential bias or imprecision. Discuss both direction and magnitude of any potential bias                                                   | P15/16                               |
| Interpretation           | 20  | Give a cautious overall interpretation of results considering objectives, limitations, multiplicity of analyses, results from similar studies, and other relevant evidence                                   | P13-15                               |
| Generalisability         | 21  | Discuss the generalisability (external validity) of the study results                                                                                                                                        | P13, 15/16                           |
| <b>Other information</b> |     |                                                                                                                                                                                                              |                                      |
| Funding                  | 22  | Give the source of funding and the role of the funders for the present study and, if applicable, for the original study on which the present article is based                                                | P17                                  |

\*Give information separately for exposed and unexposed groups.

**Note:** An Explanation and Elaboration article discusses each checklist item and gives methodological background and published examples of transparent reporting. The STROBE checklist is best used in conjunction with this article (freely available on the Web sites of PLoS Medicine at <http://www.plosmedicine.org/>, Annals of Internal Medicine at <http://www.annals.org/>, and Epidemiology at <http://www.epidem.com/>). Information on the STROBE Initiative is available at [www.strobe-statement.org](http://www.strobe-statement.org).
